# Supplementary material for: Merging Gold and Organocatalysis: A Facile Asymmetric Synthesis of Annulated Pyrroles
Source: PubMed Central journal article supplement — Chemistry. 2014 Mar 3;20(14):3917–21. doi: 10.1002/chem.201400407 (PMC4238261; doi:10.1002/chem.201400407), 2014-03-03

# CHEMISTRY

## A **European** Journal

### Supporting Information

© Copyright Wiley-VCH Verlag GmbH & Co. KGaA, 69451 Weinheim, 2014

#### **Merging Gold and Organocatalysis: A Facile Asymmetric Synthesis of Annulated Pyrroles**

Daniel Hack, Charles C. J. Loh, Jan M. Hartmann, Gerhard Raabe, and Dieter Enders\*<sup>[a]</sup>

chem\_201400407\_sm\_miscellaneous\_information.pdf

## **Table of Contents**

|                                                     |    |
|-----------------------------------------------------|----|
| General Information                                 | 2  |
| General Procedure A                                 | 2  |
| General Procedure B                                 | 3  |
| General Procedure C                                 | 4  |
| Characterization of Starting Materials and Products | 4  |
| HPLC Data                                           | 19 |
| NMR Data                                            | 48 |

## General Information

Unless otherwise noted, all commercially available compounds were used without further purification. Catalyst **10** was prepared according to the previously described procedure. For preparative column chromatography SIL G-25 UV252 from Macherey-Nagel, particle size 0.040-0.063 nm (230-240 mesh. flash) was used. Visualization of the developed TLC plates was performed with UV irradiation (254 nm) or by staining with ninhydrin. Optical rotations were measured on a Perkin-Elmer 241 polarimeter. Mass spectra were recorded on a Finnigan SSQ7000 (EI 70 eV) spectrometer and high-resolution mass spectra on a Thermo Fisher Scientific Orbitrap XL spectrometer. IR spectra were recorded on a Perkin-Elmer FT-IR Spectrum 100 using ATR-Unit.  $^1\text{H}$ ,  $^{13}\text{C}$  and  $^{19}\text{F}$  spectra were recorded at ambient temperature on Varian Mercury 300, Inova 400, Varian VNMRS-400, or Varian VNMRS-600 spectrometers with TMS as an internal standard. Analytical HPLC was performed on a Hewlett-Packard 1100 Series instrument using chiral stationary phases (Daicel AD, Daicel AS, Daicel IA, Daicel OD, Daicel OJ or Chiralpak IC).

## General Procedure A: Sonogashira-Ogihara-Crosscoupling

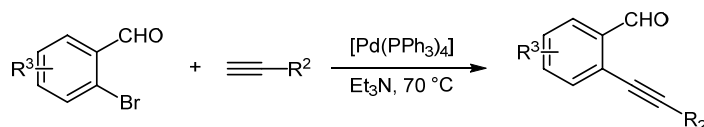

To a mixture of aryl bromide, copper(I) iodide (0.02 equiv.) and [Pd(PPh<sub>3</sub>)<sub>4</sub>] (0.01 equiv.) under argon was added degassed triethylamine (2 mL per mmol). The suspension was stirred for five minutes and the alkyne (1.10 equiv.) was added. The reaction mixture was heated to 70 °C. When the reaction was completed as determined by TLC, the dark suspension was allowed to cool to ambient temperature. Water (50 mL) was added and the resulting slurry was extracted three times with dichloromethane (50 mL). The combined organic phases were dried with magnesium sulfate and the solvent was removed *in vacuo*. Column chromatography of the crude product over silica gel using pentane/Et<sub>2</sub>O as eluant yielded the corresponding arylalkyne.

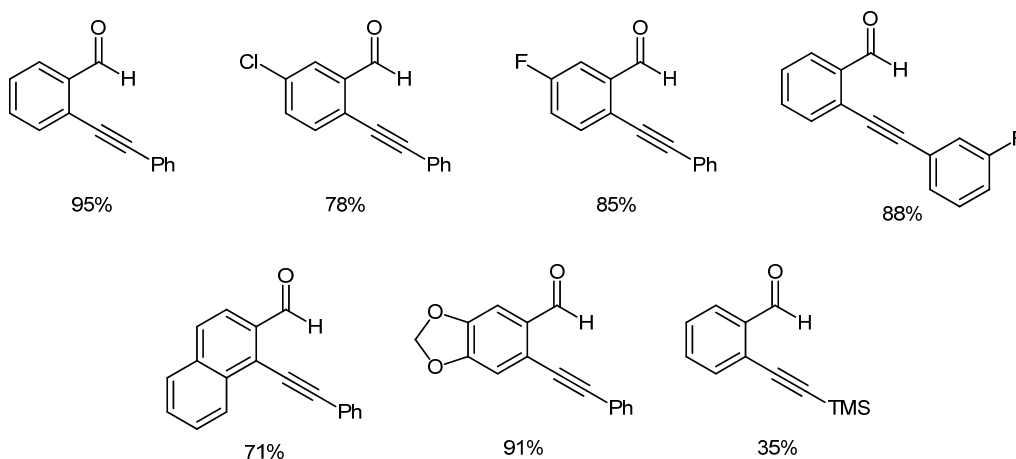

## General Procedure B: Wittig Olefination

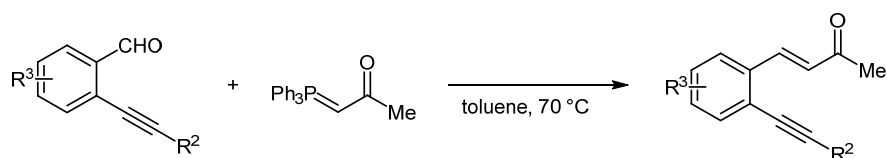

A suspension of the aldehyde and 1-(triphenylphosphoranylidene)propan-2-one (1.1 equiv.) in toluene (0.5 M) was heated with stirring to 70 °C, dissolving any residual solid reactant. When the reaction was completed as determined by TLC, the solution was left to cool to ambient temperature, and the toluene was removed *in vacuo*. Pentane/Et<sub>2</sub>O was added and the resulting suspension was filtered. The yellowish filtrate was collected and the solvent removed *in vacuo*. Column chromatography of the crude product over silica gel using pentane/Et<sub>2</sub>O as solvent afforded the corresponding enone.

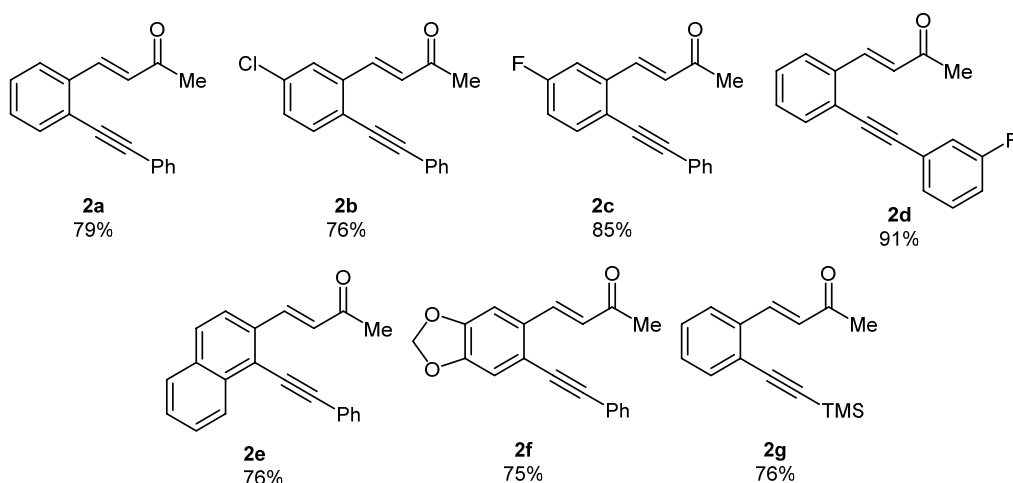

## General Procedure C: Sequential catalysis

Freshly distilled pyrrole (69  $\mu\text{L}$ , 1.00 mmol) or 2-arylpyrrole (0.55 mmol) was added to a solution of 9-amino(9-deoxy)*epi* cinchonine **10** (29 mg, 0.20 mmol), TFA (16  $\mu\text{L}$ , 0.15 mmol) and enone (0.50 mmol) in toluene (3 mL) at 0  $^{\circ}\text{C}$ . The reaction was stirred at 0  $^{\circ}\text{C}$  and the progress of the reaction was monitored by TLC analysis. After complete consumption of the starting material, a suspension of AgNTf<sub>2</sub> (10 mg, 0.10 mmol) and catalyst **13** (13 mg, 0.10 mmol) in toluene (1 mL) was added to the reaction mixture at room temperature. After complete conversion, the crude product was directly subjected to flash chromatography (silica gel, pentane/Et<sub>2</sub>O).

### (*E*)-4-(2-(Phenylethynyl)phenyl)but-3-en-2-one (**2a**)

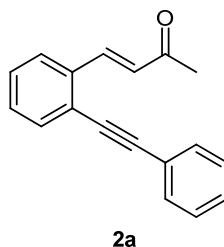

Compound **2a** was isolated after flash chromatography (SiO<sub>2</sub>, Pentane/Et<sub>2</sub>O 10:1) as yellow crystals (1.891 g, 79%). **Molecular formula:** C<sub>18</sub>H<sub>14</sub>O. **Molecular mass** 246.303 g mol<sup>-1</sup>. **R<sub>f</sub>**(Pentane/Et<sub>2</sub>O 15:1) = 0.14. **Mp:** 62-65  $^{\circ}\text{C}$ . **<sup>1</sup>H NMR** (400 MHz, CDCl<sub>3</sub>):  $\delta$  = 2.44 (s, 3 H, Me), 6.75 (d,  $J$  = 16.4 Hz, 1 H, CH), 7.33-7.44 (m, 5 H, Ar), 7.54-7.71 (m, 3 H, ArH), 7.65-7.71 (m, 1 H, ArH), 8.15 (d,  $J$  = 16.5 Hz, 1 H, CH). **<sup>13</sup>C NMR** (150 MHz, CDCl<sub>3</sub>):  $\delta$  = 27.2 (q), 87.0 (s), 95.9 (s), 122.9 (s), 124.4 (s), 126.3 (d), 128.7 (d, 2 C), 128.8 (d), 128.9 (d, 2 C), 130.1 (d), 131.7 (d, 2 C), 133.0 (d), 135.9 (s), 141.7 (d), 198.7 (s). **IR** (ATR):  $\tilde{\nu}$  = 3921, 3294, 3031, 2920, 2655, 2331, 2215, 2064, 1935, 1820, 1736, 1659, 1490, 1438, 1359, 1256, 1199, 1070, 1012, 968, 914, 840, 755, 689 cm<sup>-1</sup>. **MS (EI<sup>+</sup>)**  $m/z$  (%): 246.2 (73) [M]<sup>+</sup> = [C<sub>18</sub>H<sub>14</sub>O]<sup>+</sup>, 231.2 (67) [M-CH<sub>3</sub>]<sup>+</sup> = [C<sub>17</sub>H<sub>11</sub>O]<sup>+</sup>, 203.1 (67) [M-C<sub>2</sub>H<sub>3</sub>O]<sup>+</sup> = [C<sub>16</sub>H<sub>11</sub>]<sup>+</sup>, 202.1 (100) [M-C<sub>2</sub>H<sub>4</sub>O]<sup>+</sup> = [C<sub>16</sub>H<sub>10</sub>]<sup>+</sup>. **MS (CI<sup>+</sup>, methane)**  $m/z$  (%): 247.1 (100) [M+H]<sup>+</sup> = [C<sub>18</sub>H<sub>15</sub>O]<sup>+</sup>, 246.1 (16) [M]<sup>+</sup> = [C<sub>18</sub>H<sub>14</sub>O]<sup>+</sup>, 105.1 (73). **EA** calcd. for C<sub>18</sub>H<sub>14</sub>O: C 87.78%, H 5.73%; found: C 87.91%, H 6.00%.

### (*E*)-4-(5-Chloro-2-(phenylethynyl)phenyl)but-3-en-2-one (**2b**)

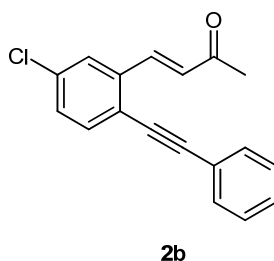

Compound **2b** was isolated after flash chromatography (SiO<sub>2</sub>, Pentane/Et<sub>2</sub>O 5:1) as yellow solid (0.354 g, 76%). **Molecular formula:** C<sub>18</sub>H<sub>13</sub>ClO. **Molecular mass** 280.748 g mol<sup>-1</sup>. **R<sub>f</sub>**(Pentane/Et<sub>2</sub>O 10:1) = 0.27. **Mp:** 64-66 °C **<sup>1</sup>H NMR** (400 MHz, CDCl<sub>3</sub>): δ = 2.41 (s, 3 H, Me), 6.75 (d, *J* = 16.4 Hz, 1 H, CH), 7.30-7.38 (m, 4 H, ArH), 7.48-7.62 (m, 4 H, ArH), 8.03 (d, *J* = 16.4 Hz, 1 H, CH). **<sup>13</sup>C NMR** (100 MHz, CDCl<sub>3</sub>): δ = 27.6 (q), 86.1 (s), 96.7 (s), 122.6 (s), 122.8 (s), 126.3 (d), 128.7 (d, 2 C), 129.1 (d), 129.5 (d), 130.3 (d), 131.7 (d, 2 C), 134.0 (d), 134.8 (d), 137.4 (s), 140.0 (d), 198.1 (s). **IR** (ATR):  $\tilde{\nu}$  = 3062, 2921, 2648, 2327, 2215, 2093, 1898, 1818, 1660, 1540, 1491, 1467, 1434, 1359, 1260, 1187, 1105, 1012, 973, 909, 818, 755, 719, 688 cm<sup>-1</sup>. **MS (EI<sup>+</sup>)** *m/z* (%): 282.2 (10) [M, <sup>37</sup>Cl]<sup>+</sup> = [C<sub>18</sub>H<sub>13</sub>ClO]<sup>+</sup>, 280.3 (29) [M, <sup>35</sup>Cl]<sup>+</sup> = [C<sub>18</sub>H<sub>13</sub>ClO]<sup>+</sup>, 265.2 (28) [M-CH<sub>3</sub>]<sup>+</sup> = [C<sub>17</sub>H<sub>10</sub>ClO]<sup>+</sup>, 245.3 (51) [M-Cl]<sup>+</sup> = [C<sub>18</sub>H<sub>13</sub>O]<sup>+</sup>, 203.2 (24), 202.2 (100) [M-Cl-C<sub>2</sub>H<sub>3</sub>O]<sup>+</sup> = [C<sub>16</sub>H<sub>10</sub>]<sup>+</sup>, 201.2 (22), 200.2 (29.0), 101.1 (17.2) [C<sub>8</sub>H<sub>5</sub>]<sup>+</sup>, 100.2 (12). **EA** calcd. for C<sub>18</sub>H<sub>13</sub>ClO: C 77.01%, H 4.67%; found: C 77.09%, H 4.67%.

**(E)-4-(5-Fluoro-2-(phenylethynyl)phenyl)but-3-en-2-one (2c)**

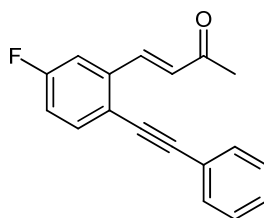

**2c**

Compound **2c** was isolated after flash chromatography (SiO<sub>2</sub>, Pentane/Et<sub>2</sub>O 5:1) as pale yellow crystals (0.998 g, 85%). **Molecular formula:** C<sub>18</sub>H<sub>13</sub>FO. **Molecular mass:** 264.294 g mol<sup>-1</sup>. **R<sub>f</sub>** (pentane/Et<sub>2</sub>O 5:1): 0.56. **Mp:** 60-63 °C. **<sup>1</sup>H NMR** (400 MHz, CDCl<sub>3</sub>): δ = 2.42 (s, 3 H, Me), 6.73 (d, *J* = 16.4 Hz, 1 H, CH), 7.08 (td, *J* = 2.6 Hz, *J* = 8.3 Hz, 1 H, ArH), 7.32-7.39 (m, 4 H, ArH), 7.53-7.58 (m, 3 H, ArH), 8.07 (dd, *J* = 1.5 Hz, *J* = 16.4 Hz, 1 H, CH). **<sup>13</sup>C{<sup>19</sup>F} NMR** (100MHz, CDCl<sub>3</sub>): δ = 27.6 (q), 86.1 (s), 95.6 (s), 113.0 (d), 117.8 (d, 2 C), 120.7 (s), 128.8 (d, 2 C), 129.1 (d), 129.7 (d), 131.7 (d, 2 C), 134.9 (d), 138.3 (s), 140.5 (d), 162.7 (d), 198.4 (s). **<sup>19</sup>F{<sup>1</sup>H} NMR** (376 MHz, CDCl<sub>3</sub>): δ = -110.0. **IR** (ATR):  $\tilde{\nu}$  = 3826, 3292, 3033, 2660, 2335, 2211, 2092, 1903, 1808, 1734, 1657, 1567, 1490, 1422, 1358, 1316, 1257, 1200, 1154, 1073, 1014, 910, 833, 754, 686 cm<sup>-1</sup>. **MS (EI<sup>+</sup>)** *m/z* (%): 265.2 (28), 264.1 (91) [M]<sup>+</sup> = [C<sub>18</sub>H<sub>13</sub>FO]<sup>+</sup>, 250.1 (18), 249.1 (89) [M-CH<sub>3</sub>]<sup>+</sup> = [C<sub>17</sub>H<sub>10</sub>FO]<sup>+</sup>, 222.2 (17), 221.2 (77) [M-C<sub>2</sub>H<sub>3</sub>O]<sup>+</sup> = [C<sub>16</sub>H<sub>10</sub>F]<sup>+</sup>, 220.1 (100) [M-C<sub>2</sub>H<sub>4</sub>O]<sup>+</sup> = [C<sub>16</sub>H<sub>9</sub>F]<sup>+</sup>, 219.1 (15), 218.1 (20), 200.1 (12) [M-C<sub>2</sub>H<sub>4</sub>FO]<sup>+</sup> = [C<sub>16</sub>H<sub>9</sub>]<sup>+</sup>, 110.1 (20), 105.1 (20). **MS (CI<sup>+</sup>, methane)** *m/z* (%): 266.2 (22), 265.2 (100) [M+H]<sup>+</sup> = [C<sub>18</sub>H<sub>14</sub>FO]<sup>+</sup>, 264.2 (14) [M]<sup>+</sup> = [C<sub>18</sub>H<sub>13</sub>FO]<sup>+</sup>, 105.1 (56). **EA:** calcd. for C<sub>18</sub>H<sub>13</sub>FO: C 81.80 %, H 4.96 %; found: C 81.98 %, H 4.93 %.

**(E)-4-(2-((3-Fluorophenyl)ethynyl)phenyl)but-3-en-2-one (2d)**

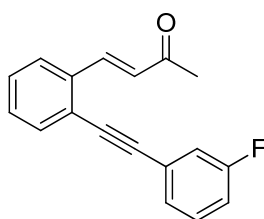

**2d**

Compound **2d** was isolated after flash chromatography (SiO<sub>2</sub>, Pentane/Et<sub>2</sub>O 5:1) as pale yellow crystals (0.325 g, 91%). **Molecular formula:** C<sub>18</sub>H<sub>13</sub>FO. **Molecular mass:** 264.294 g mol<sup>-1</sup>. **R<sub>f</sub>** (pentane/Et<sub>2</sub>O 10:1): 0.19. **Mp:** 60-62 °C. **<sup>1</sup>H NMR** (400MHz, CDCl<sub>3</sub>): δ = 2.41 (s, 3 H, Me), 6.76 (d, *J* = 16.4 Hz, 1 H, CH), 7.04-7.09 (m, 1 H, ArH), 7.22-7.24 (m, 1 H, ArH), 7.31-7.38 (m, 4 H, ArH), 7.57 (dd, *J* = 3.5 Hz, *J* = 5.6 Hz, 1 H, ArH), 7.65 (dd, *J* = 3.6 Hz, *J* = 5.6 Hz, 1 H, ArH), 8.08 (d, *J* = 16.4 Hz, 1 H, CH). **<sup>13</sup>C{<sup>19</sup>F} NMR** (100 MHz, CDCl<sub>3</sub>): δ = 27.3 (q), 87.8 (s), 94.3 (d), 116.2 (d), 118.3 (d), 123.8 (s), 124.7 (s), 126.3 (d), 127.5 (d), 128.9 (d), 129.1 (d), 130.1 (d), 130.2 (d), 133.1 (d), 136.0 (s), 141.2 (d), 162.5 (d), 198.5 (s). **<sup>19</sup>F{<sup>1</sup>H} NMR** (376MHz, CDCl<sub>3</sub>): δ = -112.5. **IR** (ATR): ν̄ = 3826, 3293, 3061, 2922, 2854, 2663, 2336, 2200, 2086, 1994, 1938, 1794, 1732, 1657, 1575, 1481, 1426, 1359, 1318, 1256, 1205, 1164, 1120, 1069, 1012, 966, 942, 864, 789, 753, 678 cm<sup>-1</sup>. **MS (EI<sup>+</sup>)** *m/z* (%): 265.1 (15), 264.1 (74) [M]<sup>+</sup> = [C<sub>18</sub>H<sub>13</sub>FO]<sup>+</sup>, 250.1 (14), 249.1 (76) [M-CH<sub>3</sub>]<sup>+</sup> = [C<sub>17</sub>H<sub>10</sub>FO]<sup>+</sup>, 222.1 (15), 221.1 (74) [M-C<sub>3</sub>H<sub>5</sub>O]<sup>+</sup> = [C<sub>15</sub>H<sub>8</sub>F]<sup>+</sup>, 220.1 (100) [M-C<sub>3</sub>H<sub>6</sub>O]<sup>+</sup> = [C<sub>15</sub>H<sub>7</sub>F]<sup>+</sup>, 219.1 (14), 200.1 (11) [M-C<sub>3</sub>H<sub>6</sub>FO]<sup>+</sup> = [C<sub>15</sub>H<sub>7</sub>]<sup>+</sup>, 123.0 (11), 110.2 (24). **MS (CI<sup>+</sup>, methane)** *m/z* (%): 266.2 (27), 265.2 (100) [M+H]<sup>+</sup> = [C<sub>18</sub>H<sub>14</sub>FO]<sup>+</sup>, 264.2 (22) [M]<sup>+</sup> = [C<sub>18</sub>H<sub>13</sub>FO]<sup>+</sup>, 123.1 (56). **EA:** calcd. for C<sub>18</sub>H<sub>13</sub>FO: C 81.80 %, H 4.96 %; found: C 81.80 %, H 5.35 %.

**(E)-4-(1-(Phenylethynyl)naphthalen-2-yl)but-3-en-2-one (2e)**

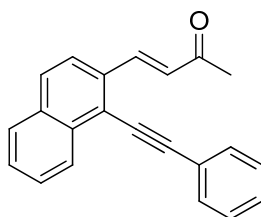

**2e**

Compound **2e** was isolated after flash chromatography (SiO<sub>2</sub>, Pentane/Et<sub>2</sub>O 5:1) as yellow powder (1.312 g, 76%). **Molecular formula:** C<sub>22</sub>H<sub>16</sub>O. **Molecular mass:** 296.362 g mol<sup>-1</sup>. **R<sub>f</sub>** (pentane/Et<sub>2</sub>O 5:1): 0.31. **Mp:** 114-116 °C. **<sup>1</sup>H NMR** (600 MHz, CDCl<sub>3</sub>): δ = 2.47 (s, 3 H, Me), 6.82 (d, *J* = 16.4 Hz, 1 H, CH), 7.39-7.47 (m, 3 H, ArH), 7.55 (t, *J* = 7.3 Hz, 1 H, ArH), 7.61 (t, *J* = 7.2 Hz, 1 H, ArH), 7.66-7.73 (m, 3 H, ArH), 7.78 (d, *J* = 8.7 Hz, 1 H, ArH), 7.82 (d, *J* = 8.0 Hz, 1 H, ArH), 8.41 (d, *J* = 16.4 Hz, 1 H, CH), 8.48 (d, *J* = 8.4 Hz, 1 H, ArH). **<sup>13</sup>C NMR** (150 MHz, CDCl<sub>3</sub>): δ = 27.2 (q), 85.1 (s), 101.9 (s), 122.4 (d), 123.0 (s, 2 C), 127.3 (d), 127.7 (d), 127.8 (d), 128.4 (d), 128.8 (d, 2

C), 128.9 (d), 129.0 (d), 129.1 (d), 131.7 (d, 2 C), 133.5 (s), 133.9 (s), 134.2 (s), 142.1 (d), 198.7 (s). **IR** (ATR):  $\tilde{\nu}$  = 3825, 3287, 3051, 2924, 2668, 2322, 2200, 2105, 1923, 1814, 1657, 1610, 1490, 1436, 1349, 1258, 1067, 1009, 962, 908, 864, 807, 746, 681  $\text{cm}^{-1}$ . **MS** ( $\text{EI}^+$ )  $m/z$  (%): 295.9 (13)  $[\text{M}]^+ = [\text{C}_{22}\text{H}_{16}\text{O}]^+$ , 295.1 (21)  $[\text{M}-\text{H}]^+ = [\text{C}_{22}\text{H}_{15}\text{O}]^+$ , 281.6 (23)  $[\text{M}-\text{CH}_3]^+ = [\text{C}_{21}\text{H}_{13}\text{O}]^+$ , 280.6 (16), 279.6 (16), 253.9 (18), 252.8 (77)  $[\text{M}-\text{C}_2\text{H}_3\text{O}]^+ = [\text{C}_{20}\text{H}_{13}]^+$ , 251.8 (62)  $[\text{M}-\text{C}_2\text{H}_4\text{O}]^+ = [\text{C}_{20}\text{H}_{12}]^+$ , 251.0 (14), 250.3 (100), 248.6 (40), 226.4 (15)  $[\text{M}-\text{C}_4\text{H}_5\text{O}]^+ = [\text{C}_{18}\text{H}_{11}]^+$ . **EA**: calcd. for  $\text{C}_{22}\text{H}_{16}\text{O}$ : C 89.16 %, H 5.44 %; found: C 88.90 %, H 5.29 %.

**(E)-4-(6-(Phenylethynyl)benzo[d][1,3]dioxol-5-yl)but-3-en-2-one (2f)**

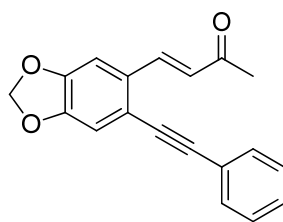

**2f**

Compound **2f** was isolated after flash chromatography ( $\text{SiO}_2$ , Pentane/ $\text{Et}_2\text{O}$  3:1) as yellow powder (1.313 g, 75%). **Molecular formula**:  $\text{C}_{19}\text{H}_{14}\text{O}_3$ . **Molecular mass**: 290.313  $\text{g mol}^{-1}$ . **R<sub>f</sub>** (pentane/ $\text{Et}_2\text{O}$  3:1): 0.21. **Mp**: 135-136 °C. **<sup>1</sup>H NMR** (600 MHz,  $\text{CDCl}_3$ ):  $\delta$  = 2.42 (s, 3 H, Me), 6.04 (s, 2 H,  $\text{CH}_2$ ), 6.59 (d,  $J$  = 16.3 Hz, 1 H, CH), 7.00 (s, 1 H, ArH), 7.11 (s, 1 H, ArH), 7.36-7.39 (m, 3 H, ArH), 7.53-7.55 (m, 2 H, ArH), 8.13 (d,  $J$  = 16.3 Hz, 1 H, CH). **<sup>13</sup>C NMR** (150 MHz,  $\text{CDCl}_3$ ):  $\delta$  = 27.1 (q), 87.0 (s), 94.9 (s), 102.2 (t), 105.3 (d), 111.9 (d), 119.5 (s), 122.9 (s), 127.1 (d), 128.7 (d, 2 C), 128.8 (d, 2 C), 131.1 (s), 131.6 (d), 141.6 (d), 148.8 (s), 149.6 (s), 198.7 (s). **IR** (ATR):  $\tilde{\nu}$  = 3808, 3262, 3054, 3001, 2915, 2773, 2661, 2321, 2189, 2106, 1982, 1923, 1844, 1708, 1635, 1603, 1478, 1432, 1365, 1318, 1295, 1246, 1221, 1140, 1026, 971, 922, 857, 787, 750, 685  $\text{cm}^{-1}$ . **MS** ( $\text{ESI}^+$ )  $m/z$  (%): 276.1 (48)  $[\text{M}-\text{CH}_3]^+ = [\text{C}_{18}\text{H}_{11}\text{O}_3]^+$ , 273.1 (43), 272.1 (71), 263.1 (14), 261.1 (22), 249.1 (19), 248.1 (15)  $[\text{M}-\text{C}_2\text{H}_3\text{O}]^+ = [\text{C}_{17}\text{H}_{11}\text{O}_2]^+$ , 246.1 (100), 244.1 (12), 233.1 (23), 105.0 (37). **HR-MS** ( $\text{ESI}^+$ )  $m/z$  (%): calcd. for  $[\text{M}+\text{H}]^+ = [\text{C}_{19}\text{H}_{15}\text{O}_3]^+$ : 291.1016; found: 291.1008. **EA**: calcd. for  $\text{C}_{19}\text{H}_{14}\text{O}_3$ : C 78.61 %, H 4.86 %; found: C 78.34 %, H 4.91 %.

**(E)-4-(2-((Trimethylsilyl)ethynyl)phenyl)but-3-en-2-one (2g)**

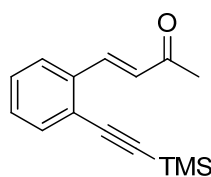

**2g**

Compound **2g** was isolated after flash chromatography ( $\text{SiO}_2$ , Pentane/ $\text{Et}_2\text{O}$  3:1) as colorless powder (1,650 g, 76%). **Molecular formula**:  $\text{C}_{15}\text{H}_{18}\text{OSi}$ . **Molecular mass**: 242.388  $\text{g mol}^{-1}$ . **R<sub>f</sub>**



(pentane/Et<sub>2</sub>O 5:1): 0.63. **Mp**: 65–67 °C. **<sup>1</sup>H NMR** (600 MHz, CDCl<sub>3</sub>): δ = 0.29 (s, 9 H, Me), 2.41 (s, 3 H, Me), 6.72 (d, *J* = 16.5 Hz, 1 H, CH), 7.31-7.36 (m, 2 H, ArH), 7.50-7.52 (m, 1 H, ArH), 7.62-7.65 (m, 1 H, ArH), 8.06 (d, *J* = 16.6 Hz, 1 H, CH). **<sup>13</sup>C NMR** (150 MHz, CDCl<sub>3</sub>): δ = 0.1 (q, 3 C), 26.7 (q), 101.4 (s), 102.5 (s), 124.2 (s), 126.1 (d), 129.0 (d, 2 C), 130.0 (d), 133.2 (d), 136.3 (s), 141.8 (d), 198.9 (s). **IR** (ATR):  $\tilde{\nu}$  = 3290, 3060, 2960, 2323, 2153, 1984, 1938, 1658, 1468, 1414, 1354, 1291, 1245, 1091, 971, 834, 756 cm<sup>-1</sup>. **MS (EI<sup>+</sup>)** *m/z* (%): 242.9 (15), 242.1 (15) [M]<sup>+</sup> = [C<sub>15</sub>H<sub>18</sub>OSi]<sup>+</sup>, 227.8 (57), 226.9 (50) [M-CH<sub>3</sub>]<sup>+</sup> = [C<sub>14</sub>H<sub>15</sub>OSi]<sup>+</sup>, 199.0 (22) [M-C<sub>2</sub>H<sub>5</sub>O]<sup>+</sup> = [C<sub>13</sub>H<sub>13</sub>Si]<sup>+</sup>, 197.7 (73), 168.9 (21) [M-TMS]<sup>+</sup> = [C<sub>12</sub>H<sub>9</sub>O]<sup>+</sup>, 167.9 (41). **MS (CI<sup>+</sup>, methane)** *m/z* (%): 242.8 (29) [M+H]<sup>+</sup> = [C<sub>15</sub>H<sub>19</sub>OSi]<sup>+</sup>, 226.4 (64) [M-CH<sub>3</sub>]<sup>+</sup> = [C<sub>14</sub>H<sub>15</sub>OSi]<sup>+</sup>, 199.5 (29) [M-C<sub>2</sub>H<sub>5</sub>O]<sup>+</sup> = [C<sub>13</sub>H<sub>13</sub>Si]<sup>+</sup>. **EA**: calcd. for C<sub>15</sub>H<sub>18</sub>OSi: C 74.33 %, H 7.49 %; found: C 74.23 %, H 7.26 %.

### Characterization of the Michael product 3

#### (*R*)-4-(2-(Phenylethynyl)phenyl)-4-(1H-pyrrol-2-yl)butan-2-one (3)

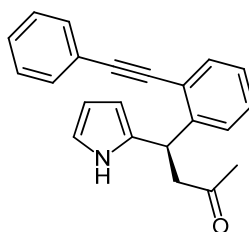

3

Compound **3** was isolated after flash chromatography (SiO<sub>2</sub>, Pentane/Et<sub>2</sub>O 5:1) as colorless oil (149.1 mg, 95%). **Molecular formula**: C<sub>22</sub>H<sub>19</sub>NO. **Molecular mass**: 313.392 g mol<sup>-1</sup>. **R<sub>f</sub>**(Pentane/EtOAc 4:1) = 0.30. **HPLC**: AS, 9/1 *n*-Heptane/EtOH, 1.0 ml/min, λ = 230 nm, τ<sub>minor</sub> = 6.2 min, τ<sub>major</sub> = 7.0 min. **[α]<sub>D</sub><sup>20</sup>** = -210.6 (*c* = 0.75, CHCl<sub>3</sub>, 93% ee). **<sup>1</sup>H NMR** (600 MHz, CDCl<sub>3</sub>): δ = 2.13 (s, 3 H, Me), 3.07 (dd, *J* = 4.9 Hz, *J* = 17.0 Hz, 1 H, CH<sub>2</sub>), 3.26 (dd, *J* = 9.4 Hz, *J* = 17.0 Hz, 1 H, CH<sub>2</sub>), 5.23 (dd, *J* = 4.9 Hz, *J* = 9.4 Hz, 1 H, CH), 5.90-5.93 (m, 1 H, ArH), 6.10 (dd, *J* = 2.8 Hz, *J* = 6.0 Hz, 1 H, ArH), 6.61-6.64 (m, 1 H, ArH), 7.13 (dd, *J* = 1.1 Hz, *J* = 7.7 Hz, 1 H, ArH), 7.19 (dt, *J* = 1.4 Hz, *J* = 7.5 Hz, 1 H, ArH), 7.24 (dt, *J* = 1.4 Hz, *J* = 7.6 Hz, 1 H, ArH), 7.30-7.36 (m, 3 H, ArH), 7.50-7.55 (m, 3 H, ArH), 8.30 (s, 1 H, NH). **<sup>13</sup>C NMR** (150 MHz, CDCl<sub>3</sub>): δ = 30.3 (q), 37.4 (d), 49.1 (t), 87.7 (s), 94.4 (s), 105.4 (d), 108.0 (d), 117.3 (d), 122.2 (s), 123.1 (s), 126.7 (d), 127.5 (d), 128.5 (d, 2 C), 128.6 (d, C), 128.9 (d), 131.7 (d, 2 C), 132.6 (d), 133.4 (s), 144.9 (s), 207.4 (s). **IR** (ATR):  $\tilde{\nu}$  = 3730, 3340, 3134, 3095, 2997, 2905, 2848, 2650, 2452, 2331, 2113, 2016, 1825, 1696, 1597, 1568, 1492, 1440, 1356, 1287, 1240, 1186, 1154, 1118, 1096, 1022, 951, 914, 878, 799, 753, 722, 688 cm<sup>-1</sup>. **MS (EI<sup>+</sup>)** *m/z* (%): 313.3 (11) [M]<sup>+</sup> = [C<sub>22</sub>H<sub>19</sub>NO]<sup>+</sup>, 270.1 (42) [M-C<sub>2</sub>H<sub>3</sub>O]<sup>+</sup> = [C<sub>20</sub>H<sub>16</sub>NO]<sup>+</sup>, 256.3 (60) [M-C<sub>3</sub>H<sub>5</sub>O]<sup>+</sup> = [C<sub>19</sub>H<sub>14</sub>N]<sup>+</sup>, 255.1 (100), 254.1 (84), 203.0 (25). **MS (CI<sup>+</sup>, methane)** *m/z* (%): 314.3 (54) [M+H]<sup>+</sup> = [C<sub>22</sub>H<sub>20</sub>NO]<sup>+</sup>, 313.3 (12) [M]<sup>+</sup> = [C<sub>22</sub>H<sub>19</sub>NO]<sup>+</sup>, 257.2 (100), 256.3 (100) [M-C<sub>3</sub>H<sub>5</sub>O]<sup>+</sup> =

[C<sub>19</sub>H<sub>14</sub>N]<sup>+</sup>. **HR-MS (ESI<sup>+</sup>)** *m/z* (%): calcd. for [M+Na]<sup>+</sup> = [C<sub>22</sub>H<sub>19</sub>NaNO<sub>3</sub>]<sup>+</sup>: 336.13589; found: 336.13568.

**(R)-1-(4-Phenyl-1,10-dihydrobenzo[5,6]cyclohepta[1,2-*b*]pyrrol-10-yl)propan-2-one (17a)**

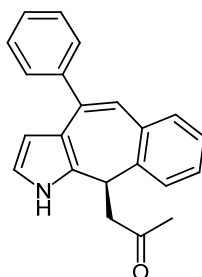

**17a**

Compound **17a** was isolated after flash chromatography (SiO<sub>2</sub>, Pentane/Et<sub>2</sub>O 2:1) as pale yellow foam (139.0 mg, 89%). **Molecular formula:** C<sub>22</sub>H<sub>19</sub>NO. **Molecular mass:** 313.392 g mol<sup>-1</sup>. **R<sub>f</sub>**(Pentane/Et<sub>2</sub>O 2:1) = 0.19. **Mp:** 150-152 °C. **HPLC:** OD, 95/5 *n*-Heptane/*i*PrOH, 1.0 ml/min, λ = 230 nm, τ<sub>minor</sub> = 5.9 min, τ<sub>major</sub> = 7.6 min. **[α]<sub>D</sub><sup>20</sup>** = -9.9 (*c* = 0.5, CHCl<sub>3</sub>, 94% ee). **<sup>1</sup>H NMR** (600 MHz, CD<sub>2</sub>Cl<sub>2</sub>): δ = 1.90 (s, 3 H, Me), 2.52-2.62 (m, 1 H, CH<sub>2</sub>), 3.07 (dd, *J* = 9.5 Hz, *J* = 17.4 Hz, 1 H, CH<sub>2</sub>), 4.59 (dd, *J* = 4.9 Hz, *J* = 9.3 Hz, 1 H, CH), 5.93 (t, *J* = 2.7 Hz, 1 H, ArH), 6.63 (d, *J* = 2.7 Hz, 1 H, ArH), 6.90 (s, 1 H, CH), 7.21-7.31 (m, 3 H, ArH), 7.33-7.38 (m, 1 H, ArH), 7.39-7.46 (m, 3 H, ArH), 7.58-7.63 (m, 2 H, ArH), 8.50 (s, 1 H, NH). **<sup>13</sup>C NMR** (150 MHz, CD<sub>2</sub>Cl<sub>2</sub>): δ = 31.0 (q), 41.7 (d), 45.4 (t), 109.9 (d), 116.7 (d), 117.3 (s), 124.9 (d), 126.7 (d), 128.0 (d), 128.5 (d), 128.6 (d, 2 C), 129.2 (d, 3 C), 131.3 (d), 132.2 (s), 136.1 (s), 138.5 (s, 2 C), 143.6 (s), 208.2 (s). **IR** (ATR):  $\tilde{\nu}$  = 3852, 3748, 3649, 3407, 3055, 2923, 2879, 2671, 2480, 2325, 2210, 2170, 2114, 2033, 1986, 1955, 1892, 1813, 1704, 1598, 1563, 1487, 1396, 1360, 1295, 1264, 1215, 1163, 1121, 1081, 1031, 950, 892, 843, 765, 697, 660 cm<sup>-1</sup>. **MS (EI<sup>+</sup>)** *m/z* (%): 313.3 (13) [M]<sup>+</sup> = [C<sub>22</sub>H<sub>19</sub>NO]<sup>+</sup>, 256.3 (100) [M-C<sub>3</sub>H<sub>5</sub>O]<sup>+</sup> = [C<sub>19</sub>H<sub>14</sub>N]<sup>+</sup>. **MS (CI<sup>+</sup>, methane)** *m/z* (%): 314.3 (38) [M+H]<sup>+</sup> = [C<sub>22</sub>H<sub>20</sub>NO]<sup>+</sup>, 313.3 (25) [M]<sup>+</sup> = [C<sub>22</sub>H<sub>19</sub>NO]<sup>+</sup>, 256.3 (100) [M-C<sub>3</sub>H<sub>5</sub>O]<sup>+</sup> = [C<sub>19</sub>H<sub>14</sub>N]<sup>+</sup>. **HR-MS (ESI<sup>+</sup>)** *m/z* (%): calcd. for [M+Na]<sup>+</sup> = [C<sub>22</sub>H<sub>19</sub>NNaO]<sup>+</sup>: 336.1359; found: 336.1359.

**(R)-1-(8-Chloro-4-phenyl-1,10-dihydrobenzo[5,6]cyclohepta[1,2-*b*]pyrrol-10-yl)propan-2-one (17b)**

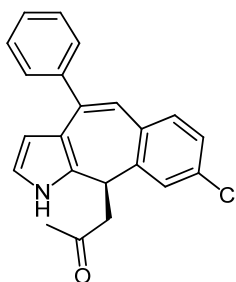

**17b**

Compound **17b** was isolated after flash chromatography (SiO<sub>2</sub>, Pentane/Et<sub>2</sub>O 2:1) as pale yellow foam (173.0 mg, 99%). **Molecular formula:** C<sub>22</sub>H<sub>18</sub>ClNO. **Molecular mass:** 347.837 g mol<sup>-1</sup>. **R<sub>f</sub>**(Pentane/Et<sub>2</sub>O 2:1) = 0.29. **Mp:** 58-60 °C. **HPLC:** IA, 9/1 *n*-Heptane/EtOH, 0.7 ml/min, λ = 230 nm, τ<sub>minor</sub> = 10.5 min, τ<sub>major</sub> = 8.3 min.  $[\alpha]_D^{20} = +14.6$  (*c* = 0.5, CHCl<sub>3</sub>, 91% ee). **<sup>1</sup>H NMR** (600 MHz, CDCl<sub>3</sub>): δ = 1.98 (s, 3 H, Me), 2.58 (dd, *J* = 3.7 Hz, *J* = 17.4 Hz, 1 H, CH<sub>2</sub>), 3.15 (dd, *J* = 9.7 Hz, *J* = 17.4 Hz, 1 H, CH<sub>2</sub>), 4.61 (dd, *J* = 4.6 Hz, *J* = 9.7 Hz, 1 H, CH), 6.02 (t, *J* = 2.7 Hz, 1 H, ArH), 6.64 (d, *J* = 2.7 Hz, 1 H, ArH), 6.68 (s, 1 H, CH), 7.17-7.32 (m, 2 H, ArH), 7.35-7.43 (m, 2 H, ArH), 7.46 (t, *J* = 7.4, 2 H, ArH), 7.60-7.69 (m, 2 H, ArH), 8.64 (s, 1 H, NH). **<sup>13</sup>C NMR** (150 MHz, CDCl<sub>3</sub>): 30.9 (q), 40.9 (d), 44.9 (t), 109.8 (d), 116.7 (d), 117.0 (s), 123.3 (d), 126.4 (d), 127.8 (d), 128.3 (d, 2 C), 128.5 (d), 128.7 (d, 2 C), 131.0 (s), 132.2 (d), 133.6 (s), 134.3 (s), 138.5 (s), 139.0 (s), 142.9 (s), 208.0 (s). **IR** (ATR):  $\tilde{\nu}$  = 3854, 3629, 3370, 3057, 3024, 2979, 2891, 2670, 2486, 2324, 2175, 2035, 1992, 1952, 1893, 1703, 1590, 1547, 1486, 1357, 1291, 1244, 1158, 1124, 1089, 955, 866, 814, 760, 698 cm<sup>-1</sup>. **MS (EI<sup>+</sup>)** *m/z* (%): 347.3 (13) [M, <sup>35</sup>Cl]<sup>+</sup> = [C<sub>22</sub>H<sub>18</sub>ClNO]<sup>+</sup>, 292.3 (32) [M-C<sub>3</sub>H<sub>5</sub>O, <sup>37</sup>Cl]<sup>+</sup> = [C<sub>19</sub>H<sub>13</sub>ClN]<sup>+</sup>, 290.2 (100) [M-C<sub>3</sub>H<sub>5</sub>O, <sup>35</sup>Cl]<sup>+</sup> = [C<sub>19</sub>H<sub>13</sub>CIN]<sup>+</sup>. **HR-MS (ESI<sup>+</sup>)** *m/z* (%): calcd. for [M+H]<sup>+</sup> = [C<sub>22</sub>H<sub>19</sub>ClNO]<sup>+</sup>: 348.1150; found: 348.1149.

**(R)-1-(8-Fluoro-4-phenyl-1,10-dihydrobenzo[5,6]cyclohepta[1,2-*b*]pyrrol-10-yl)propan-2-one**  
**(17c)**

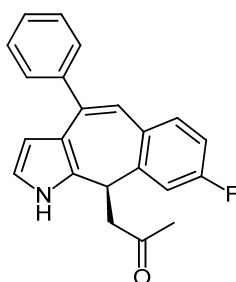

**17c**

Compound **17c** was isolated after flash chromatography (SiO<sub>2</sub>, Pentane/Et<sub>2</sub>O 2:1) as white foam (159.0 mg, 96%). **Molecular formula:** C<sub>22</sub>H<sub>18</sub>FNO. **Molecular mass:** 331.383 g mol<sup>-1</sup>. **R<sub>f</sub>**(Pentane/Et<sub>2</sub>O 2:1) = 0.27. **HPLC:** AS, 9/1 *n*-Heptane/EtOH, 0.7 ml/min, λ = 230 nm, τ<sub>minor</sub> = 10.4 min, τ<sub>major</sub> = 8.3 min.  $[\alpha]_D^{20} = +22.2$  (*c* = 0.5, CHCl<sub>3</sub>, 90% ee). **<sup>1</sup>H NMR** (400 MHz, CD<sub>2</sub>Cl<sub>2</sub>): δ = 1.92

(s, 3 H, Me), 2.60 (m, 1 H, CH<sub>2</sub>), 3.07 (dd,  $J = 9.5$  Hz,  $J = 17.4$  Hz, 1 H, CH<sub>2</sub>), 4.54 (dd,  $J = 5.1$  Hz,  $J = 9.3$  Hz, 1 H, CH), 5.93 (t,  $J = 2.8$  Hz, 1 H, ArH), 6.64 (t,  $J = 2.6$  Hz, 1 H, ArH), 6.86 (s, 1 H, CH), 6.93-7.02 (m, 2 H, ArH), 7.31-7.46 (m, 4 H, ArH), 7.55-7.63 (m, 2 H, ArH), 8.47 (s, 1 H, NH). <sup>13</sup>C{<sup>19</sup>F} NMR (100.572 MHz, CD<sub>2</sub>Cl<sub>2</sub>):  $\delta = 30.9$  (q), 41.3 (d), 45.1 (t), 110.0 (d), 113.7 (d), 115.5 (s), 117.0 (d), 117.4 (s), 123.8 (d), 128.1 (d), 128.7 (d, 2 C), 129.1 (d, 2 C), 131.4 (s), 132.5 (s), 133.0 (d), 138.1 (d), 140.4 (s), 143.4 (s), 163.2 (s), 207.8 (s). <sup>19</sup>F{<sup>1</sup>H} NMR (375 MHz, CD<sub>2</sub>Cl<sub>2</sub>):  $\delta = -116.12$ . IR (ATR):  $\tilde{\nu} = 3373, 3056, 3026, 2892, 2328, 2197, 2164, 2109, 1994, 1965, 1886, 1811, 1704, 1599, 1565, 1492, 1395, 1357, 1266, 1147, 1082, 1028, 975, 941, 867, 813, 763, 699$  cm<sup>-1</sup>. MS (EI<sup>+</sup>)  $m/z$  (%): 331.3 (16) [M]<sup>+</sup> = [C<sub>22</sub>H<sub>18</sub>FNO]<sup>+</sup>, 274.3 (100) [M-C<sub>3</sub>H<sub>5</sub>O]<sup>+</sup> = [C<sub>19</sub>H<sub>13</sub>FN]<sup>+</sup>. MS (CI<sup>+</sup>, methane)  $m/z$  (%): 332.3 (38) [M+H]<sup>+</sup> = [C<sub>22</sub>H<sub>19</sub>FNO]<sup>+</sup>, 331.3 (36) [M]<sup>+</sup> = [C<sub>22</sub>H<sub>18</sub>FNO]<sup>+</sup>, 312.4 (14) [M-F]<sup>+</sup> = [C<sub>22</sub>H<sub>18</sub>NO]<sup>+</sup>, 274.2 (100) [M-C<sub>3</sub>H<sub>5</sub>O]<sup>+</sup> = [C<sub>19</sub>H<sub>13</sub>FN]<sup>+</sup>. HR-MS (ESI<sup>+</sup>)  $m/z$  (%): calcd. for [M+Na]<sup>+</sup> = [C<sub>22</sub>H<sub>18</sub>FNNaO]<sup>+</sup>: 354.1262; found: 354.1261.

**(R)-1-(4-(3-Fluorophenyl)-1,10-dihydrobenzo[5,6]cyclohepta[1,2-b]pyrrol-10-yl)propan-2-one**  
**(17d)**

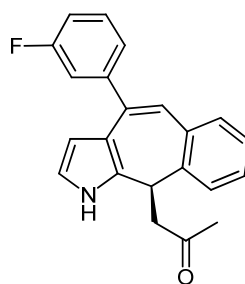

**17d**

Compound **17d** was isolated after flash chromatography (SiO<sub>2</sub>, Pentane/Et<sub>2</sub>O 2:1) as white foam (158.0 mg, 95%). **Molecular formula:** C<sub>22</sub>H<sub>18</sub>FNO. **Molecular mass:** 331.383 g mol<sup>-1</sup>. **R<sub>f</sub>**(Pentane/Et<sub>2</sub>O 2:1) = 0.23. **HPLC:** AS, 9/1 *n*-Heptane/EtOH, 1.0 ml/min,  $\lambda = 230$  nm,  $\tau_{minor} = 7.9$  min,  $\tau_{major} = 5.8$  min.  $[\alpha]_D^{20} = +12.9$  ( $c = 0.75$ , CHCl<sub>3</sub>, 93% ee). <sup>1</sup>H NMR (400 MHz, CD<sub>2</sub>Cl<sub>2</sub>):  $\delta = 1.90$  (s, 3 H, Me), 2.56 (dd,  $J = 4.7$  Hz,  $J = 17.5$  Hz, 1 H, CH<sub>2</sub>), 3.04 (dd,  $J = 9.5$  Hz,  $J = 17.4$  Hz, 1 H, CH<sub>2</sub>), 4.60 (dd,  $J = 5.0$  Hz,  $J = 9.4$  Hz, 1 H, CH), 5.95 (t,  $J = 2.7$  Hz, 1 H, ArH), 6.64 (t,  $J = 2.7$  Hz, 1 H, ArH), 6.91 (s, 1 H, CH), 7.01-7.11 (m, 1 H, ArH), 7.22-7.48 (m, 7 H, ArH), 8.54 (s, 1 H, NH). <sup>13</sup>C{<sup>19</sup>F} NMR (100 MHz, CD<sub>2</sub>Cl<sub>2</sub>):  $\delta = 30.9$  (q), 41.6 (d), 45.5 (t), 109.8 (d), 114.7 (d), 116.0 (d), 116.8 (s), 117.0 (d), 125.0 (d), 125.4 (d), 126.8 (d), 128.8 (d), 129.2 (d), 130.1 (d), 131.4 (d), 132.5 (s), 135.8 (s), 137.3 (s), 138.6 (s), 146.0 (s), 163.3 (s), 208.1 (s). <sup>19</sup>F{<sup>1</sup>H} NMR (375 MHz, CD<sub>2</sub>Cl<sub>2</sub>):  $\delta = -114.69$ . IR (ATR):  $\tilde{\nu} = 3362, 3018, 2925, 2645, 2322, 2099, 1930, 1700, 1577, 1475, 1373, 1173, 1091, 1018, 956, 857, 701$  cm<sup>-1</sup>. MS (EI<sup>+</sup>)  $m/z$  (%): 331.3 (12) [M]<sup>+</sup> = [C<sub>22</sub>H<sub>18</sub>FNO]<sup>+</sup>, 274.1 (100) [M-C<sub>3</sub>H<sub>5</sub>O]<sup>+</sup> = [C<sub>19</sub>H<sub>13</sub>FN]<sup>+</sup>. MS (CI<sup>+</sup>, methane)  $m/z$  (%): 332.4 (21) [M+H]<sup>+</sup> = [C<sub>22</sub>H<sub>19</sub>FNO]<sup>+</sup>, 331.4 (12) [M]<sup>+</sup> = [C<sub>22</sub>H<sub>18</sub>FNO]<sup>+</sup>, 275.4 (23), 274.3 (100) [M-C<sub>3</sub>H<sub>5</sub>O]<sup>+</sup> = [C<sub>19</sub>H<sub>13</sub>FN]<sup>+</sup>. HR-MS (ESI<sup>+</sup>)  $m/z$  (%): calcd. for [M+Na]<sup>+</sup> = [C<sub>22</sub>H<sub>18</sub>FNNaO]<sup>+</sup>: 354.1262; found: 354.1262.

**(R)-1-(4-Phenyl-1,12-dihydronaphtho[2',3':5,6]cyclohepta[1,2-b]pyrrol-12-yl)propan-2-one (17e)**

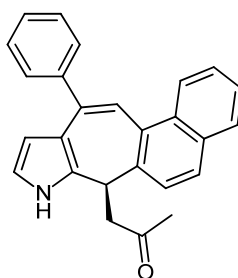

**17e**

Compound **17e** was isolated after flash chromatography (SiO<sub>2</sub>, Pentane/Et<sub>2</sub>O 2:1) as pale yellow foam (147.0 mg, 81%). **Molecular formula:** C<sub>26</sub>H<sub>21</sub>NO. **Molecular mass:** 363.451 g mol<sup>-1</sup>. **R<sub>f</sub>**(Pentane/Et<sub>2</sub>O 2:1) = 0.17. **Mp:** 73-75 °C. **HPLC:** IA, 95/5 *n*-Heptane/*i*PrOH, 0.7 ml/min, λ = 230 nm, τ<sub>minor</sub> = 16.1 min, τ<sub>major</sub> = 11.0 min. [α]<sub>D</sub><sup>20</sup> = +37.3 (c = 0.5, CHCl<sub>3</sub>, 93% ee). **<sup>1</sup>H NMR** (600 MHz, CD<sub>2</sub>Cl<sub>2</sub>): δ = 1.91 (s, 3 H, Me), 2.70 (dd, *J* = 2.9 Hz, *J* = 17.1 Hz, 1 H, CH<sub>2</sub>), 3.15 (dd, *J* = 9.0 Hz, *J* = 17.5 Hz, 1 H, CH<sub>2</sub>), 4.68-4.75 (m, 1 H, CH), 6.01 (m, 1 H, ArH), 6.66 (d, *J* = 2.5 Hz, 1 H, ArH), 7.40 (t, *J* = 7.3 Hz, 2 H, ArH), 7.45-7.51 (m, 3 H, ArH), 7.60 (t, *J* = 7.6 Hz, 1 H, ArH), 7.71 (s, 1 H, CH), 7.75 (d, *J* = 7.9 Hz, 2 H, ArH), 7.78 (d, *J* = 8.0 Hz, 1 H, ArH), 7.84 (d, *J* = 8.0 Hz, 1 H, ArH), 8.46-8.55 (m, 2 H, Ar, NH). **<sup>13</sup>C NMR** (150 MHz, CD<sub>2</sub>Cl<sub>2</sub>): 30.9 (q), 41.8 (d), 44.3 (t), 109.8 (d), 117.0 (d), 117.5 (s), 120.7 (d), 124.9 (d), 125.8 (d), 126.9 (d), 128.3 (d), 128.6 (d), 128.8 (d, 2 C), 128.9 (d), 129.2 (d), 129.4 (d, 2 C), 130.7 (s), 133.8 (s, 2 C), 133.4 (s), 137.7 (s), 139.7 (s), 144.1 (s), 208.2 (s). **IR** (ATR): ν̄ = 3854, 3749, 3633, 3411, 3053, 2922, 2675, 2490, 2302, 2221, 2177, 2149, 2125, 2056, 2028, 1986, 1944, 1895, 1847, 1816, 1703, 1590, 1551, 1489, 1391, 1355, 1269, 1236, 1154, 1080, 1031, 945, 889, 810, 767, 699 cm<sup>-1</sup>. **MS (EI<sup>+</sup>)** *m/z* (%): 363.2 (16) [M]<sup>+</sup> = [C<sub>26</sub>H<sub>21</sub>NO]<sup>+</sup>, 307.2 (24), 306.2 (100) [M-C<sub>3</sub>H<sub>5</sub>O]<sup>+</sup> = [C<sub>23</sub>H<sub>16</sub>N]<sup>+</sup>. **MS (CI<sup>+</sup>, methane)** *m/z* (%): 364.4 (41) [M+H]<sup>+</sup> = [C<sub>26</sub>H<sub>22</sub>NO]<sup>+</sup>, 363.2 (24) [M]<sup>+</sup> = [C<sub>26</sub>H<sub>21</sub>NO]<sup>+</sup>, 307.2 (25), 306.4 (100) [M-C<sub>3</sub>H<sub>5</sub>O]<sup>+</sup> = [C<sub>23</sub>H<sub>16</sub>N]<sup>+</sup>. **MS (ESI<sup>+</sup>)** *m/z* (%): 364.2 (40) [M+H]<sup>+</sup> = [C<sub>26</sub>H<sub>22</sub>NO]<sup>+</sup>, 306.1 (100) [M-C<sub>3</sub>H<sub>5</sub>O]<sup>+</sup> = [C<sub>23</sub>H<sub>16</sub>N]<sup>+</sup>. **HR-MS (ESI<sup>+</sup>)** *m/z* (%): calcd. for [M+H]<sup>+</sup> = [C<sub>26</sub>H<sub>22</sub>NO]<sup>+</sup>: 364.1696; found: 364.1712.

**(R)-1-(9-Phenyl-5,6-dihydro-[1,3]dioxolo[4'',5'':4',5']benzo[1',2':5,6]cyclohepta[1,2-b]pyrrol-5-yl)propan-2-one (17f)**

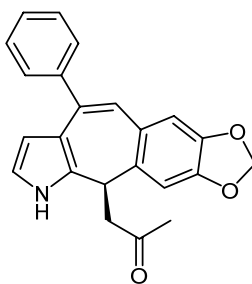

**17f**

Compound **17f** was isolated after flash chromatography (SiO<sub>2</sub>, Pentane/Et<sub>2</sub>O 2:1) as pale orange foam (172.1 mg, 96%). **Molecular formula:** C<sub>23</sub>H<sub>19</sub>NO<sub>3</sub>. **Molecular mass:** 357.402 g mol<sup>-1</sup>. **R<sub>f</sub>**(Pentane/Et<sub>2</sub>O 2:1) = 0.22. **Mp:** 67-70 °C. **HPLC:** OD, 9/1 *n*-Heptane/EtOH, 0.7 ml/min, λ = 230 nm, τ<sub>minor</sub> = 12.2 min, τ<sub>major</sub> = 16.1 min. [α]<sub>D</sub><sup>20</sup> = -3.30 (c = 1.1, CHCl<sub>3</sub>, 92% ee). **<sup>1</sup>H NMR** (600 MHz, CDCl<sub>3</sub>): δ = 1.93 (s, 3 H, Me), 2.50-2.63 (m, 1 H, CH<sub>2</sub>), 3.06 (dd, *J* = 9.4 Hz, *J* = 17.3 Hz, 1 H, CH<sub>2</sub>), 4.47 (dd, *J* = 4.8 Hz, *J* = 8.5 Hz, 1 H, CH), 5.91 (s, 1 H, CH<sub>2</sub>), 5.95 (s, 1 H, CH<sub>2</sub>), 5.97-6.00 (m, 1 H, ArH), 6.57-6.65 (m, 1 H, ArH), 6.71 (s, 1 H, ArH), 6.76 (s, 1 H, ArH), 6.87 (s, 1 H, CH), 7.31-7.47 (m, 3 H, ArH), 7.53-7.65 (m, 2 H, ArH), 8.32 (s, 1 H, NH). **<sup>13</sup>C NMR** (150 MHz, CD<sub>2</sub>Cl<sub>2</sub>): 31.0 (q), 41.8 (d), 45.2 (t), 101.4 (t), 108.9 (d), 109.7 (d), 110.3 (d), 116.4 (d), 117.0 (s), 124.2 (d), 127.5 (d), 128.3 (d, 2 C), 128.7 (d, 2 C), 129.9 (s), 131.2 (s), 131.9 (s), 136.7 (s), 143.1 (s), 146.3 (s), 148.0 (s), 208.4 (s). **IR** (ATR): ν̄ = 3396, 3056, 2921, 2769, 2659, 2333, 2144, 1863, 1703, 1621, 1597, 1564, 1482, 1371, 1278, 1221, 1155, 1123, 1081, 1035, 932, 877, 760 cm<sup>-1</sup>. **MS (EI<sup>+</sup>)** *m/z* (%): 357.2 (19) [M]<sup>+</sup> = [C<sub>23</sub>H<sub>19</sub>NO<sub>3</sub>]<sup>+</sup>, 301.2 (22), 300.2 (100) [M-C<sub>3</sub>H<sub>5</sub>O]<sup>+</sup> = [C<sub>20</sub>H<sub>14</sub>NO<sub>2</sub>]<sup>+</sup>. **MS (CI<sup>+</sup>, methane)** *m/z* (%): 359.4 (17), 358.3 (42) [M+H]<sup>+</sup> = [C<sub>23</sub>H<sub>20</sub>NO<sub>3</sub>]<sup>+</sup>, 301.3 (23), 300.3 (100) [M-C<sub>3</sub>H<sub>5</sub>O]<sup>+</sup> = [C<sub>20</sub>H<sub>14</sub>NO<sub>2</sub>]<sup>+</sup>. **MS (ESI<sup>+</sup>)** *m/z* (%): 380.1 (44) [M+Na]<sup>+</sup> = [C<sub>23</sub>H<sub>19</sub>NNaO]<sup>+</sup>, 358.1 (100) [M+H]<sup>+</sup> = [C<sub>23</sub>H<sub>20</sub>NO<sub>3</sub>]<sup>+</sup>, 328.1 (36) [M-CHO]<sup>+</sup> = [C<sub>22</sub>H<sub>18</sub>N]<sup>+</sup>, 300.1 (48) [M-C<sub>3</sub>H<sub>5</sub>O]<sup>+</sup> = [C<sub>20</sub>H<sub>14</sub>N]<sup>+</sup>. **HR-MS (ESI<sup>+</sup>)** *m/z* (%): calcd. for [M+H]<sup>+</sup> = [C<sub>23</sub>H<sub>20</sub>NO<sub>3</sub>]<sup>+</sup>: 358.1438; found: 358.1453.

**(R)-1-(2,4-Diphenyl-1,10-dihydrobenzo[5,6]cyclohepta[1,2-*b*]pyrrol-10-yl)propan-2-one (17g)**

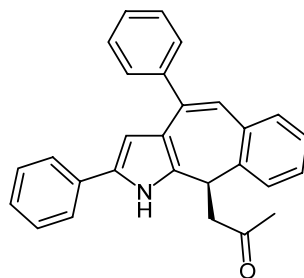

**17g**

Compound **17g** was isolated after flash chromatography (SiO<sub>2</sub>, Pentane/Et<sub>2</sub>O 2:1) as pale orange foam (186.1 mg, 96%). **Molecular formula:** C<sub>28</sub>H<sub>23</sub>NO. **Molecular mass:** 389.488 g mol<sup>-1</sup>. **R<sub>f</sub>**(Pentane/Et<sub>2</sub>O 2:1) = 0.29. **Mp:** 59-62 °C. **HPLC:** OD, 9/1 *n*-Heptane/EtOH, 1.0 ml/min, λ = 230 nm, τ<sub>minor</sub> = 5.2 min, τ<sub>major</sub> = 7.5 min. [α]<sub>D</sub><sup>20</sup> = +5.5 (c = 0.5, CHCl<sub>3</sub>, 85% ee). **<sup>1</sup>H NMR** (500 MHz, CDCl<sub>3</sub>): δ = 1.96 (s, 3 H, Me), 2.60 (dd, *J* = 4.5 Hz, *J* = 17.6 Hz, 1 H, CH<sub>2</sub>), 3.16 (dd, *J* = 9.6 Hz, *J* = 17.5 Hz, 1 H, CH<sub>2</sub>), 4.68 (dd, *J* = 4.7 Hz, *J* = 9.5 Hz, 1 H, CH), 6.28 (d, *J* = 2.6 Hz, 1 H, ArH), 6.93 (s, 1 H, CH), 7.10-7.20 (m, 1 H, ArH), 7.22-7.34 (m, 5 H, ArH), 7.35-7.49 (m, 6 H, ArH), 7.65 (dd, *J* = 1.2 Hz, *J* = 8.1 Hz, 2 H, ArH), 8.70 (s, 1 H, NH). **<sup>13</sup>C NMR** (150 MHz, CD<sub>3</sub>Cl): δ = 31.0 (q), 41.4 (d), 45.4 (t), 107.1 (d), 118.7 (d), 123.8 (d, 2 C), 125.1 (d), 126.3 (d), 126.5 (d), 127.7 (d), 128.4 (d, 3 C), 128.9 (d, 5 C), 130.7 (s), 131.1 (d), 132.5 (s), 133.0 (s), 135.7 (s), 137.6 (s), 137.8 (s), 143.0 (s), 208.3 (s). **IR** (ATR): ν̄ = 3350, 3056, 3022, 2925, 2660, 2322, 2087, 1929, 1702, 1600, 1559, 1522, 1481,

1448, 1358, 1297, 1240, 1208, 1163, 1122, 1076, 1028, 946, 946, 907, 881, 849, 812, 756, 694  $\text{cm}^{-1}$ .  
**MS (EI<sup>+</sup>)**  $m/z$  (%): 389.2 (14)  $[\text{M}]^+ = [\text{C}_{28}\text{H}_{23}\text{NO}]^+$ , 333.2 (27), 332.2 (100)  $[\text{M}-\text{C}_3\text{H}_5\text{O}]^+ = [\text{C}_{25}\text{H}_{18}\text{N}]^+$ .  
**HR-MS (ESI<sup>+</sup>)**  $m/z$  (%): calcd. for  $[\text{M}+\text{H}]^+ = [\text{C}_{28}\text{H}_{24}\text{NO}]^+$ : 390.1857; found: 390.1868.

**(R)-1-(4-Phenyl-2-(p-tolyl)-1,10-dihydrobenzo[5,6]cyclohepta[1,2-b]pyrrol-10-yl)propan-2-one (17h)**

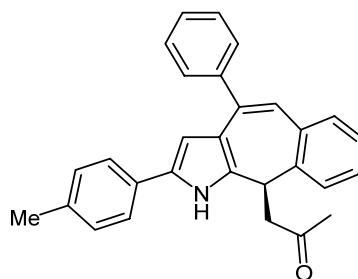

**17h**

Compound **17h** was isolated after flash chromatography ( $\text{SiO}_2$ , Pentane/ $\text{Et}_2\text{O}$  2:1) as pale orange foam (171.0 mg, 85%). **Molecular formula:**  $\text{C}_{29}\text{H}_{25}\text{NO}$ . **Molecular mass:** 403.515  $\text{g mol}^{-1}$ .  $R_f$ (Pentane/ $\text{Et}_2\text{O}$  2:1) = 0.29. **Mp:** 185-187  $^\circ\text{C}$ . **HPLC:** AD, 7/3 *n*-Heptane/*i*PrOH, 1.0 ml/min,  $\lambda = 230$  nm,  $\tau_{\text{minor}} = 7.7$  min,  $\tau_{\text{major}} = 4.5$  min.  $[\alpha]_{\text{D}}^{25} = -5.4$  ( $c = 0.5$ ,  $\text{CHCl}_3$ , 78% ee). **<sup>1</sup>H NMR** (400 MHz,  $\text{CDCl}_3$ ):  $\delta = 1.95$  (s, 3 H, Me), 2.31 (s, 3 H, Me), 2.60 (dd,  $J = 4.7$  Hz,  $J = 17.3$  Hz, 1 H,  $\text{CH}_2$ ), 3.15 (dd,  $J = 9.6$  Hz,  $J = 17.4$  Hz, 1 H,  $\text{CH}_2$ ), 4.67 (dd,  $J = 4.7$  Hz,  $J = 9.5$  Hz, 1 H, CH), 6.22 (d,  $J = 2.6$  Hz, 1 H, ArH), 6.92 (s, 1 H, CH), 7.11 (d,  $J = 7.9$  Hz, 2 H, ArH), 7.20-7.34 (m, 5 H, ArH), 7.34-7.49 (m, 4 H, ArH), 7.60-7.71 (m, 2 H, ArH), 8.64 (s, 1 H, NH). **<sup>13</sup>C NMR** (100 MHz,  $\text{CDCl}_3$ ):  $\delta = 21.2$  (q), 31.0 (q), 41.5 (d), 45.4 (t), 106.6 (d), 118.6 (s), 123.8 (d, 2 C), 125.0 (d), 126.5 (d), 127.7 (d), 128.4 (d, 3 C), 128.9 (d, 3 C), 129.6 (d, 2 C), 129.8 (s), 130.9 (s), 131.1 (d), 132.6 (s), 135.7 (s), 136.0 (s), 137.6 (s), 137.9 (s), 143.1 (s), 208.3 (s). **IR** (ATR):  $\tilde{\nu} = 3852, 3341, 3058, 3022, 2921, 2861, 2672, 2330, 2217, 2082, 1991, 1892, 1800, 1695, 1595, 1532, 1484, 1440, 1350, 1244, 1214, 1161, 1112, 1027, 941, 879, 850, 801, 747, 695$   $\text{cm}^{-1}$ . **MS (EI<sup>+</sup>)**  $m/z$  (%): 403.4 (17)  $[\text{M}]^+ = [\text{C}_{29}\text{H}_{25}\text{NO}]^+$ , 347.4 (29), 346.3 (100)  $[\text{M}-\text{C}_3\text{H}_5\text{O}]^+ = [\text{C}_{26}\text{H}_{20}\text{N}]^+$ . **MS (ESI<sup>+</sup>)**  $m/z$  (%): 404.2 (50)  $[\text{M}+\text{H}]^+ = [\text{C}_{29}\text{H}_{26}\text{NO}]^+$ , 346.2 (100)  $[\text{M}-\text{C}_3\text{H}_5\text{O}]^+ = [\text{C}_{26}\text{H}_{20}\text{N}]^+$ . **HR-MS (ESI<sup>+</sup>)**  $m/z$  (%): calcd. for  $[\text{M}+\text{H}]^+ = [\text{C}_{29}\text{H}_{26}\text{NO}]^+$ : 404.2009; found: 404.2019.

**(R)-1-(2-(4-Methoxyphenyl)-4-phenyl-1,10-dihydrobenzo[5,6]cyclohepta[1,2-b]pyrrol-10-yl)propan-2-one (17i)**

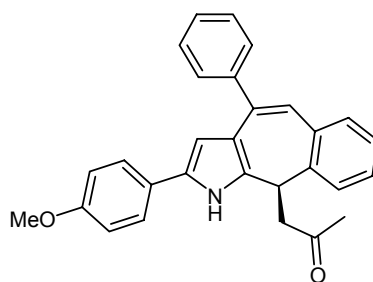

17i

Compound **17i** was isolated after flash chromatography (SiO<sub>2</sub>, Pentane/Et<sub>2</sub>O 2:1) as orange solid (185.0 mg, 73%). **Molecular formula:** C<sub>29</sub>H<sub>25</sub>NO<sub>2</sub>. **Molecular mass:** 419.514 g mol<sup>-1</sup>. **R<sub>f</sub>**(Pentane/Et<sub>2</sub>O 2:1) = 0.16. **Mp:** 98-102 °C. **HPLC:** AD, 7/3 *n*-Heptane/*i*PrOH, 1.0 ml/min, λ = 230 nm, τ<sub>minor</sub> = 11.2 min, τ<sub>major</sub> = 5.4 min. [α]<sub>D</sub><sup>20</sup> = -8.8 (c = 0.6, CHCl<sub>3</sub>, 73% ee). **<sup>1</sup>H NMR** (400 MHz, CDCl<sub>3</sub>): δ = 1.93 (s, 3 H, Me), 2.62 (dd, *J* = 4.5 Hz, *J* = 17.5 Hz, 1 H, CH<sub>2</sub>), 3.12 (dd, *J* = 9.4 Hz, *J* = 17.5 Hz, 1 H, CH<sub>2</sub>), 3.77 (s, 3 H, OMe), 4.65 (dd, *J* = 4.9 Hz, *J* = 9.2 Hz, 1 H, CH), 6.13 (d, *J* = 2.7 Hz, 1 H, ArH), 6.84-6.88 (m, 2 H, ArH), 6.92 (s, 1 H, CH), 7.23-7.49 (m, 9 H, ArH), 7.63-7.68 (m, 2 H, ArH), 8.74 (s, 1 H, NH). **<sup>13</sup>C NMR** (100 MHz, CDCl<sub>3</sub>): δ = 31.0 (q), 41.7 (d), 45.9 (t), 55.8 (q), 106.1 (d), 114.8 (d, 2 C), 118.8 (s), 125.2 (d), 125.5 (d, 2 C), 125.9 (s), 126.7 (d), 128.0 (d), 128.6 (d), 128.7 (d, 2 C), 129.2 (d, 3 C), 131.0 (s), 131.4 (d), 133.0 (s), 136.1 (s), 138.3 (s, 2 C), 143.5 (s), 158.9 (s), 208.4 (s). **IR** (ATR): ν̄ = 3856, 3610, 3351, 3054, 3015, 2934, 2834, 2673, 2330, 2176, 2088, 1915, 1702, 1582, 1528, 1487, 1438, 1357, 1276, 1244, 1176, 1109, 1028, 946, 913, 880, 856, 831, 798, 760, 699, 671 cm<sup>-1</sup>. **MS (EI<sup>+</sup>)** *m/z* (%): 419.2 (16) [M]<sup>+</sup> = [C<sub>29</sub>H<sub>25</sub>NO<sub>2</sub>]<sup>+</sup>, 363.2 (27), 362.2 (100) [M-C<sub>3</sub>H<sub>5</sub>O]<sup>+</sup> = [C<sub>26</sub>H<sub>20</sub>NO]<sup>+</sup>. **MS (ESI<sup>+</sup>)** *m/z* (%): 420.2 (72) [M+H]<sup>+</sup> = [C<sub>29</sub>H<sub>26</sub>NO<sub>2</sub>]<sup>+</sup>, 362.2 (100) [M-C<sub>3</sub>H<sub>5</sub>O]<sup>+</sup> = [C<sub>26</sub>H<sub>20</sub>N]<sup>+</sup>. **HR-MS (ESI<sup>+</sup>)** *m/z* (%): calcd. for [M+H]<sup>+</sup> = [C<sub>29</sub>H<sub>26</sub>NO<sub>2</sub>]<sup>+</sup>: 420.1958; found: 420.1966.

**(R)-1-(2-(4-fluorophenyl)-4-phenyl-1,10-dihydrobenzo[5,6]cyclohepta[1,2-b]pyrrol-10-yl)propan-2-one (17j)**

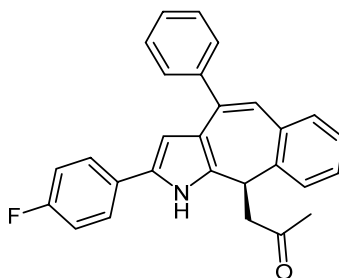

17j

Compound **17j** was isolated after flash chromatography (SiO<sub>2</sub>, Pentane/Et<sub>2</sub>O 2:1) as yellow foam (173.0 mg, 85%). **Molecular formula:** C<sub>28</sub>H<sub>22</sub>FNO. **Molecular mass:** 407.479g mol<sup>-1</sup>. **R<sub>f</sub>**(Pentane/Et<sub>2</sub>O 2:1) = 0.26. **Mp:** 87-91 °C. **HPLC:** AD, 7/3 *n*-Heptane/*i*PrOH, 1.0 ml/min, λ = 230



nm,  $\tau_{minor} = 6.9$  min,  $\tau_{major} = 4.4$  min.  $[\alpha]_D^{25} = +25.9$  ( $c = 0.7$ ,  $\text{CHCl}_3$ , 84% ee).  $^1\text{H NMR}$  (400 MHz,  $\text{CDCl}_3$ ):  $\delta = 1.96$  (s, 3 H, Me), 2.63 (dd,  $J = 4.7$  Hz,  $J = 17.4$  Hz, 1 H,  $\text{CH}_2$ ), 3.17 (dd,  $J = 9.5$  Hz,  $J = 17.4$  Hz, 1 H,  $\text{CH}_2$ ), 4.74 (dd,  $J = 4.8$  Hz,  $J = 9.4$  Hz, 1 H, CH), 6.19 (d,  $J = 2.6$  Hz, 1 H, ArH), 6.88-7.00 (m, 3 H, ArH, CH), 7.18-7.35 (m, 5 H, ArH), 7.35-7.50 (m, 4 H, ArH), 7.61-7.70 (m, 2 H, ArH), 9.03 (s, 1 H, NH).  $^{13}\text{C}\{^{19}\text{F}\}$  NMR (100 MHz,  $\text{CDCl}_3$ ):  $\delta = 31.0$  (q), 41.4 (d), 45.3 (t), 106.9 (d), 115.7 (d, 2 C), 118.6 (s), 125.1 (d), 125.4 (d, 2 C), 126.5 (d), 127.7 (d), 128.3 (d), 128.4 (d, 2 C), 128.8 (d, 3 C), 128.9 (s), 129.9 (s), 131.4 (d), 132.9 (s), 135.6 (s), 137.5 (s), 137.8 (s), 143.0 (s), 161.5 (s), 208.8 (s).  $^{19}\text{F}\{^1\text{H}\}$  NMR (375 MHz,  $\text{CDCl}_3$ ):  $\delta = -116.33$ . IR (ATR):  $\tilde{\nu} = 3637, 3368, 3054, 2922, 2669, 2327, 2218, 2087, 1887, 1816, 1700, 1582, 1526, 1484, 1428, 1359, 1299, 1225, 1158, 1097, 1026, 946, 913, 880, 813, 759, 698$   $\text{cm}^{-1}$ . MS ( $\text{EI}^+$ )  $m/z$  (%): 407.2 (14)  $[\text{M}]^+ = [\text{C}_{28}\text{H}_{22}\text{FNO}]^+$ , 351.2 (26), 350.2 (100)  $[\text{M}-\text{C}_3\text{H}_5\text{O}]^+ = [\text{C}_{25}\text{H}_{17}\text{FN}]^+$ . MS ( $\text{ESI}^+$ )  $m/z$  (%): 408.2 (90)  $[\text{M}+\text{H}]^+ = [\text{C}_{28}\text{H}_{23}\text{FNO}]^+$ , 350.1 (100)  $[\text{M}-\text{C}_3\text{H}_5\text{O}]^+ = [\text{C}_{25}\text{H}_{17}\text{FN}]^+$ . HR-MS ( $\text{ESI}^+$ )  $m/z$  (%): calcd. for  $[\text{M}+\text{H}]^+ = [\text{C}_{28}\text{H}_{23}\text{FNO}]^+$ : 408.1764; found: 408.1772.

**(R)-1-(2-(4-Chlorophenyl)-4-phenyl-1,10-dihydrobenzo[5,6]cyclohepta[1,2-b]pyrrol-10-yl)propan-2-one (17k)**

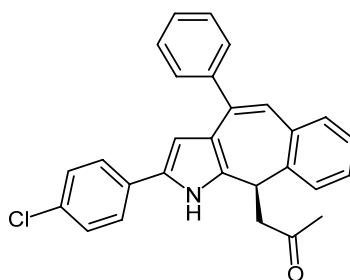

17k

Compound **17k** was isolated after flash chromatography ( $\text{SiO}_2$ , Pentane/ $\text{Et}_2\text{O}$  2:1) as yellow foam (162.1 mg, 76%). **Molecular formula:**  $\text{C}_{28}\text{H}_{22}\text{ClNO}$ . **Molecular mass:** 423.933  $\text{g mol}^{-1}$ .  $R_f$ (Pentane/ $\text{Et}_2\text{O}$  2:1) = 0.27. **Mp:** 195-198  $^\circ\text{C}$ . **HPLC:** IA, 7/3 *n*-Heptane/*i*PrOH, 0.7 ml/min,  $\lambda = 230$  nm,  $\tau_{minor} = 8.5$  min,  $\tau_{major} = 6.9$  min.  $[\alpha]_D^{25} = +6.6^\circ$  ( $c = 0.5$ ,  $\text{CHCl}_3$ , 86% ee).  $^1\text{H NMR}$  (400 MHz,  $\text{CD}_2\text{Cl}_2$ ):  $\delta = 1.95$  (s, 3 H, Me), 2.65 (dd,  $J = 4.0$  Hz,  $J = 16.0$  Hz, 1 H,  $\text{CH}_2$ ), 3.17 (dd,  $J = 9.5$  Hz,  $J = 17.6$  Hz, 1 H,  $\text{CH}_2$ ), 4.74 (dd,  $J = 4.7$  Hz,  $J = 9.0$  Hz, 1 H, CH), 6.23 (d,  $J = 2.2$  Hz, 1 H, ArH), 6.96 (s, 1 H, CH), 7.18-7.31 (m, 7 H, ArH), 7.34-7.41 (m, 1 H, ArH), 7.45 (t,  $J = 7.3$  Hz, 3 H, ArH), 7.65 (d,  $J = 7.3$  Hz, 2 H, ArH), 9.28 (s, 1 H, NH).  $^{13}\text{C NMR}$  (100 MHz,  $\text{CD}_2\text{Cl}_2$ ):  $\delta = 31.2$  (q), 41.7 (d), 45.5 (t), 107.7 (d), 119.2 (s), 125.3 (d, 2 C), 125.5 (d), 126.9 (d), 128.2 (d), 128.8 (d, 3 C), 129.2 (d, 3 C), 129.3 (d, 2 C), 130.0 (s), 131.5 (d), 131.6 (s), 131.8 (s), 134.1 (s), 136.1 (s), 138.1 (s), 138.2 (s), 143.3 (s), 209.1 (s). IR (ATR):  $\tilde{\nu} = 3857, 3632, 3344, 3054, 3021, 2924, 2668, 2326, 2088, 1984, 1917, 1701, 1595, 1518, 1479, 1418, 1357, 1298, 1211, 1164, 1090, 1013, 945, 911, 880, 811, 757, 697$   $\text{cm}^{-1}$ . MS ( $\text{EI}^+$ )  $m/z$  (%): 423.2 (13)  $[\text{M}, ^{35}\text{Cl}]^+ = [\text{C}_{28}\text{H}_{22}\text{ClNO}]^+$ , 368.1 (28)  $[\text{M}-\text{C}_3\text{H}_5\text{O}, ^{37}\text{Cl}]^+ = [\text{C}_{25}\text{H}_{17}\text{ClN}]^+$ , 366.1 (100)  $[\text{M}-\text{C}_3\text{H}_5\text{O}, ^{35}\text{Cl}]^+ = [\text{C}_{25}\text{H}_{17}\text{ClN}]^+$ . MS ( $\text{CI}^+$ , methane)  $m/z$  (%): 426.4 (43)  $[\text{M}+\text{H}, ^{37}\text{Cl}]^+$

= [C<sub>28</sub>H<sub>23</sub>CINO]<sup>+</sup>, 425.4 (41) [M, <sup>37</sup>Cl]<sup>+</sup> = [C<sub>28</sub>H<sub>22</sub>CINO]<sup>+</sup>, 424.4 (100) [M+H, <sup>35</sup>Cl]<sup>+</sup> = [C<sub>28</sub>H<sub>23</sub>CINO]<sup>+</sup>, 423.3 (50) [M, <sup>35</sup>Cl]<sup>+</sup> = [C<sub>28</sub>H<sub>23</sub>CINO]<sup>+</sup>, 368.3 (33) [M-C<sub>3</sub>H<sub>5</sub>O, <sup>37</sup>Cl]<sup>+</sup> = [C<sub>25</sub>H<sub>18</sub>CIN]<sup>+</sup>, 366.3 (94) [M-C<sub>3</sub>H<sub>5</sub>O, <sup>35</sup>Cl]<sup>+</sup> = [C<sub>25</sub>H<sub>18</sub>CIN]<sup>+</sup>. **MS (ESI<sup>+</sup>)** *m/z* (%): 462.1 (8) [M+K, <sup>35</sup>Cl]<sup>+</sup> = [C<sub>28</sub>H<sub>22</sub>ClKNO]<sup>+</sup>, 446.1 (32) [M+Na, <sup>35</sup>Cl]<sup>+</sup> = [C<sub>28</sub>H<sub>22</sub>CINNaO]<sup>+</sup>, 424.1 (81) [M+H, <sup>35</sup>Cl]<sup>+</sup> = [C<sub>28</sub>H<sub>23</sub>CINO]<sup>+</sup>, 366.1 (100) [M-C<sub>3</sub>H<sub>5</sub>O, <sup>35</sup>Cl]<sup>+</sup> = [C<sub>25</sub>H<sub>17</sub>CIN]<sup>+</sup>. **HR-MS (ESI<sup>+</sup>)** *m/z* (%): calcd. for [M+H]<sup>+</sup> = [C<sub>28</sub>H<sub>23</sub>CINO]<sup>+</sup>: 424.1463; found: 424.1480.

**(R)-1-(2-(Naphthalen-2-yl)-4-phenyl-1,10-dihydrobenzo[5,6]cyclohepta[1,2-*b*]pyrrol-10-yl)propan-2-one (171)**

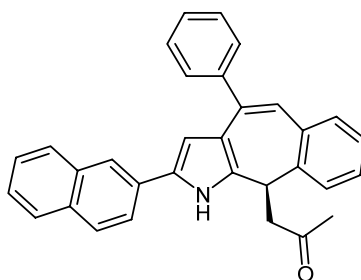

171

Compound **171** was isolated after flash chromatography (SiO<sub>2</sub>, Pentane/Et<sub>2</sub>O 2:1) as red foam (154.3 mg, 70%). **Molecular formula:** C<sub>32</sub>H<sub>25</sub>NO. **Molecular mass:** 439.547 g mol<sup>-1</sup>. **R<sub>f</sub>**(Pentane/Et<sub>2</sub>O 2:1) = 0.31. **Mp:** 128-132 °C. **HPLC:** IA, 7/3 *n*-Heptane/*i*PrOH, 1.0 ml/min, λ = 230 nm, τ<sub>minor</sub> = 7.5 min, τ<sub>major</sub> = 4.7 min. [α]<sub>D</sub><sup>20</sup> = -3.9 (*c* = 0.5, CHCl<sub>3</sub>, 81% ee). **<sup>1</sup>H NMR** (400 MHz, CDCl<sub>3</sub>): δ = 1.98 (s, 3 H, Me), 2.63 (dd, *J* = 4.5 Hz, *J* = 17.6 Hz, 1 H, CH<sub>2</sub>), 3.20 (dd, *J* = 9.7 Hz, *J* = 17.5 Hz, 1 H, CH<sub>2</sub>), 4.74 (dd, *J* = 4.7 Hz, *J* = 9.7 Hz, 1 H, CH), 6.40 (d, *J* = 2.6 Hz, 1 H, ArH), 6.95 (s, 1 H, CH), 7.25-7.33 (m, 3 H, ArH), 7.35-7.50 (m, 6 H, ArH), 7.51-7.57 (m, 1 H, ArH), 7.65-7.70 (m, 2 H, ArH), 7.72-7.82 (m, 4 H, ArH), 9.28 (s, 1 H, NH). **<sup>13</sup>C NMR** (100 MHz, CDCl<sub>3</sub>): δ = 31.0 (q), 41.5 (d), 45.4 (t), 107.8 (d), 118.9 (s), 121.0 (d), 123.1 (d), 125.2 (d), 125.4 (d), 126.5 (d, 2 C), 127.8 (d, 3 C), 128.4 (d, 3 C), 128.6 (d), 128.9 (d, 3 C), 129.9 (s), 130.8 (s), 131.2 (d), 132.2 (s), 133.4 (s), 133.9 (s), 135.7 (s), 137.5 (s), 137.8 (s), 143.0 (s), 208.3 (s). **IR** (ATR): ν̄ = 3890, 3728, 3636, 3347, 3047, 2923, 2657, 2547, 2324, 2222, 2057, 1928, 1703, 1601, 1481, 1359, 1240, 1161, 1026, 945, 854, 806, 752, 697 cm<sup>-1</sup>. **MS (EI<sup>+</sup>)** *m/z* (%): 439.3 (10) [M]<sup>+</sup> = [C<sub>32</sub>H<sub>25</sub>NO]<sup>+</sup>, 383.2 (21), 382.2 (100) [M-C<sub>3</sub>H<sub>5</sub>O]<sup>+</sup> = [C<sub>29</sub>H<sub>20</sub>N]<sup>+</sup>. **MS (ESI<sup>+</sup>)** *m/z* (%): 440.2 (32) [M+H]<sup>+</sup> = [C<sub>32</sub>H<sub>26</sub>NO]<sup>+</sup>: 382.2 (100) [M-C<sub>3</sub>H<sub>5</sub>O]<sup>+</sup> = [C<sub>29</sub>H<sub>20</sub>N]<sup>+</sup>. **HR-MS (ESI<sup>+</sup>)** *m/z* (%): calcd. for [M+H]<sup>+</sup> = [C<sub>32</sub>H<sub>26</sub>NO]<sup>+</sup>: 440.2009; found: 440.2017.0078

**(R)-1-((R/S)-8-Chloro-4-phenyl-1,10-dihydrobenzo[5,6]cyclohepta[1,2-*b*]pyrrol-10-yl)propan-2-ol (18)**

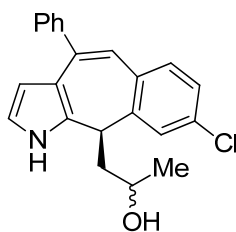

**18**

A solution of **17b** (157.1 mg, 0.45 mmol) in MeOH (2 mL) was added slowly to a solution of sodium borohydride (17.2 mg, 0.45 mmol) in MeOH (3 mL) at  $-78\text{ }^{\circ}\text{C}$ . The reaction was allowed to warm to room temperature, water was added, and the layers were separated. The organic layer was extracted with DCM, the combined organic layers dried over  $\text{MgSO}_4$ , and the solvent was removed *in vacuo*. The crude product was purified by flash chromatography ( $\text{SiO}_2$ , Pentane/ $\text{Et}_2\text{O}$  1:2) to yield **18** (150 mg, 95%, 64:36 d.r) as white foam.

**Molecular formula:**  $\text{C}_{22}\text{H}_{20}\text{ClNO}$ . **Molecular mass:**  $349.853\text{ g mol}^{-1}$ . **R<sub>f</sub>**(Pentane/ $\text{Et}_2\text{O}$  1:2) = 0.31. **Mp:**  $80\text{--}82\text{ }^{\circ}\text{C}$  (main diastereomer). **HPLC:** IC, 97/3 *n*-Heptane/*i*PrOH, 0.3 ml/min,  $\lambda = 230\text{ nm}$ , main diastereomer:  $\tau_{\text{minor}} = 12.6\text{ min}$ ,  $\tau_{\text{major}} = 21.2\text{ min}$ ; minor diastereomer:  $\tau_{\text{minor}} = 10.0\text{ min}$ ,  $\tau_{\text{major}} = 11.7\text{ min}$ .  $[\alpha]_{\text{D}}^{20} = +120.2$  ( $c = 0.5$ ,  $\text{CHCl}_3$ , 92% ee).  **$^1\text{H NMR}$**  (400 MHz,  $\text{CDCl}_3$ ):  $\delta = 1.05$  (d,  $J = 6.2\text{ Hz}$  3 H, Me), 1.55–1.91 (m, 2 H,  $\text{CH}_2$ , OH), 1.92–2.03 (m, 1 H,  $\text{CH}_2$ ), 3.41–3.54 (m, 1 H, CH), 4.27 (dd,  $J = 17.4\text{ Hz}$ ,  $J = 6.4\text{ Hz}$ , 1 H, CH), 6.01 (t,  $J = 2.7\text{ Hz}$ , 1 H, ArH), 6.62 (t,  $J = 2.7\text{ Hz}$ , 1 H, ArH), 6.80 (s, 1 H, CH). 7.18–7.22 (dd,  $J = 8.2\text{ Hz}$ ,  $J = 2.2\text{ Hz}$ , 1 H, ArH), 7.24–7.26 (m, 1 H, ArH), 7.32–7.38 (m, 2 H, ArH), 7.38–7.44 (m, 2 H, ArH), 7.58–7.64 (m, 2 H, ArH), 8.44 (s, 1 H, NH).  **$^{13}\text{C NMR}$**  (100 MHz,  $\text{CDCl}_3$ ):  $\delta = 24.4$  (q), 39.6 (t), 42.7 (d), 65.6 (d), 110.2 (d), 116.3 (d), 117.5 (s), 123.3 (d), 126.2 (d), 127.7 (d), 128.3 (d, 2 C), 128.8 (d, 3 C), 131.8 (s), 132.4 (d), 133.3 (s), 134.2 (s), 138.5 (s), 139.5 (s), 143.0 (s). **IR** (ATR):  $\tilde{\nu} = 3838, 3558, 3410, 3020, 2963, 2658, 2324, 2102, 1896, 1739, 1588, 1477, 1373, 1213, 1074, 1011, 927, 864, 814, 757, 698\text{ cm}^{-1}$ . **HR-MS (ESI<sup>+</sup>)**  $m/z$  (%): calcd. for  $[\text{M}+\text{H}]^+ = [\text{C}_{22}\text{H}_{21}\text{ClNO}]^+$ : 350.1306; found: 350.1304.

Sample Name: DM 133 rac  
 Data file: D:\ERNIE\DM\133RAS.D  
 Sample Info: Laufmittel: n-Heptan/EtOH 9:1;  
 Die Probe ist in DCM/LM gelöst

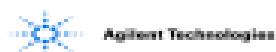

Säule: DAICELAS.M  
 Säuleninfo: Chiralpak AS (250 x 4.6)mm 10µ

Operator: Analytik Labor AKEN

Injektion Time: 14:55:16  
 Injektion Date: 28.01.2013

| Instrument Conditions: | At Start | At Stop |
|------------------------|----------|---------|
| Temperature in °C:     | 30.0     | 30.0    |
| Pressure in bar:       | 32.0     | 31.6    |
| Flow in ml/min:        | 1.0      | 1.0     |

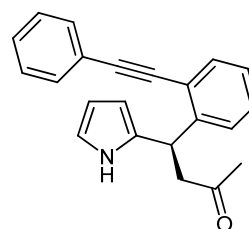

**3**

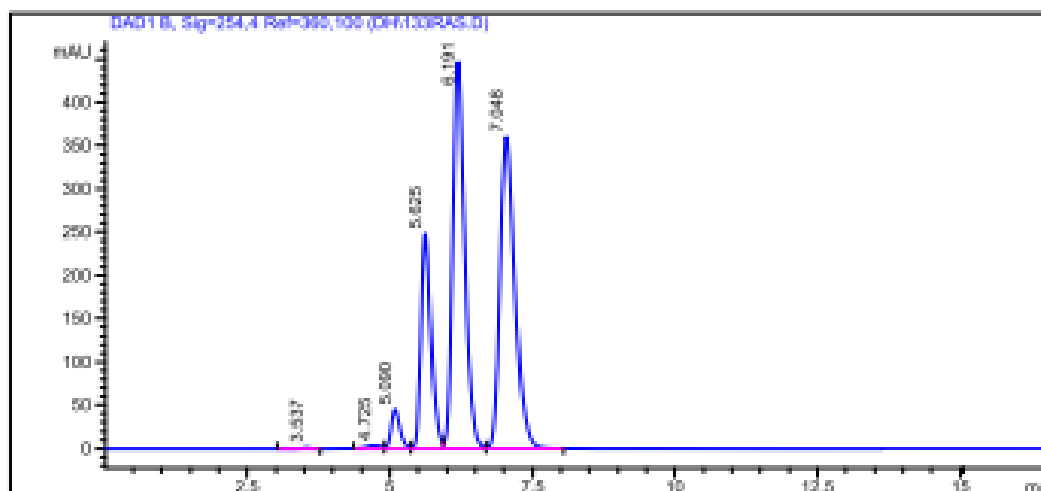

| #     | Ret. Time (min) | Width | Height (mAU) | Area (mAU*s) | Area % |
|-------|-----------------|-------|--------------|--------------|--------|
| 1     | 3.54            | 0.11  | 1.87         | 14.22        | 0.09   |
| 2     | 4.73            | 0.31  | 3.68         | 74.26        | 0.45   |
| 3     | 5.09            | 0.16  | 44.85        | 487.55       | 2.93   |
| 4     | 5.62            | 0.18  | 247.88       | 2953.65      | 17.78  |
| 5     | 6.19            | 0.23  | 447.78       | 6544.70      | 39.40  |
| 6     | 7.05            | 0.28  | 359.67       | 6538.16      | 39.36  |
| Total |                 |       |              | 16612.54     | 100.00 |

Sample Name: DH 328  
 Data file: D:\ERNIE\DH\328AS.D  
 Sample Info: Laufmittel: n-Heptan/EtOH 9:1;  
 Die Probe ist in DCM/LM gelöst

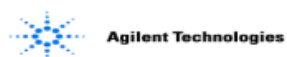

Säule: DAICELAS.M  
 Säuleninfo: Chiralpak AS (250 x 4.6)mm 10µ

Operator: Analytik Labor AKEN

Injektion Time: 13:28:50  
 Injektion Date: 08.07.2013

Instrument Conditions: At Start At Stop

Temperature in °C: 30.0 30.0  
 Pressure in bar: 30.8 30.8  
 Flow in ml/min: 1.0 1.0

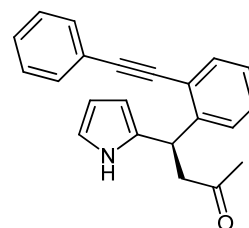

**3**

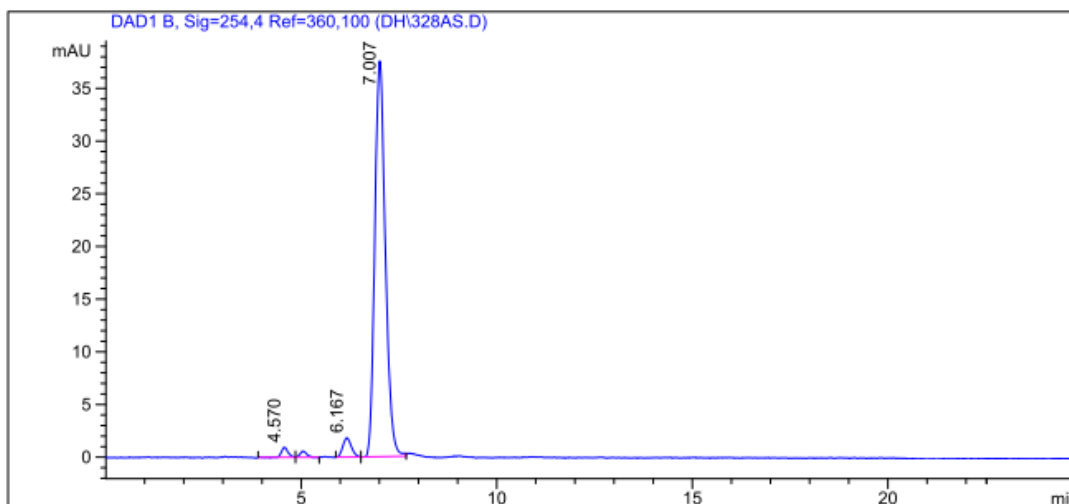

| #     | Ret. Time (min) | Width | Height (mAU) | Area (mAU*s) | Area % |
|-------|-----------------|-------|--------------|--------------|--------|
| 1     | 4.57            | 0.17  | 0.95         | 11.28        | 1.50   |
| 2     | 5.04            | 0.16  | 0.59         | 6.94         | 0.92   |
| 3     | 6.17            | 0.24  | 1.83         | 27.92        | 3.71   |
| 4     | 7.01            | 0.29  | 37.56        | 706.21       | 93.87  |
| Total |                 |       |              | 752.35       | 100.00 |

Sample Name: DH 195 rac  
 Data file: D:\GONZO\DH\195R10D.D  
 Sample Info: Laufmittel: n-Heptan/IP 9:1;  
 Die Probe ist in DCM/LM gelöst.

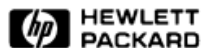

Säule: DAICELOD.M  
 Säuleninfo: Chiralcel OD (250x4,6)mm  
 Operator: Analytik Labor AKEN

Injektion Time: 15:13:38  
 Injektion Date: 01.03.2013

Instrument Conditions: At Start At Stop  
 Temperature in °C: 30.0°C 30.0°C  
 Pressure in bar: 32.9 34.1  
 Flow in ml/min: 1.00 1.00

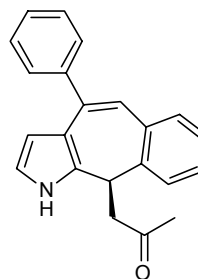

17a

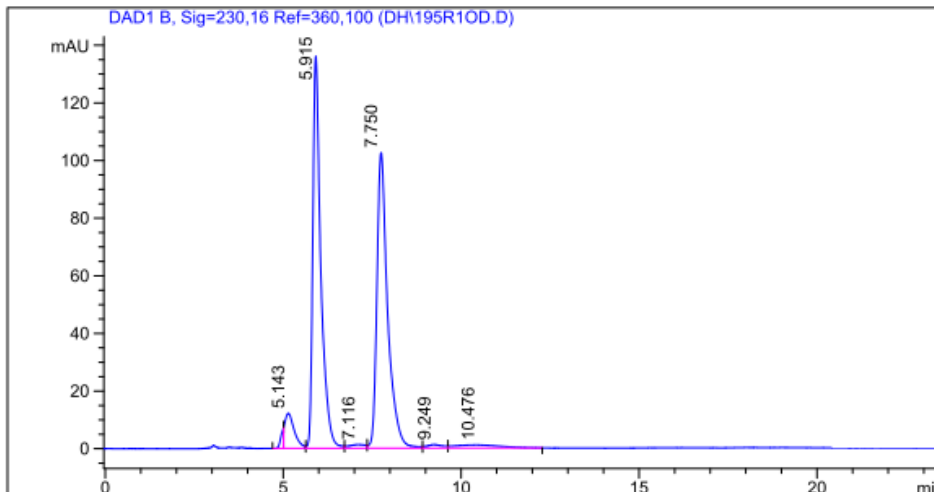

| #     | Ret. Time (min) | Width | Height (mAU) | Area (mAU*s) | Area % |
|-------|-----------------|-------|--------------|--------------|--------|
| 1     | 4.95            | 0.11  | 4.62         | 37.04        | 0.79   |
| 2     | 5.14            | 0.28  | 12.19        | 225.51       | 4.78   |
| 3     | 5.91            | 0.23  | 136.10       | 2128.30      | 45.11  |
| 4     | 7.12            | 0.42  | 1.28         | 40.64        | 0.86   |
| 5     | 7.75            | 0.31  | 102.56       | 2151.49      | 45.60  |
| 6     | 9.25            | 0.41  | 1.22         | 37.79        | 0.80   |
| 7     | 10.48           | 1.05  | 1.10         | 97.54        | 2.07   |
| Total |                 |       |              | 4718.31      | 100.00 |

->

Sample Name: DH 338  
 Data file: D:\GONZO\DH\338OD.D  
 Sample Info: Laufmittel: n-Heptan/IP 9:1;  
 Die Probe ist in DCM/LM gelöst.

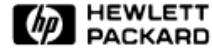

Säule: DAICELOD.M  
 Säuleninfo: Chiralcel OD (250x4,6)mm  
 Operator: Analytik Labor AKEN

Injektion Time: 13:34:38  
 Injektion Date: 23.07.2013

|                        |          |         |
|------------------------|----------|---------|
| Instrument Conditions: | At Start | At Stop |
| Temperature in °C:     | 30.0 °C  | 30.0 °C |
| Pressure in bar:       | 26.1     | 26.8    |
| Flow in ml/min:        | 1.00     | 1.00    |

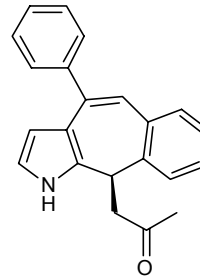

17a

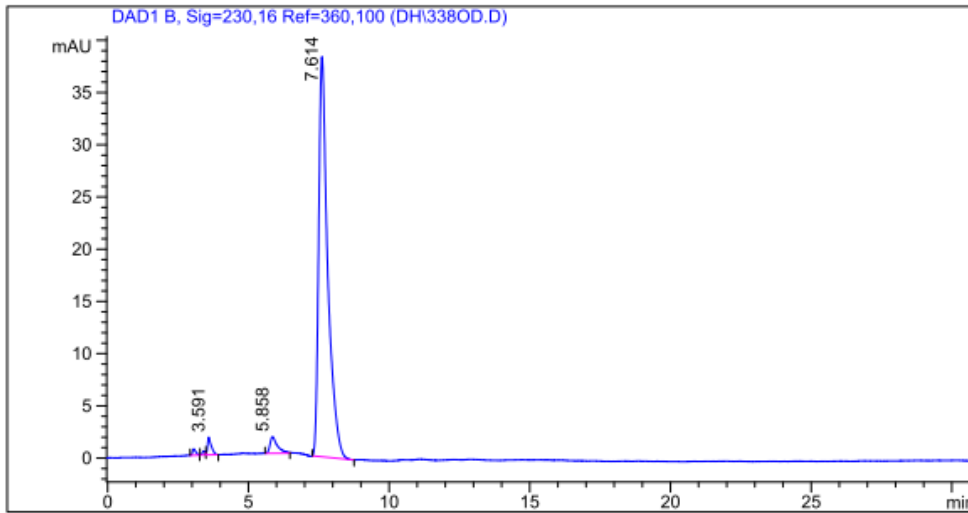

| #     | Ret. Time (min) | Width | Height (mAU) | Area (mAU*s) | Area % |
|-------|-----------------|-------|--------------|--------------|--------|
| 1     | 3.06            | 0.13  | 0.62         | 5.33         | 0.58   |
| 2     | 3.41            | 0.12  | 0.39         | 2.96         | 0.32   |
| 3     | 3.59            | 0.13  | 1.71         | 15.78        | 1.73   |
| 4     | 5.86            | 0.26  | 1.59         | 29.13        | 3.20   |
| 5     | 7.61            | 0.33  | 38.32        | 858.42       | 94.17  |
| Total |                 |       |              | 911.61       | 100.00 |

Sample Name: DH JH 42 rac  
 Data file: D:\ERNIE\DH\JH42RAS.D  
 Sample Info: Laufmittel: n-Heptan/EtOH 9:1;  
 Die Probe ist in DCM/LM gelöst

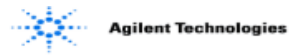

Säule: DAICELAS.M  
 Säuleninfo: Chiralpak AS (250 x 4.6)mm 10µ

Operator: Analytik Labor AKEN

Injektion Time: 08:07:42  
 Injektion Date: 05.07.2013

Instrument Conditions: At Start At Stop

Temperature in °C: 30.0 30.0  
 Pressure in bar: 21.8 22.0  
 Flow in ml/min: 0.7 0.7

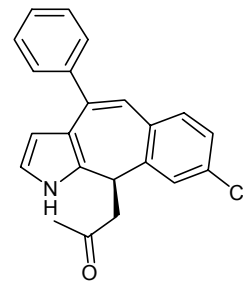

17b

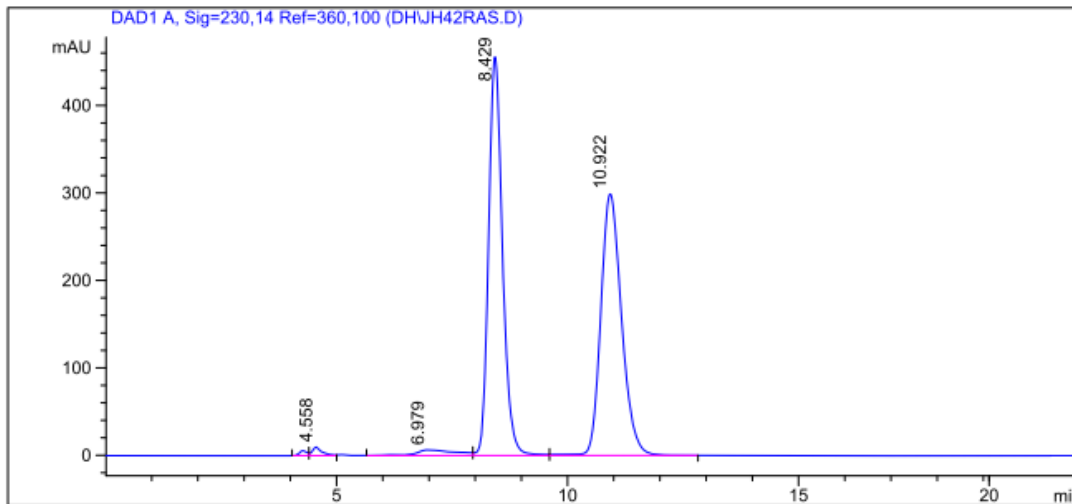

| #     | Ret. Time (min) | Width | Height (mAU) | Area (mAU*s) | Area % |
|-------|-----------------|-------|--------------|--------------|--------|
| 1     | 4.27            | 0.18  | 5.66         | 65.50        | 0.34   |
| 2     | 4.56            | 0.21  | 9.94         | 147.07       | 0.76   |
| 3     | 6.98            | 0.89  | 6.52         | 404.56       | 2.08   |
| 4     | 8.43            | 0.32  | 456.00       | 9517.98      | 48.90  |
| 5     | 10.92           | 0.48  | 299.16       | 9327.79      | 47.93  |
| Total |                 |       |              | 19462.91     | 100.00 |



Sample Name: DH 339  
 Data file: D:\ERNIE\DH\339AS.D  
 Sample Info: Laufmittel: n-Heptan/EtOH 9:1;  
 Die Probe ist in DCM/LM gelöst

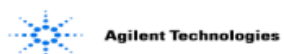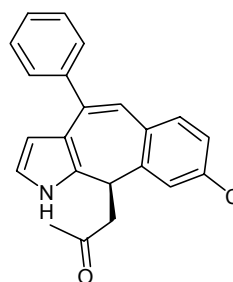

17b

Säule: DAICELAS.M  
 Säuleninfo: Chiralpak AS (250 x 4.6)mm 10µ

Operator: Analytik Labor AKEN

Injektion Time: 10:39:13  
 Injektion Date: 23.07.2013

| Instrument Conditions: | At Start | At Stop |
|------------------------|----------|---------|
| Temperature in°C:      | 31.1     | 31.4    |
| Pressure in bar:       | 21.8     | 21.6    |
| Flow in ml/min:        | 0.7      | 0.7     |

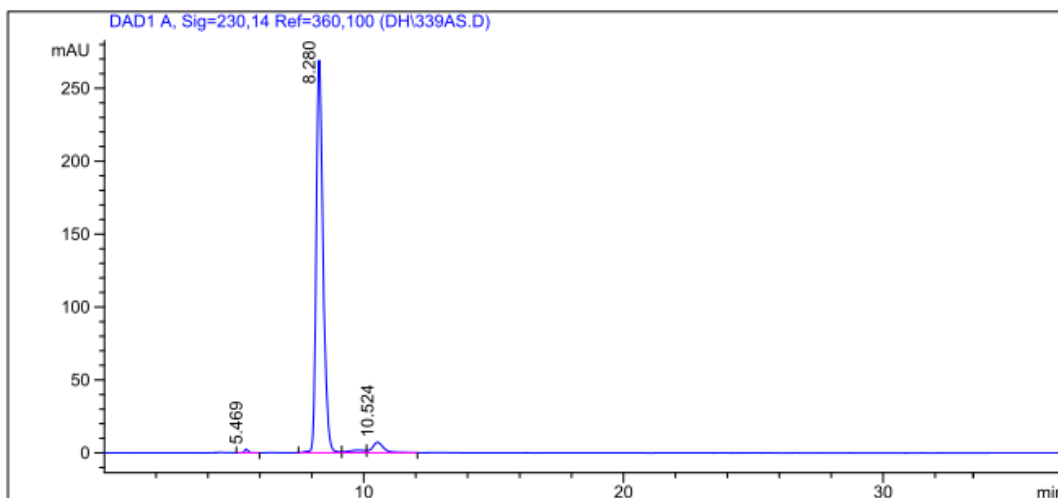

| #     | Ret. Time (min) | Width | Height (mAU) | Area (mAU*s) | Area % |
|-------|-----------------|-------|--------------|--------------|--------|
| 1     | 5.47            | 0.16  | 2.43         | 25.21        | 0.48   |
| 2     | 8.28            | 0.28  | 269.29       | 4895.85      | 93.73  |
| 3     | 9.79            | 0.55  | 1.76         | 78.60        | 1.50   |
| 4     | 10.52           | 0.45  | 7.27         | 223.61       | 4.28   |
| Total |                 |       |              | 5223.27      | 100.00 |

Sample Name: DH JH 43 rac  
 Data file: D:\ERNIE\DH\JH43R1AS.D  
 Sample Info: Laufmittel: n-Heptan/EtOH 9:1;  
 Die Probe ist in DCM/LM gelöst

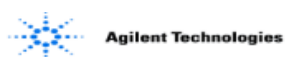

Säule: DAICELAS.M  
 Säuleninfo: Chiralpak AS (250 x 4.6)mm 10µ

Operator: Analytik Labor AKEN

Injektion Time: 08:50:44  
 Injektion Date: 05.07.2013

| Instrument Conditions: | At Start | At Stop |
|------------------------|----------|---------|
| Temperature in °C:     | 30.0     | 30.0    |
| Pressure in bar:       | 22.4     | 21.6    |
| Flow in ml/min:        | 0.7      | 0.7     |

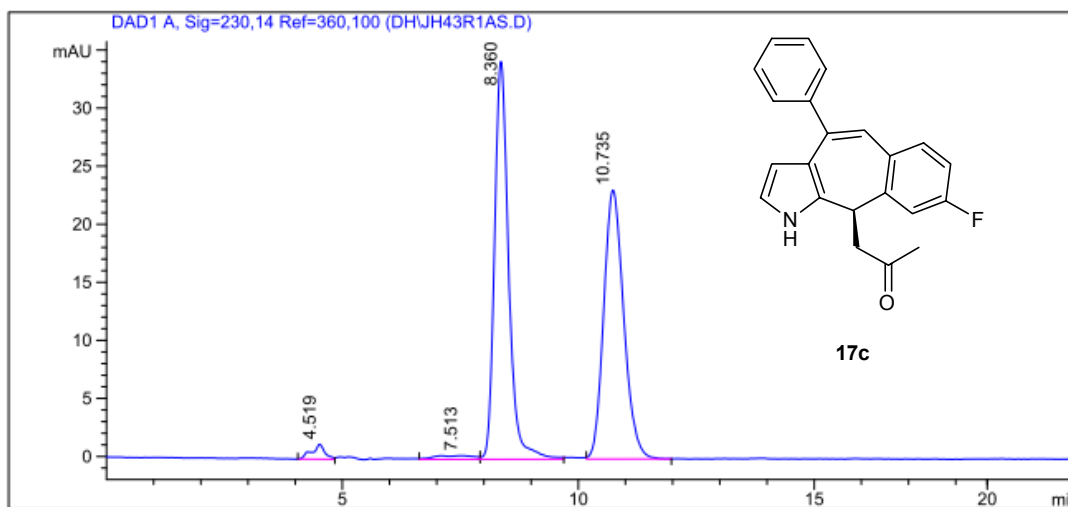

| #     | Ret. Time (min) | Width | Height (mAU) | Area (mAU*s) | Area % |
|-------|-----------------|-------|--------------|--------------|--------|
| 1     | 4.52            | 0.26  | 1.28         | 24.63        | 1.71   |
| 2     | 7.51            | 0.69  | 0.33         | 18.89        | 1.31   |
| 3     | 8.36            | 0.31  | 34.25        | 710.64       | 49.45  |
| 4     | 10.74           | 0.46  | 23.15        | 682.94       | 47.52  |
| Total |                 |       |              | 1437.10      | 100.00 |

Sample Name: DH 340  
 Data file: D:\ERNIE\DH\340AS.D  
 Sample Info: Laufmittel: n-Heptan/EtOH 9:1;  
 Die Probe ist in DCM/LM gelöst

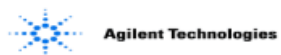

Säule: DAICELAS.M  
 Säuleninfo: Chiralpak AS (250 x 4.6)mm 10µ

Operator: Analytik Labor AKEN

Injektion Time: 09:37:47  
 Injektion Date: 23.07.2013

| Instrument Conditions: | At Start | At Stop |
|------------------------|----------|---------|
| Temperature in °C:     | 30.5     | 30.7    |
| Pressure in bar:       | 22.2     | 21.8    |
| Flow in ml/min:        | 0.7      | 0.7     |

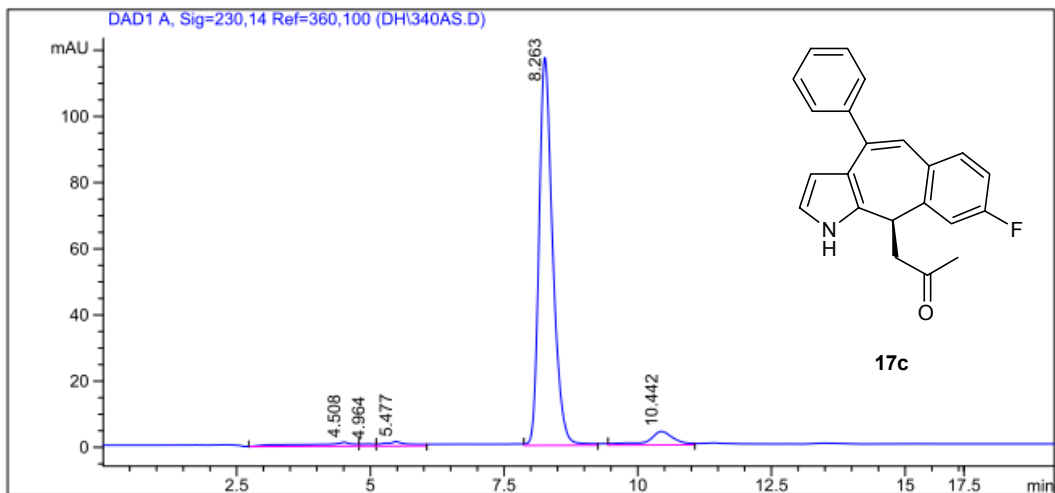

| #     | Ret. Time (min) | Width | Height (mAU) | Area (mAU*s) | Area % |
|-------|-----------------|-------|--------------|--------------|--------|
| 1     | 4.51            | 0.73  | 1.22         | 73.32        | 3.12   |
| 2     | 4.96            | 0.24  | 0.68         | 12.35        | 0.53   |
| 3     | 5.48            | 0.40  | 1.37         | 43.28        | 1.84   |
| 4     | 8.26            | 0.27  | 117.36       | 2081.04      | 88.64  |
| 5     | 10.44           | 0.47  | 4.11         | 137.83       | 5.87   |
| Total |                 |       |              | 2347.82      | 100.00 |

Sample Name: DH 38 rac  
 Data file: D:\ERNIE\DH\38RAS.D  
 Sample Info: Laufmittel: n-Heptan/EtOH 9:1;  
 Die Probe ist in DCM/LM gelöst

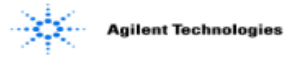

Säule: DAICELAS.M  
 Säuleninfo: Chiralpak AS (250 x 4.6)mm 10µ  
 Operator: Analytik Labor AKEN

Injektion Time: 08:58:45  
 Injektion Date: 03.07.2013

| Instrument Conditions: | At Start | At Stop |
|------------------------|----------|---------|
| Temperature in °C:     | 30.0     | 30.0    |
| Pressure in bar:       | 31.4     | 32.0    |
| Flow in ml/min:        | 1.0      | 1.0     |

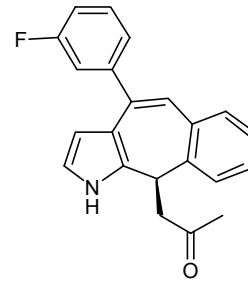

17d

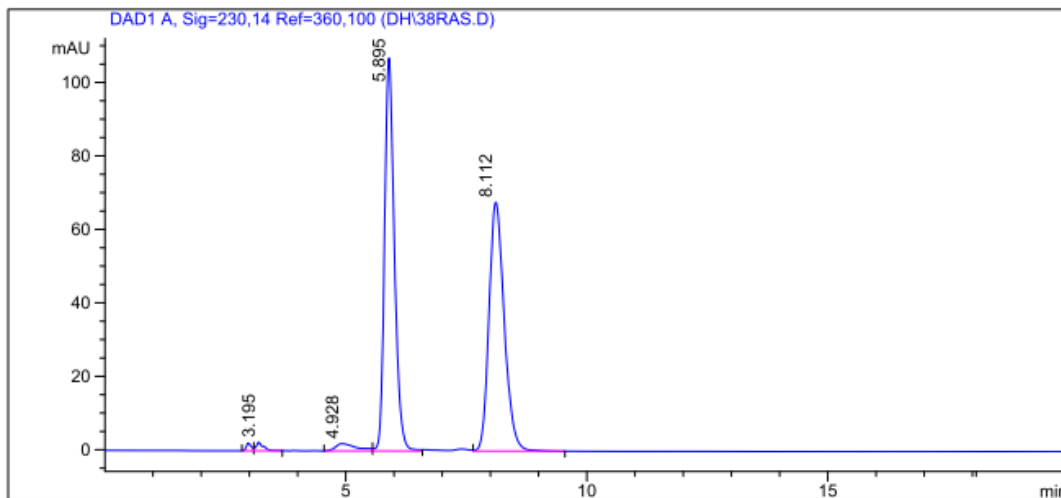

| #     | Ret. Time (min) | Width | Height (mAU) | Area (mAU*s) | Area % |
|-------|-----------------|-------|--------------|--------------|--------|
| 1     | 2.98            | 0.11  | 2.09         | 15.15        | 0.49   |
| 2     | 3.19            | 0.15  | 2.35         | 24.82        | 0.80   |
| 3     | 4.93            | 0.41  | 2.01         | 59.94        | 1.94   |
| 4     | 5.89            | 0.22  | 106.95       | 1510.00      | 48.81  |
| 5     | 8.11            | 0.34  | 67.77        | 1483.91      | 47.96  |
| Total |                 |       |              | 3093.83      | 100.00 |

Sample Name: DH 341  
 Data file: D:\ERNIE\DH\341AS.D  
 Sample Info: Laufmittel: n-Heptan/EtOH 9:1;  
 Die Probe ist in DCM/LM gelöst

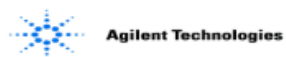

Säule: DAICELAS.M  
 Säuleninfo: Chiralpak AS (250 x 4.6)mm 10µ

Operator: Analytik Labor AKEN

Injektion Time: 08:22:56  
 Injektion Date: 29.07.2013

Instrument Conditions: At Start At Stop

Temperature in°C: 30.0 30.0  
 Pressure in bar: 31.4 30.6  
 Flow in ml/min: 1.0 1.0

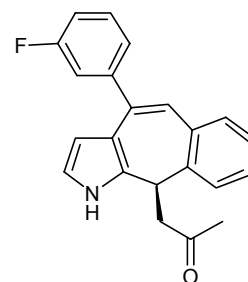

17d

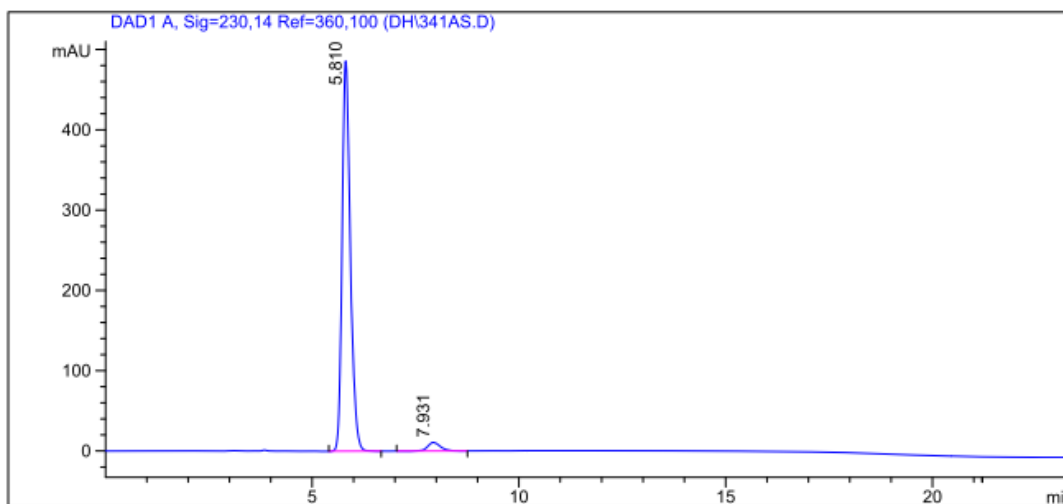

| #     | Ret. Time (min) | Width | Height (mAU) | Area (mAU*s) | Area % |
|-------|-----------------|-------|--------------|--------------|--------|
| 1     | 5.81            | 0.21  | 486.34       | 6689.80      | 96.54  |
| 2     | 7.93            | 0.33  | 10.86        | 239.89       | 3.46   |
| Total |                 |       |              | 6929.69      | 100.00 |

**Sample name:** DH JH 36 rac  
**Data file:** C:\SNOOPY\DH\DH JH 36 RAC IA.D  
**Description:** Laufmittel: n-Heptan/IP 9:1; Die Probe ist in EtOH/LM gelöst.  
**Injection date:** 6/27/2013 10:32:25 AM  
**Acq. Analysis method:** CHIRALPAKIARNP.M  
**Column:** Chiralpak IA (250 x 4,6) mm, 5µ, SN: IA00CE-RC036

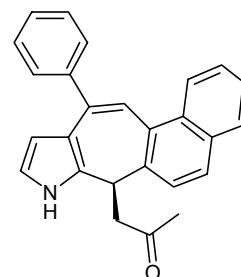

**Pressure at start:** 47 bar      **Start flow:** 0.700 ml/min      **Column oven:** 29.98 °C **17e**

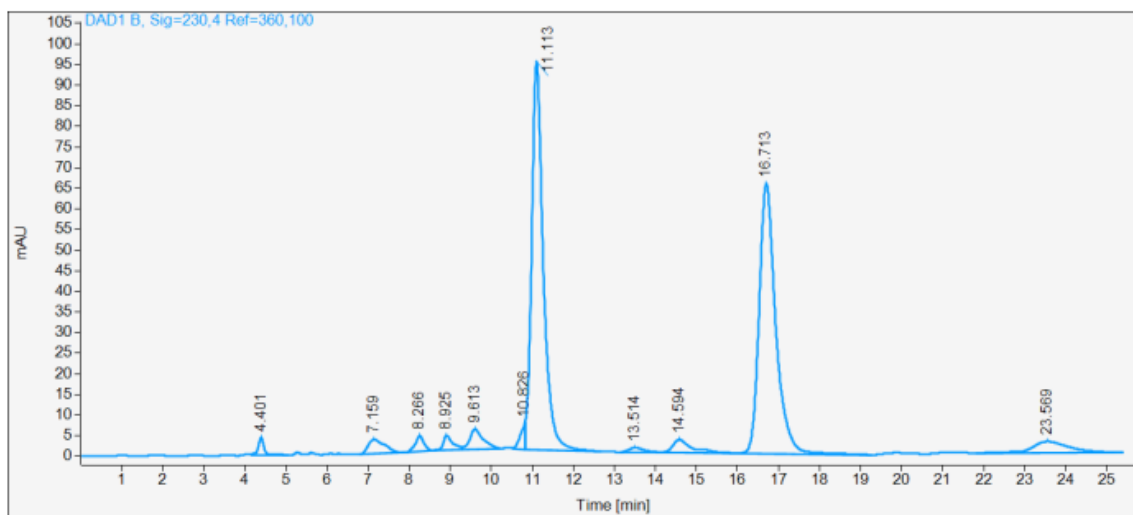

| Name     | DH JH 36 rac |        | Area%   | Area  | Height | Width [min] |
|----------|--------------|--------|---------|-------|--------|-------------|
| RT [min] | Type         |        |         |       |        |             |
| 4.40     | VB           | 1.00   | 44.02   | 4.29  | 0.15   |             |
| 7.16     | BB           | 2.23   | 98.53   | 3.50  | 0.40   |             |
| 8.27     | BB           | 1.28   | 56.48   | 3.83  | 0.21   |             |
| 8.92     | BV           | 1.34   | 59.21   | 3.61  | 0.23   |             |
| 9.61     | VB           | 2.52   | 111.07  | 4.91  | 0.32   |             |
| 10.83    | MF           | 1.10   | 48.55   | 6.16  | 0.13   |             |
| 11.11    | FM           | 41.89  | 1848.95 | 94.19 | 0.33   |             |
| 13.51    | BV           | 0.67   | 29.44   | 1.11  | 0.39   |             |
| 14.59    | VB           | 2.29   | 101.21  | 3.14  | 0.46   |             |
| 16.71    | BB           | 41.59  | 1835.43 | 65.42 | 0.42   |             |
| 23.57    | BBA          | 4.09   | 180.53  | 2.76  | 0.95   |             |
|          | Sum          | 100.00 | 4413.42 |       |        |             |

**Sample name:** DH 342  
**Data file:** C:\SNOOPY\DH\DH 342 IA.D  
**Description:** Laufmittel: n-Heptan/IP 9:1; Die Probe ist in EtOH/LM gelöst.  
**Injection date:** 7/31/2013 8:28:34 AM  
**Acq. Analysis method:** CHIRALPAKIARNP.M  
**Column:** Chiralpak IA (250 x 4,6) mm, 5 $\mu$ , SN: IA00CE-RC036

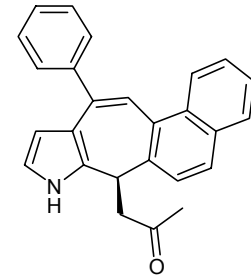

17e

**Pressure at start:** 34 bar      **Start flow:** 0.700 ml/min      **Column oven:** 30 °C

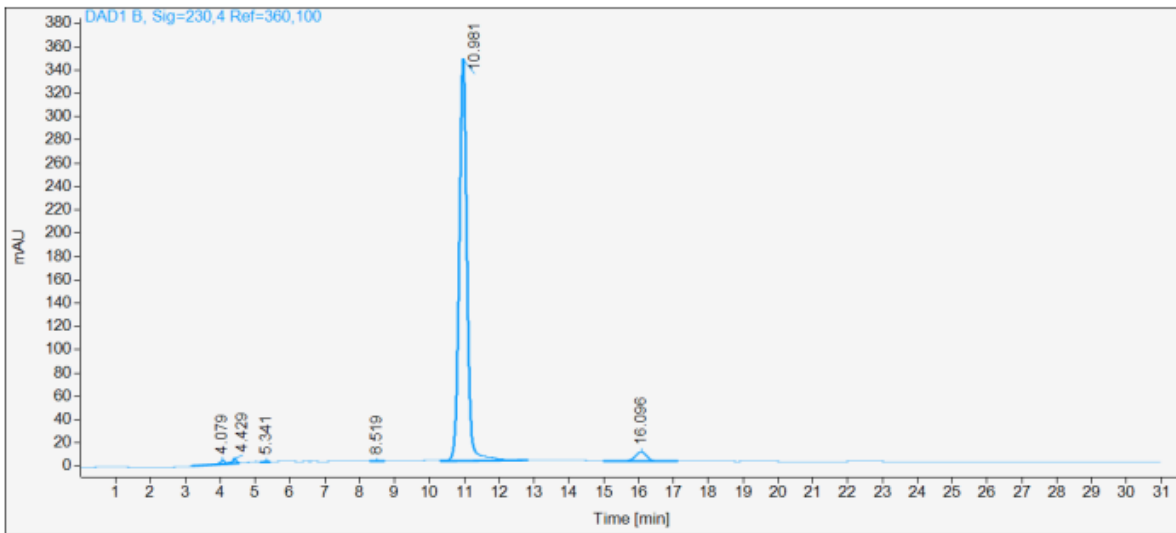

| Name | DH 342   |      |        |         |        |             |
|------|----------|------|--------|---------|--------|-------------|
|      | RT [min] | Type | Area%  | Area    | Height | Width [min] |
|      | 4.08     | BV   | 0.73   | 41.01   | 3.72   | 0.15        |
|      | 4.43     | VB   | 0.76   | 43.07   | 4.58   | 0.13        |
|      | 5.34     | VB   | 0.20   | 11.31   | 1.32   | 0.12        |
|      | 8.52     | VV   | 0.21   | 11.67   | 0.58   | 0.28        |
|      | 10.98    | VB   | 94.72  | 5340.94 | 344.92 | 0.23        |
|      | 16.10    | BB   | 3.38   | 190.43  | 8.10   | 0.35        |
|      | Sum      |      | 100.00 | 5638.42 |        |             |

Sample Name: DH JH 35 rac  
 Data file: D:\GONZO\DH\JH35ROD.D  
 Sample Info: Laufmittel: n-Heptan/EtOH 9:1;  
 Die Probe ist in DCM/LM gelöst.

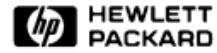

Säule: DAICELOD.M  
 Säuleninfo: Chiralcel OD (250x4,6)mm  
 Operator: Analytik Labor AKEN

Injektion Time: 08:26:36  
 Injektion Date: 27.06.2013

|                        |          |         |
|------------------------|----------|---------|
| Instrument Conditions: | At Start | At Stop |
| Temperature in °C:     | 30.0 °C  | 30.0 °C |
| Pressure in bar:       | 18.1     | 18.2    |
| Flow in ml/min:        | 0.70     | 0.70    |

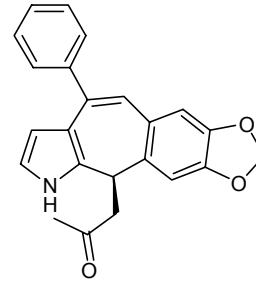

17f

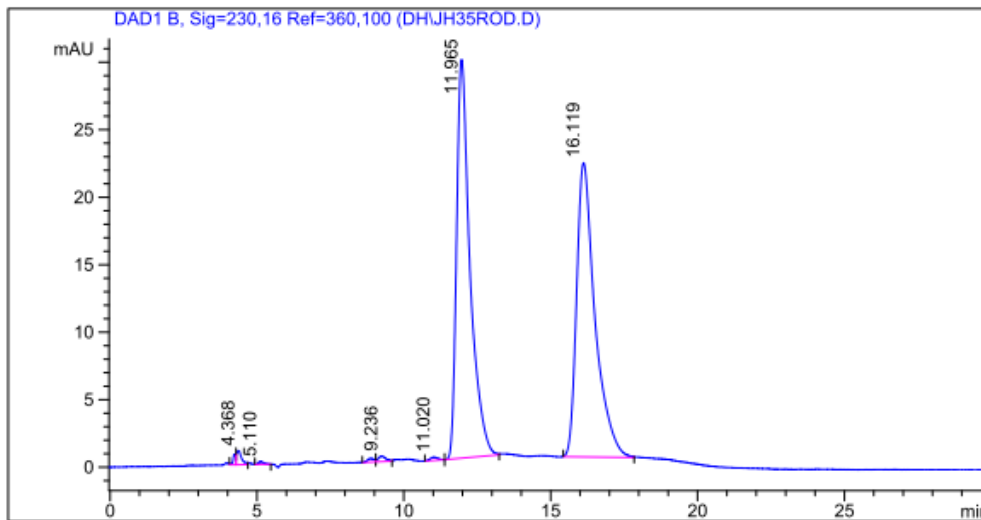

| #     | Ret. Time (min) | Width | Height (mAU) | Area (mAU*s) | Area % |
|-------|-----------------|-------|--------------|--------------|--------|
| 1     | 4.22            | 0.09  | 0.75         | 5.17         | 0.27   |
| 2     | 4.37            | 0.18  | 1.04         | 12.66        | 0.66   |
| 3     | 5.11            | 0.20  | 0.21         | 2.55         | 0.13   |
| 4     | 8.88            | 0.23  | 0.28         | 4.25         | 0.22   |
| 5     | 9.24            | 0.27  | 0.41         | 7.53         | 0.39   |
| 6     | 11.02           | 0.24  | 0.24         | 4.35         | 0.23   |
| 7     | 11.97           | 0.47  | 29.54        | 938.33       | 48.88  |
| 8     | 16.12           | 0.64  | 21.79        | 944.74       | 49.22  |
| Total |                 |       |              | 1919.57      | 100.00 |



Sample Name: DH 344-2  
 Data file: D:\GONZO\DH\344-2OD.D  
 Sample Info: Laufmittel: n-Heptan/EtOH 9:1;  
 Die Probe ist in LM/EtOH gelöst.

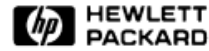

Säule: DAICELOD.M  
 Säuleninfo: Chiralcel OD (250x4,6)mm  
 Operator: Analytik Labor AKEN

Injektion Time: 13:13:55  
 Injektion Date: 18.09.2013

Instrument Conditions: At Start At Stop  
 Temperature in °C: 30.0 °C 30.0 °C  
 Pressure in bar: 19.1 19.4  
 Flow in ml/min: 0.70 0.70

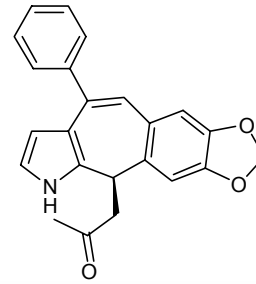

->

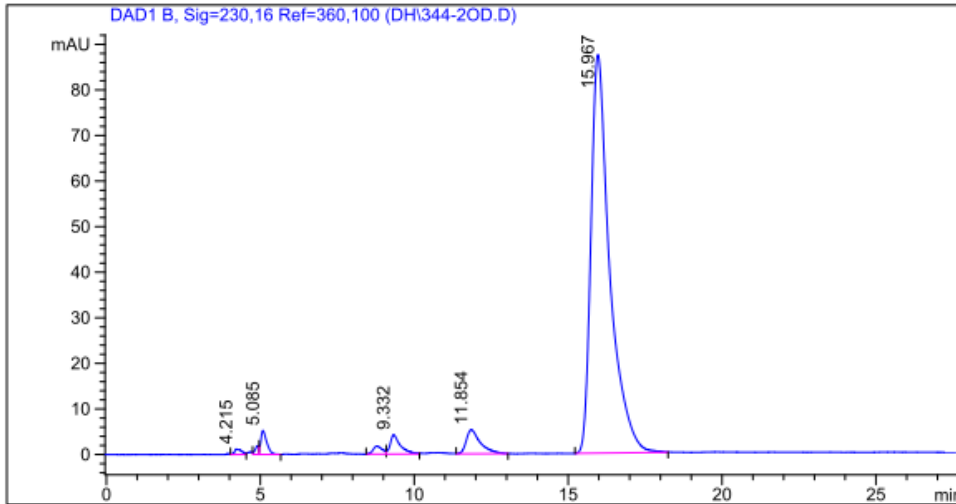

17f

| #     | Ret. Time (min) | Width | Height (mAU) | Area (mAU*s) | Area % |
|-------|-----------------|-------|--------------|--------------|--------|
| 1     | 4.22            | 0.21  | 1.23         | 20.08        | 0.49   |
| 2     | 4.92            | 0.13  | 1.96         | 16.58        | 0.40   |
| 3     | 5.08            | 0.20  | 5.29         | 71.34        | 1.73   |
| 4     | 8.79            | 0.31  | 1.75         | 35.93        | 0.87   |
| 5     | 9.33            | 0.33  | 4.22         | 97.54        | 2.37   |
| 6     | 11.85           | 0.47  | 5.28         | 168.78       | 4.10   |
| 7     | 15.97           | 0.62  | 87.43        | 3702.80      | 90.03  |
| Total |                 |       |              | 4113.04      | 100.00 |

Sample Name: DH JH 31 rac  
 Data file: D:\GONZO\DH\JH31ROD.D  
 Sample Info: Laufmittel: n-Heptan/EtOH 9:1;  
 Die Probe ist in DCM/LM gelöst.

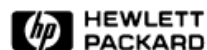

Säule: DAICELOD.M  
 Säuleninfo: Chiralcel OD (250x4,6)mm  
 Operator: Analytik Labor AKEN

Injektion Time: 10:26:34  
 Injektion Date: 20.06.2013

|                        |          |         |
|------------------------|----------|---------|
| Instrument Conditions: | At Start | At Stop |
| Temperature in °C:     | 30.0 °C  | 30.0 °C |
| Pressure in bar:       | 27.0     | 27.3    |
| Flow in ml/min:        | 1.00     | 1.00    |

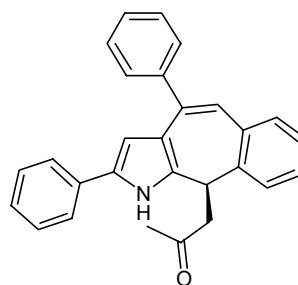

->

17g

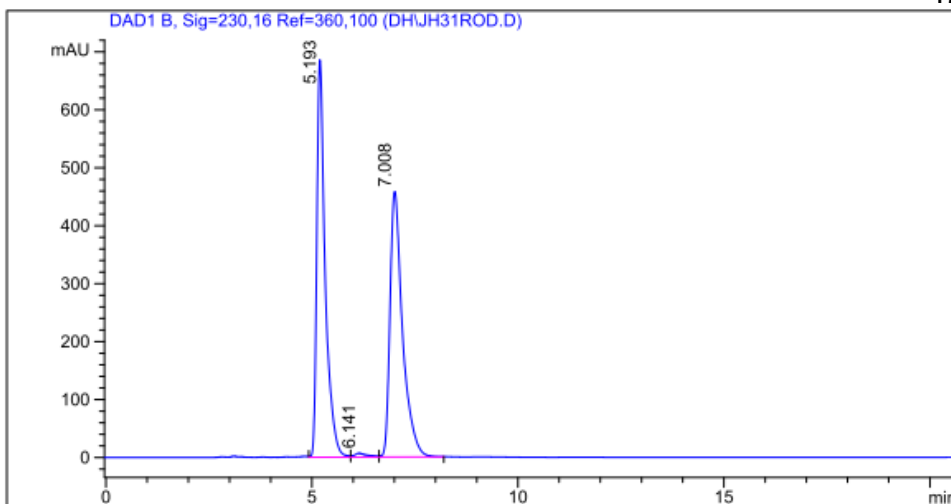

| #     | Ret. Time (min) | Width | Height (mAU) | Area (mAU*s) | Area % |
|-------|-----------------|-------|--------------|--------------|--------|
| 1     | 5.19            | 0.21  | 685.74       | 9720.87      | 49.74  |
| 2     | 6.14            | 0.31  | 6.78         | 149.62       | 0.77   |
| 3     | 7.01            | 0.31  | 457.64       | 9674.29      | 49.50  |
| Total |                 |       |              | 19544.78     | 100.00 |

Sample Name: DH 345  
 Data file: D:\GONZO\DH\345OD.D  
 Sample Info: Laufmittel: n-Heptan/EtOH 9:1;  
 Die Probe ist in DCM/LM gelöst.

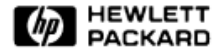

Säule: DAICELOD.M  
 Säuleninfo: Chiralcel OD (250x4,6)mm  
 Operator: Analytik Labor AKEN

Injektion Time: 09:41:26  
 Injektion Date: 30.07.2013

|                        |          |         |
|------------------------|----------|---------|
| Instrument Conditions: | At Start | At Stop |
| Temperature in °C:     | 30.0 °C  | 30.0 °C |
| Pressure in bar:       | 26.7     | 27.3    |
| Flow in ml/min:        | 1.00     | 1.00    |

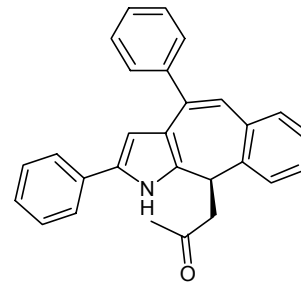

17g

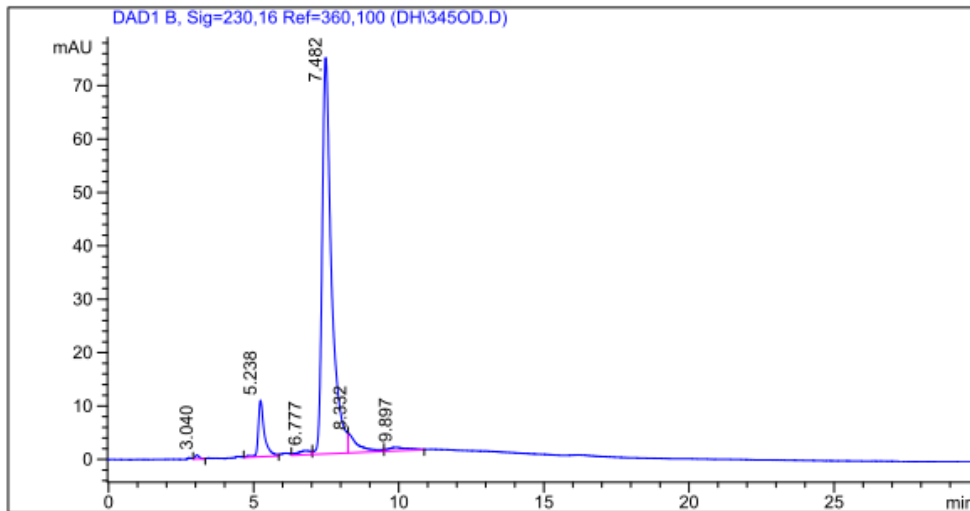

| #     | Ret. Time (min) | Width | Height (mAU) | Area (mAU*s) | Area % |
|-------|-----------------|-------|--------------|--------------|--------|
| 1     | 3.04            | 0.14  | 0.77         | 7.43         | 0.38   |
| 2     | 5.24            | 0.21  | 10.55        | 153.15       | 7.74   |
| 3     | 6.78            | 0.41  | 0.79         | 24.48        | 1.24   |
| 4     | 7.48            | 0.33  | 74.23        | 1673.50      | 84.59  |
| 5     | 8.33            | 0.35  | 3.31         | 87.01        | 4.40   |
| 6     | 9.90            | 0.64  | 0.69         | 32.83        | 1.66   |
| Total |                 |       |              | 1978.41      | 100.00 |

Sample Name: DH 352 rac  
 Data file: D:\GONZO\DH\352R2AD.D  
 Sample Info: Laufmittel: n-Heptan/IP 7:3;  
 Die Probe ist in DCM/LM gelöst.

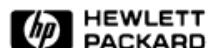

Säule: DAICELAD.M  
 Säuleninfo: Chiralpak AD (250x4,6)mm  
 Operator: Analytik Labor AKEN

Injektion Time: 13:14:19  
 Injektion Date: 02.08.2013

|                        |          |         |
|------------------------|----------|---------|
| Instrument Conditions: | At Start | At Stop |
| Temperature in °C:     | 30.0 °C  | 30.0 °C |
| Pressure in bar:       | 29.9     | 30.2    |
| Flow in ml/min:        | 1.00     | 1.00    |

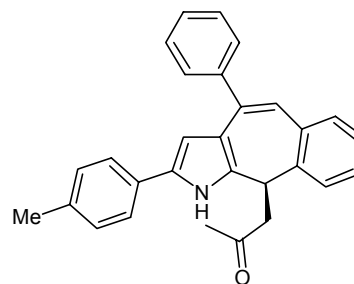

17h

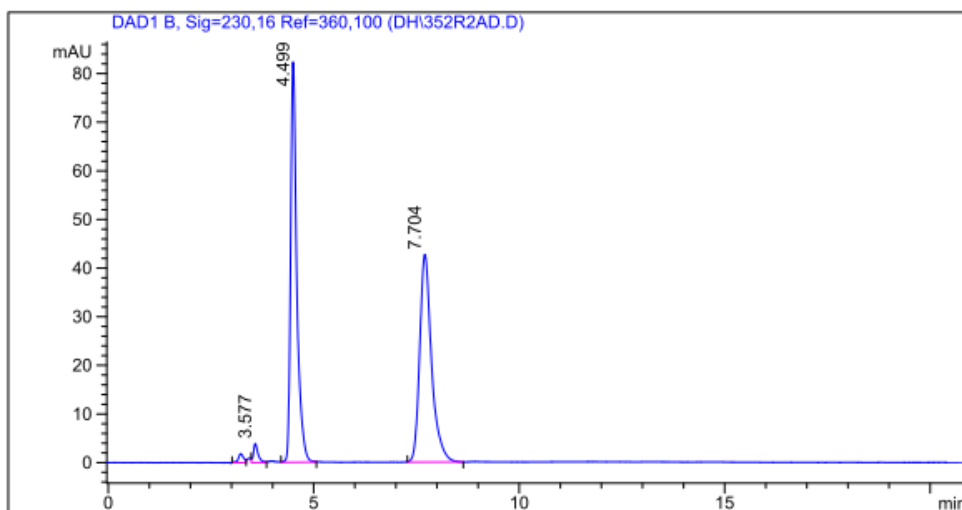

| #     | Ret. Time (min) | Width | Height (mAU) | Area (mAU*s) | Area % |
|-------|-----------------|-------|--------------|--------------|--------|
| 1     | 3.22            | 0.13  | 1.83         | 16.34        | 0.93   |
| 2     | 3.58            | 0.12  | 3.92         | 30.66        | 1.74   |
| 3     | 4.50            | 0.15  | 82.26        | 858.73       | 48.72  |
| 4     | 7.70            | 0.30  | 42.67        | 856.91       | 48.62  |
| Total |                 |       |              | 1762.65      | 100.00 |

Sample Name: DH 346  
 Data file: D:\GONZO\DH\346AD.D  
 Sample Info: Laufmittel: n-Heptan/IP 7:3;  
 Die Probe ist in LM/DCM gelöst

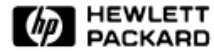

Säule: DAICELAD.M  
 Säuleninfo: Chiralpak AD (250x4,6)mm  
 Operator: Analytik Labor AKEN

Injektion Time: 09:56:29  
 Injektion Date: 06.08.2013

|                        |          |         |
|------------------------|----------|---------|
| Instrument Conditions: | At Start | At Stop |
| Temperature in °C:     | 30.0 °C  | 30.0 °C |
| Pressure in bar:       | 30.0     | 30.7    |
| Flow in ml/min:        | 1.00     | 1.00    |

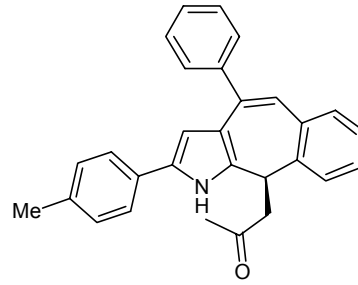

17h

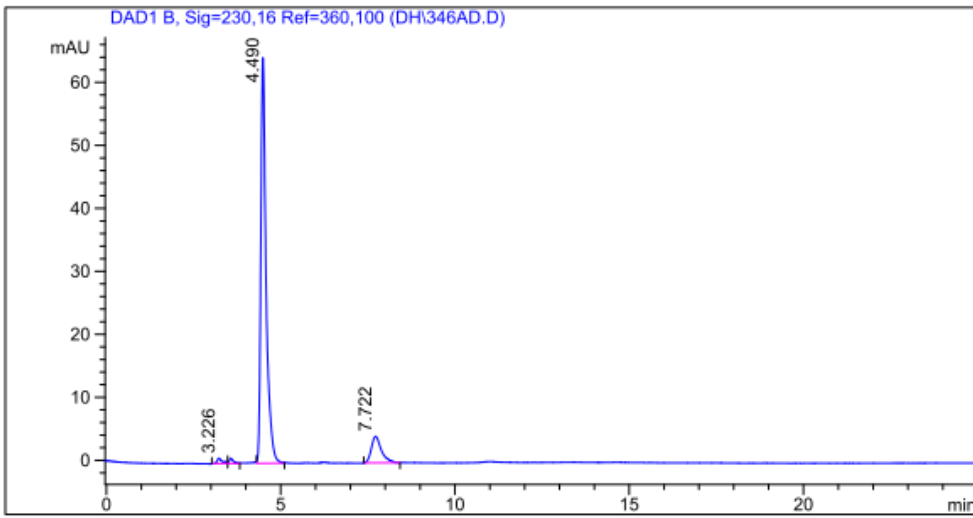

| #     | Ret. Time (min) | Width | Height (mAU) | Area (mAU*s) | Area % |
|-------|-----------------|-------|--------------|--------------|--------|
| 1     | 3.23            | 0.16  | 0.85         | 9.44         | 1.22   |
| 2     | 3.57            | 0.12  | 0.84         | 7.13         | 0.92   |
| 3     | 4.49            | 0.15  | 64.25        | 674.07       | 86.94  |
| 4     | 7.72            | 0.30  | 4.20         | 84.70        | 10.92  |
| Total |                 |       |              | 775.34       | 100.00 |

Sample Name: DH 353 rac  
 Data file: D:\GONZO\DH\353R2AD.D  
 Sample Info: Laufmittel: n-Heptan/IP 7:3;  
 Die Probe ist in DCM/LM gelöst.

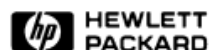

Säule: DAICELAD.M  
 Säuleninfo: Chiralpak AD (250x4,6)mm  
 Operator: Analytik Labor AKEN

Injektion Time: 12:24:53  
 Injektion Date: 02.08.2013

Instrument Conditions: At Start  
 Temperature in °C: 30.0 °C  
 Pressure in bar: 29.8  
 Flow in ml/min: 1.00

At Stop  
 Temperature in °C: 30.0 °C  
 Pressure in bar: 30.2  
 Flow in ml/min: 1.00

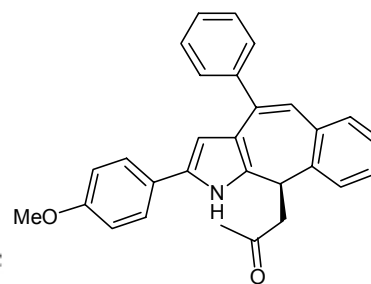

171

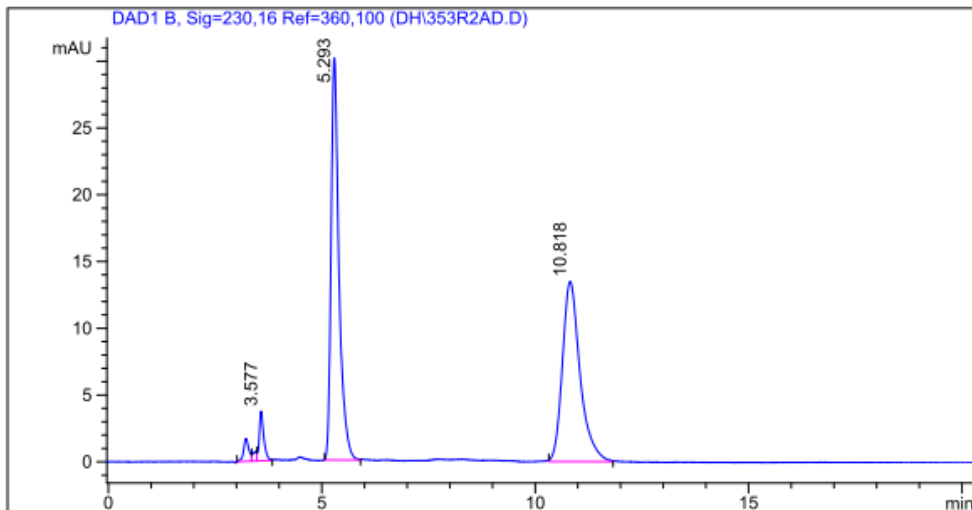

| #     | Ret. Time (min) | Width | Height (mAU) | Area (mAU*s) | Area % |
|-------|-----------------|-------|--------------|--------------|--------|
| 1     | 3.22            | 0.12  | 1.71         | 14.76        | 1.80   |
| 2     | 3.43            | 0.09  | 0.71         | 4.36         | 0.53   |
| 3     | 3.58            | 0.11  | 3.72         | 27.39        | 3.34   |
| 4     | 5.29            | 0.19  | 30.07        | 386.64       | 47.09  |
| 5     | 10.82           | 0.44  | 13.48        | 387.88       | 47.24  |
| Total |                 |       |              | 821.03       | 100.00 |

Sample Name: DH 347-2  
 Data file: D:\GONZO\DH\347-2AD.D  
 Sample Info: Laufmittel: n-Heptan/IP 7:3;  
 Die Probe ist in LM/DCM gelöst

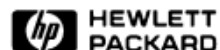

Säule: DAICELAD.M  
 Säuleninfo: Chiralpak AD (250x4,6)mm  
 Operator: Analytik Labor AKEN

Injektion Time: 11:50:25  
 Injektion Date: 11.09.2013

|                        |          |         |
|------------------------|----------|---------|
| Instrument Conditions: | At Start | At Stop |
| Temperature in °C:     | 30.0 °C  | 30.0 °C |
| Pressure in bar:       | 32.4     | 33.2    |
| Flow in ml/min:        | 1.00     | 1.00    |

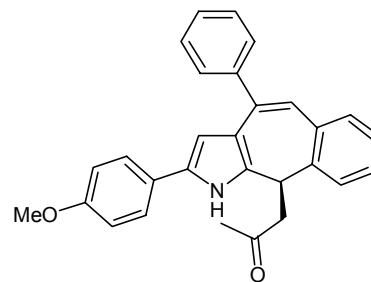

17i

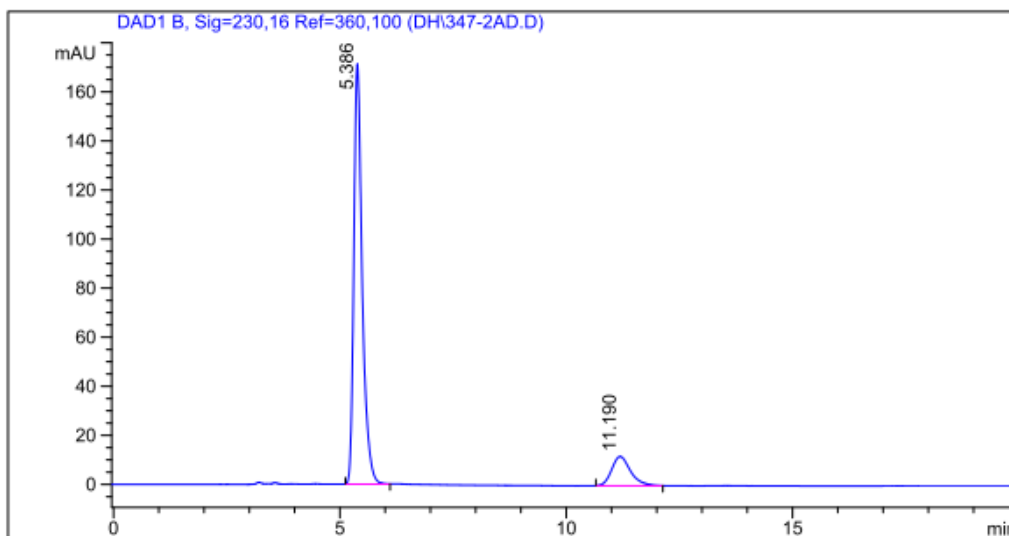

| #     | Ret. Time (min) | Width | Height (mAU) | Area (mAU*s) | Area % |
|-------|-----------------|-------|--------------|--------------|--------|
| 1     | 5.39            | 0.19  | 171.06       | 2207.90      | 86.38  |
| 2     | 11.19           | 0.44  | 11.97        | 348.06       | 13.62  |
| Total |                 |       |              | 2555.96      | 100.00 |

Sample Name: DH 354 rac  
 Data file: D:\GONZO\DH\354R2AD.D  
 Sample Info: Laufmittel: n-Heptan/IP 7:3;  
 Die Probe ist in DCM/LM gelöst.

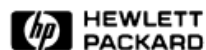

Säule: DAICELAD.M  
 Säuleninfo: Chiralpak AD (250x4,6)mm  
 Operator: Analytik Labor AKEN

Injektion Time: 12:48:54  
 Injektion Date: 02.08.2013

|                        |          |         |
|------------------------|----------|---------|
| Instrument Conditions: | At Start | At Stop |
| Temperature in °C:     | 30.0 °C  | 30.0 °C |
| Pressure in bar:       | 29.7     | 30.3    |
| Flow in ml/min:        | 1.00     | 1.00    |

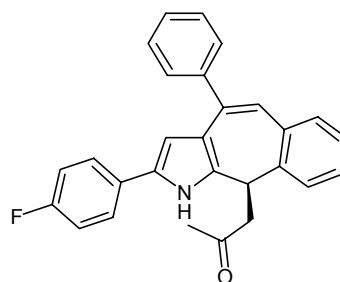

->

17j

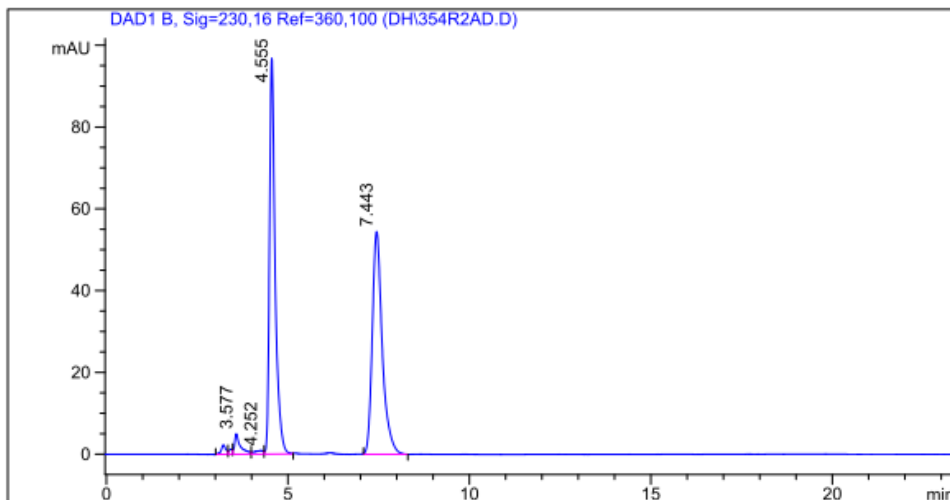

| #     | Ret. Time (min) | Width | Height (mAU) | Area (mAU*s) | Area % |
|-------|-----------------|-------|--------------|--------------|--------|
| 1     | 3.22            | 0.13  | 2.29         | 20.31        | 0.93   |
| 2     | 3.44            | 0.10  | 1.27         | 8.29         | 0.38   |
| 3     | 3.58            | 0.15  | 4.99         | 55.86        | 2.55   |
| 4     | 4.25            | 0.23  | 0.88         | 14.64        | 0.67   |
| 5     | 4.55            | 0.16  | 96.55        | 1050.32      | 47.97  |
| 6     | 7.44            | 0.29  | 54.45        | 1040.16      | 47.51  |
| Total |                 |       |              | 2189.59      | 100.00 |



Sample Name: DH 348-2  
 Data file: D:\GONZO\DH\348-2AD.D  
 Sample Info: Laufmittel: n-Heptan/IP 7:3;  
 Die Probe ist in LM/DCM gelöst

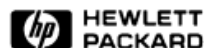

Säule: DAICELAD.M  
 Säuleninfo: Chiralpak AD (250x4,6)mm  
 Operator: Analytik Labor AKEN

Injektion Time: 12:11:37  
 Injektion Date: 11.09.2013

|                        |          |         |
|------------------------|----------|---------|
| Instrument Conditions: | At Start | At Stop |
| Temperature in °C:     | 30.0 °C  | 30.0 °C |
| Pressure in bar:       | 32.5     | 33.2    |
| Flow in ml/min:        | 1.00     | 1.00    |

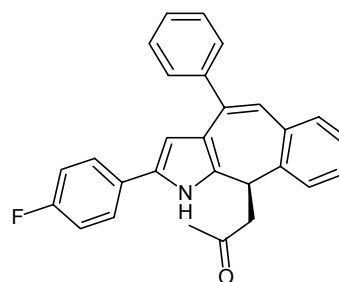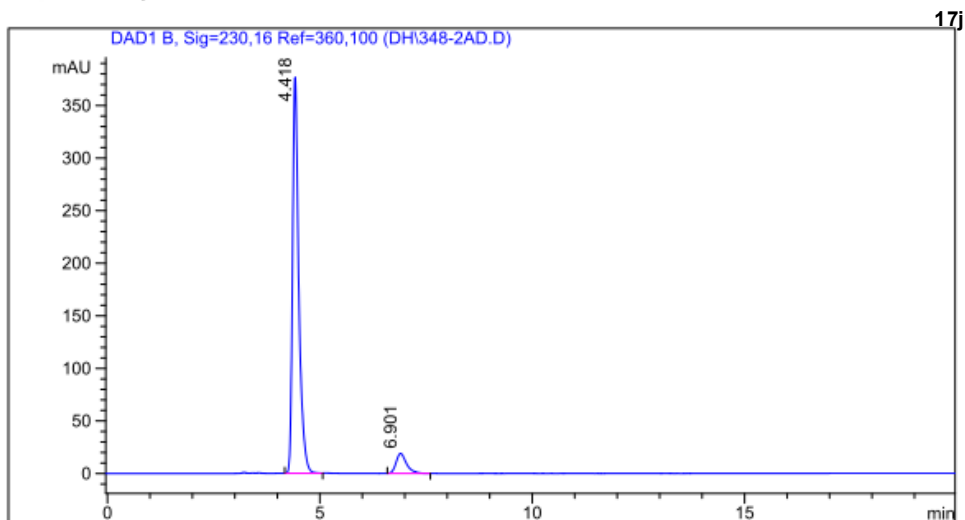

| #     | Ret. Time (min) | Width | Height (mAU) | Area (mAU*s) | Area % |
|-------|-----------------|-------|--------------|--------------|--------|
| 1     | 4.42            | 0.15  | 376.25       | 3836.22      | 92.19  |
| 2     | 6.90            | 0.26  | 18.99        | 325.16       | 7.81   |
| Total |                 |       |              | 4161.38      | 100.00 |

**Sample name:** DH 355 rac  
**Data file:** C:\SNOOPY\DH\DH 355 RAC IA.D  
**Description:** Laufmittel: n-Heptan/IP 7:3; Die Probe ist in EtOH/LM gelöst.  
**Injection date:** 8/8/2013 8:55:00 AM  
**Acq. Analysis method:** CHIRALPAKIARNP.M  
**Column:** Chiralpak IA (250 x 4,6) mm, 5µ, SN: IA00CE-RC036

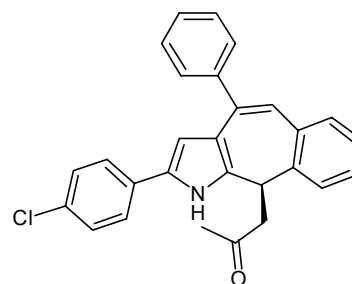

**Pressure at start:** 43 bar      **Start flow:** 0.700 ml/min      **Column oven:** 30 °C      **17k**

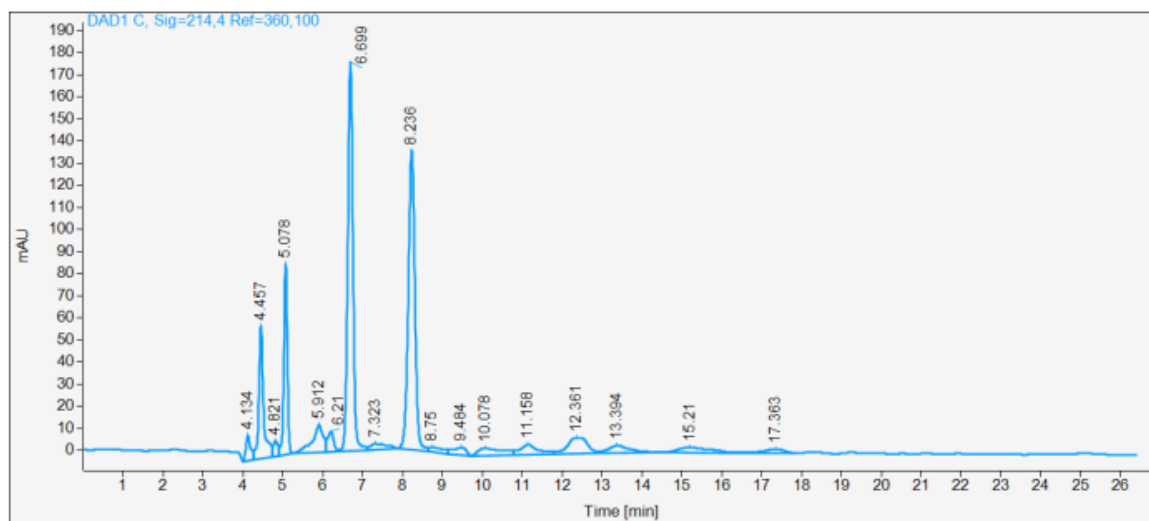

| Name       | RT [min] | Type | Area%  | Area    | Height | Width [min] |
|------------|----------|------|--------|---------|--------|-------------|
| DH 355 rac |          |      |        |         |        |             |
|            | 4.13     | BV   | 1.62   | 93.57   | 11.15  | 0.13        |
|            | 4.46     | VV   | 8.47   | 488.20  | 58.51  | 0.13        |
|            | 4.82     | VV   | 1.07   | 61.76   | 6.81   | 0.13        |
|            | 5.08     | VB   | 9.05   | 522.03  | 84.87  | 0.10        |
|            | 5.91     | BV   | 4.09   | 236.02  | 12.14  | 0.27        |
|            | 6.21     | VV   | 1.74   | 100.24  | 9.07   | 0.16        |
|            | 6.70     | VV   | 27.24  | 1570.89 | 174.41 | 0.15        |
|            | 7.32     | VB   | 1.29   | 74.32   | 2.51   | 0.39        |
|            | 8.24     | BV   | 27.08  | 1561.23 | 134.45 | 0.18        |
|            | 8.75     | VV   | 0.99   | 57.27   | 2.17   | 0.36        |
|            | 9.48     | VB   | 1.33   | 76.57   | 3.27   | 0.34        |
|            | 10.08    | BV   | 2.57   | 148.39  | 3.36   | 0.61        |
|            | 11.16    | VV   | 2.74   | 158.18  | 4.67   | 0.47        |
|            | 12.36    | VV   | 4.62   | 266.30  | 7.25   | 0.49        |
|            | 13.39    | VB   | 2.37   | 136.56  | 3.47   | 0.55        |
|            | 15.21    | BV   | 2.26   | 130.21  | 2.39   | 0.77        |
|            | 17.36    | VV   | 1.46   | 84.22   | 1.97   | 0.63        |
|            | Sum      |      | 100.00 | 5765.96 |        |             |

**Sample name:** DH 349-2  
**Data file:** C:\SNOOPY\DH\DH 349-2 IA.D  
**Description:** Laufmittel: n-Heptan/IP 7:3 Die Probe ist in DCM/EtOH/LM gelöst.

**Injection date:** 9/13/2013 10:09:05 AM  
**Acq. Analysis method:** CHIRALPAKIARNP.M

**Column:** Chiralpak IA (250 x 4,6) mm, 5µ, SN: IA00CE-RC036

**Pressure at start:** 44 bar      **Start flow:** 0.700 ml/min      **Column oven:** 29.97 °C

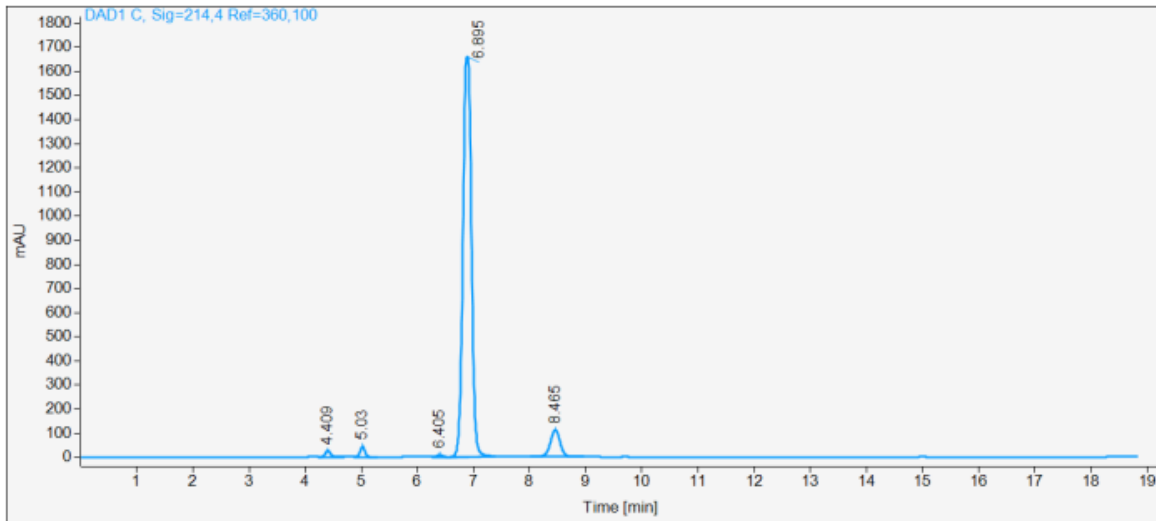

| Name | RT [min] | Type | Area%  | Area     | Height  | Width [min] |
|------|----------|------|--------|----------|---------|-------------|
|      | 4.41     | VV   | 1.12   | 217.77   | 27.55   | 0.12        |
|      | 5.03     | VB   | 1.41   | 273.25   | 45.17   | 0.09        |
|      | 6.40     | VB   | 0.34   | 65.71    | 8.69    | 0.12        |
|      | 6.90     | BB   | 90.25  | 17536.81 | 1658.41 | 0.17        |
|      | 8.46     | BB   | 6.89   | 1338.52  | 112.15  | 0.18        |
|      | Sum      |      | 100.00 | 19432.07 |         |             |

Sample Name: DH 356 rac  
 Data file: D:\GONZO\DH\356R1AD.D  
 Sample Info: Laufmittel: n-Heptan/IP 7:3;  
 Die Probe ist in LM/DCM gelöst

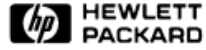

Säule: DAICELAD.M  
 Säuleninfo: Chiralpak AD (250x4,6)mm  
 Operator: Analytik Labor AKEN

Injektion Time: 10:48:55  
 Injektion Date: 06.08.2013

Instrument Conditions: At Start At Stop  
 Temperature in °C: 30.0°C 30.0°C  
 Pressure in bar: 30.2 30.5  
 Flow in ml/min: 1.00 1.00

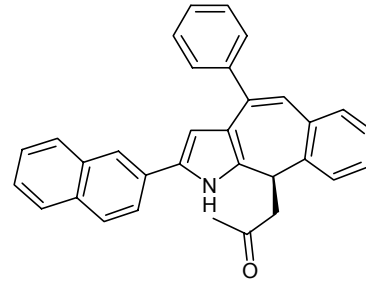

171

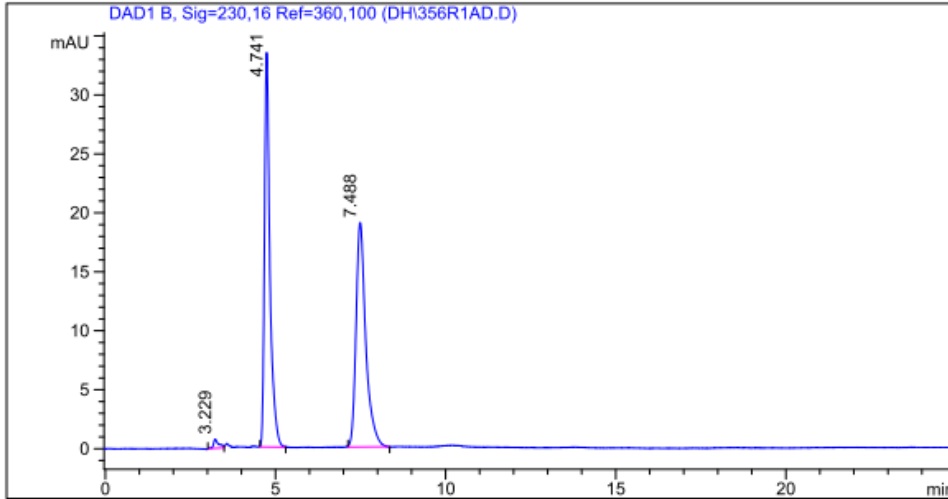

| #     | Ret. Time (min) | Width | Height (mAU) | Area (mAU*s) | Area % |
|-------|-----------------|-------|--------------|--------------|--------|
| 1     | 3.23            | 0.15  | 0.77         | 8.48         | 1.12   |
| 2     | 4.74            | 0.16  | 33.37        | 372.49       | 49.08  |
| 3     | 7.49            | 0.30  | 19.02        | 377.97       | 49.80  |
| Total |                 |       |              | 758.93       | 100.00 |

Sample Name: DH 350-2  
 Data file: D:\GONZO\DH\350-1AD.D  
 Sample Info: Laufmittel: n-Heptan/IP 7:3;  
 Die Probe ist in LM/EtOH gelöst.

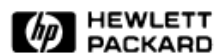

Säule: DAICELAD.M  
 Säuleninfo: Chiralpak AD (250x4,6)mm  
 Operator: Analytik Labor AKEN

Injektion Time: 09:31:06  
 Injektion Date: 13.09.2013

|                        |          |         |
|------------------------|----------|---------|
| Instrument Conditions: | At Start | At Stop |
| Temperature in °C:     | 30.0 °C  | 30.0 °C |
| Pressure in bar:       | 33.0     | 33.8    |
| Flow in ml/min:        | 1.00     | 1.00    |

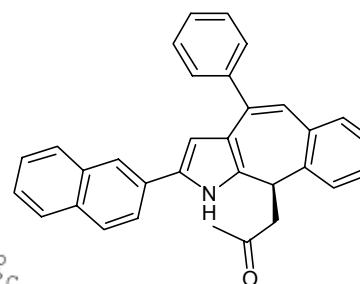

171

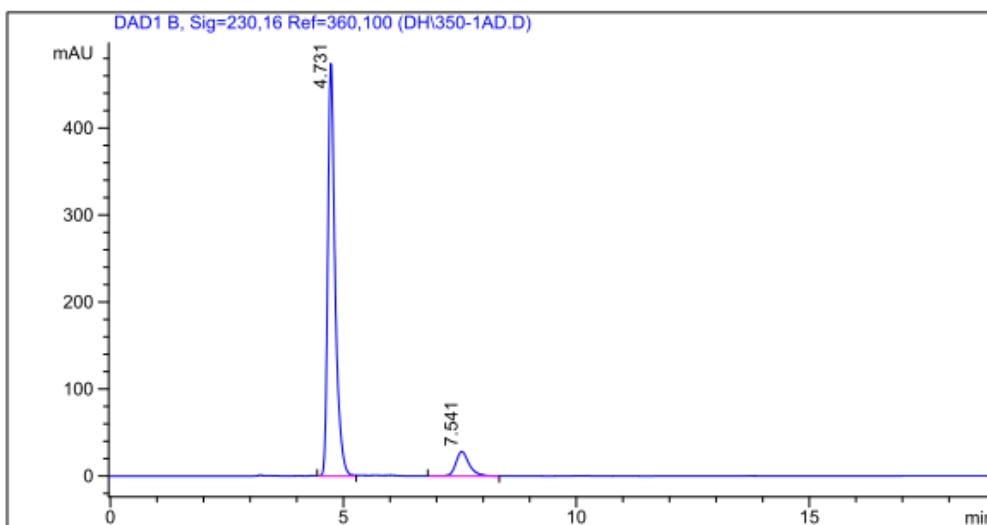

| #     | Ret. Time (min) | Width | Height (mAU) | Area (mAU*s) | Area % |
|-------|-----------------|-------|--------------|--------------|--------|
| 1     | 4.73            | 0.16  | 473.77       | 5170.78      | 90.26  |
| 2     | 7.54            | 0.30  | 28.09        | 558.05       | 9.74   |
| Total |                 |       |              | 5728.83      | 100.00 |

**Sample name:** DH 375 rac  
**Data file:** C:\SNOOPY\DH\375R3IC.D  
**Description:** Laufmittel: n-Heptan/IP 97:3;  
 Die Probe ist im LM/DCM gelöst.  
**Injection date:** 10/22/2013 11:29:05 AM  
**Acq. Analysis method:** CHIRALPAKIC1-6LNP.M

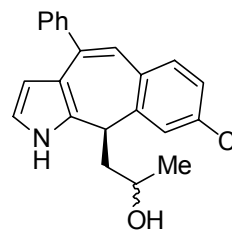

**Column:** Chiralpak IC, (150 x 4,6) mm, 5µ, SN: IC00CD-QF015

**Pressure at start:** 9 bar      **Start flow:** 0.300 ml/min      **Column oven:** 29.98 °C

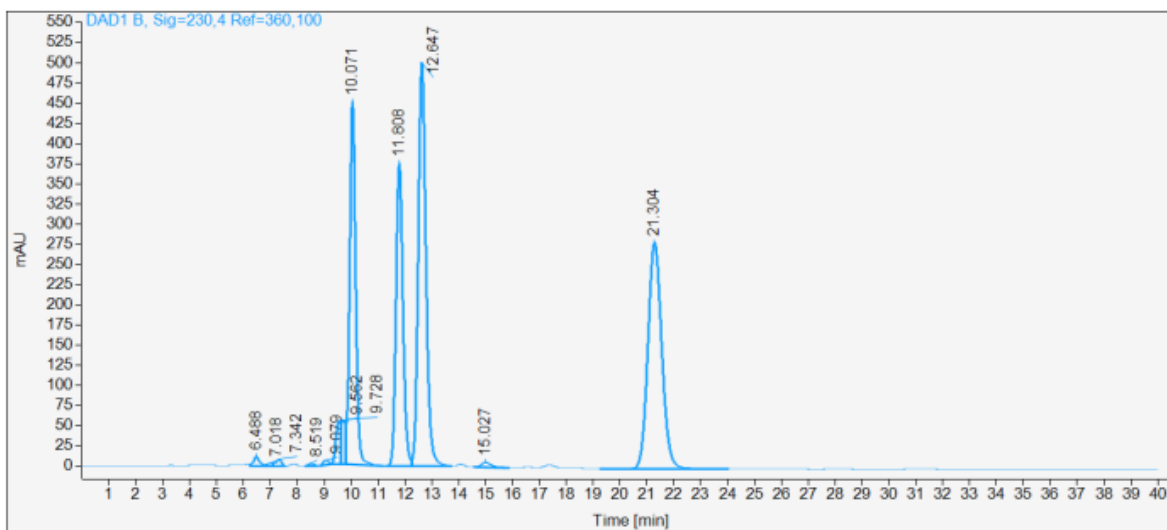

| Name       | RT [min] | Type | Area%  | Area     | Height | Width [min] |
|------------|----------|------|--------|----------|--------|-------------|
| DH 375 rac | 6.49     | VV   | 0.52   | 184.58   | 11.87  | 0.22        |
|            | 7.02     | VV   | 0.17   | 61.94    | 4.43   | 0.19        |
|            | 7.34     | VB   | 0.35   | 125.10   | 8.61   | 0.21        |
|            | 8.52     | BB   | 0.13   | 45.54    | 3.27   | 0.22        |
|            | 9.08     | BB   | 0.20   | 70.22    | 5.39   | 0.22        |
|            | 9.56     | BV   | 1.81   | 640.52   | 53.48  | 0.18        |
|            | 9.73     | VV   | 1.58   | 559.69   | 54.54  | 0.15        |
|            | 10.07    | VB   | 19.67  | 6976.03  | 450.02 | 0.24        |
|            | 11.81    | BV   | 18.84  | 6683.89  | 374.93 | 0.28        |
|            | 12.65    | VB   | 27.96  | 9915.77  | 500.16 | 0.31        |
|            | 15.03    | BB   | 0.45   | 161.28   | 6.18   | 0.40        |
|            | 21.30    | BB   | 28.32  | 10045.18 | 280.10 | 0.55        |
|            | Sum      |      | 100.00 | 35469.74 |        |             |

**Sample name:** DH 373  
**Data file:** C:\SNOOPY\DH\373IC.D  
**Description:** Laufmittel: n-Heptan/IP 97:3;  
 Die Probe ist im LM/DCM gelöst.  
**Injection date:** 10/22/2013 12:10:14 PM  
**Acq. Analysis method:** CHIRALPAKIC1-6LNP.M

**Column:** Chiralpak IC, (150 x 4,6) mm, 5µ, SN: IC00CD-QF015

**Pressure at start:** 9 bar      **Start flow:** 0.300 ml/min      **Column oven:** 30 °C

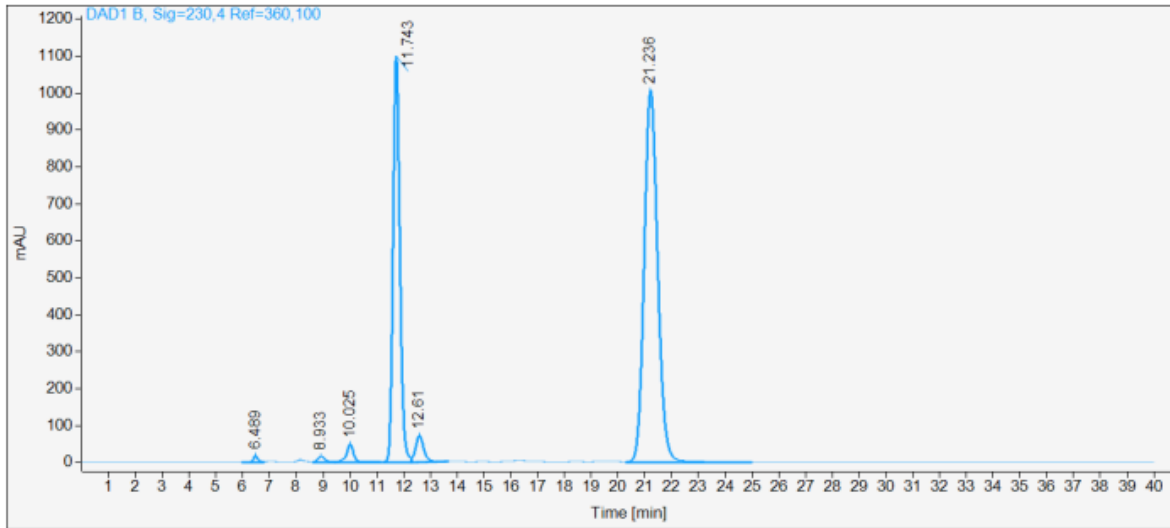

| Name     | DH 373 |        |          |         |             |
|----------|--------|--------|----------|---------|-------------|
| RT [min] | Type   | Area%  | Area     | Height  | Width [min] |
| 6.49     | BV     | 0.35   | 201.93   | 17.63   | 0.17        |
| 8.93     | VV     | 0.49   | 279.76   | 15.21   | 0.28        |
| 10.03    | VB     | 1.50   | 859.88   | 48.55   | 0.26        |
| 11.74    | BV     | 33.77  | 19329.81 | 1097.97 | 0.27        |
| 12.61    | VB     | 2.61   | 1494.24  | 70.54   | 0.32        |
| 21.24    | BB     | 61.28  | 35078.64 | 1005.01 | 0.54        |
|          | Sum    | 100.00 | 57244.26 |         |             |

Sample Name: DH 371  
 Data file: D:\ERNIE\DH\371AS.D  
 Sample Info: Laufmittel: n-Heptan/EtOH 9:1;  
 Die Probe ist in DCM/LM gelöst

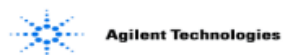

Säule: DAICELAS.M  
 Säuleninfo: Chiralpak AS (250 x 4.6)mm 10µ

Operator: Analytik Labor AKEN

Injektion Time: 09:31:28  
 Injektion Date: 14.10.2013

| Instrument Conditions: | At Start | At Stop |
|------------------------|----------|---------|
| Temperature in°C:      | 30.0     | 30.0    |
| Pressure in bar:       | 21.2     | 20.8    |
| Flow in ml/min:        | 0.7      | 0.7     |

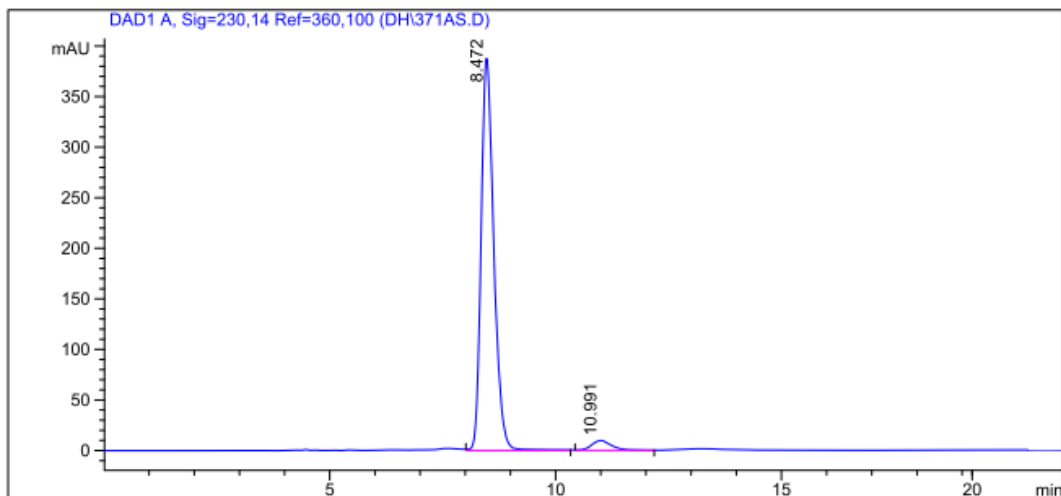

| #     | Ret. Time (min) | Width | Height (mAU) | Area (mAU*s) | Area % |
|-------|-----------------|-------|--------------|--------------|--------|
| 1     | 8.47            | 0.30  | 388.04       | 7540.75      | 96.09  |
| 2     | 10.99           | 0.47  | 9.77         | 307.02       | 3.91   |
| Total |                 |       |              | 7847.77      | 100.00 |



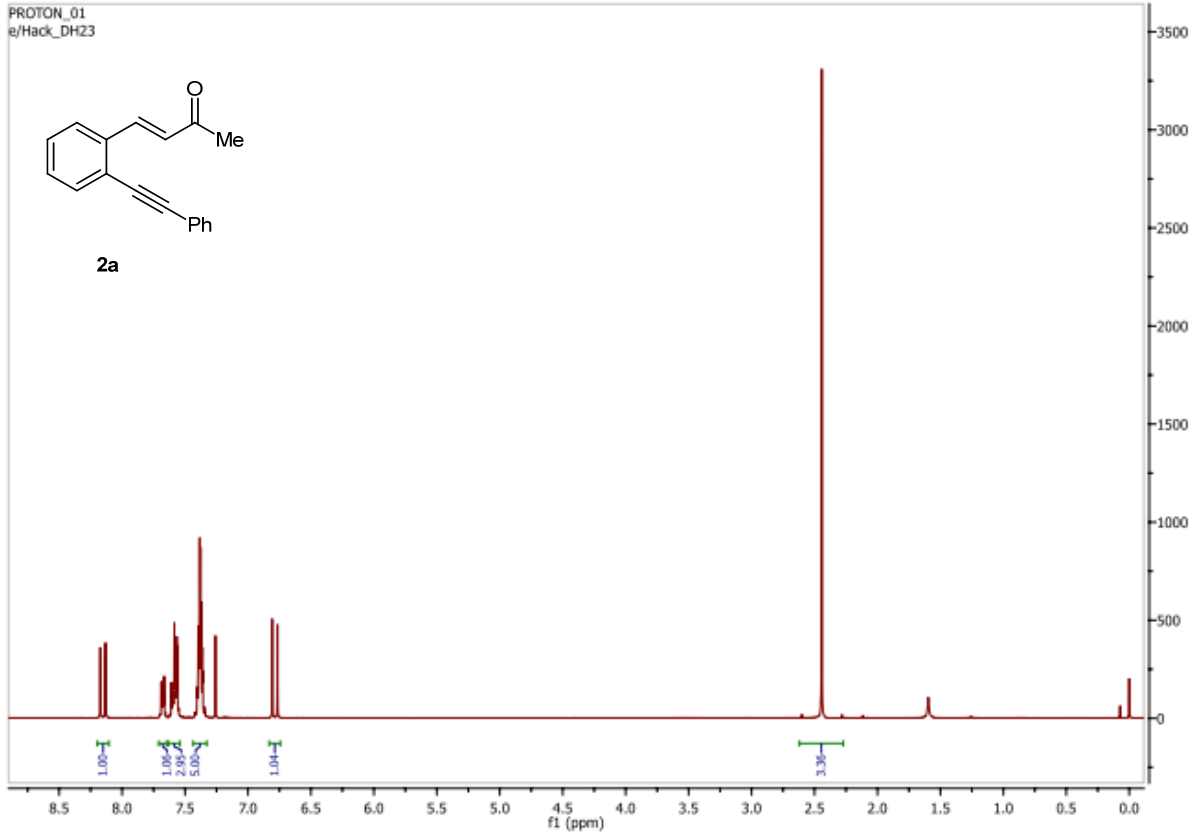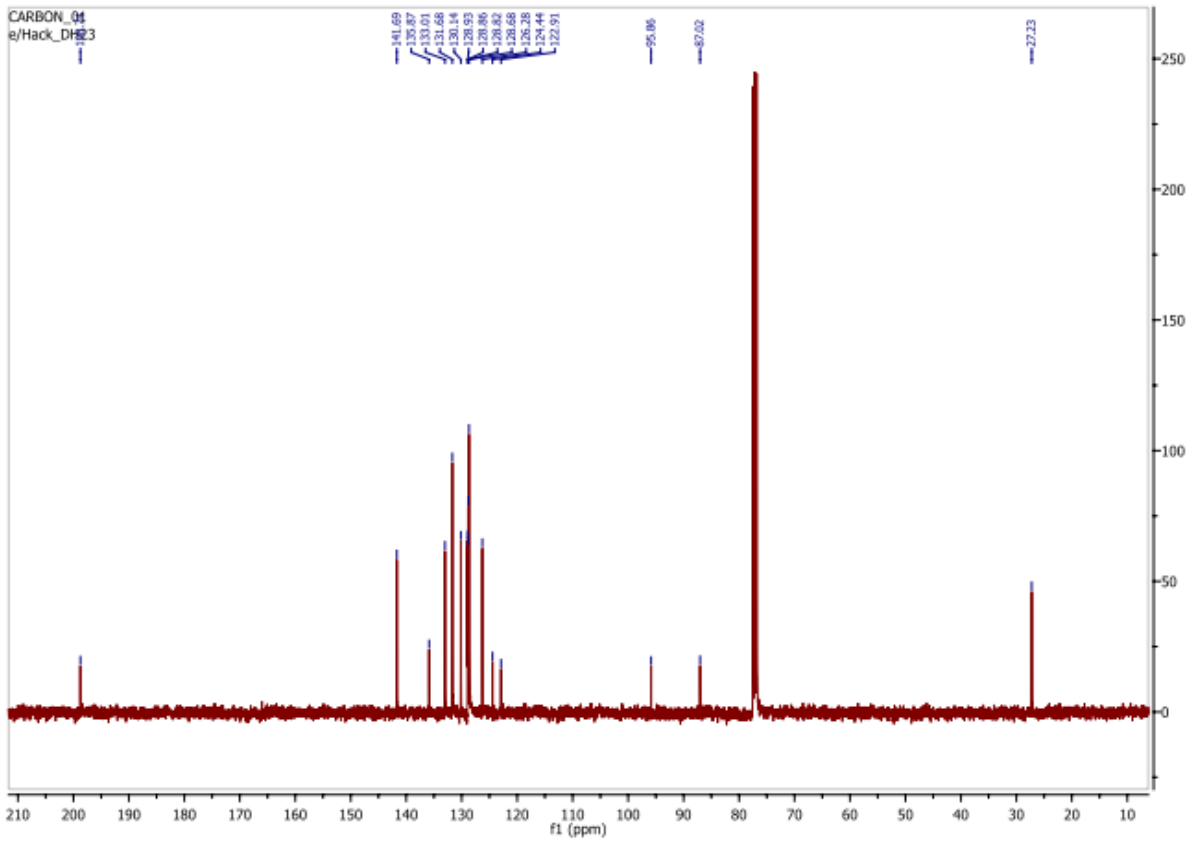

PROTON\_01  
e/hartmann\_jh33

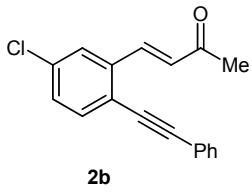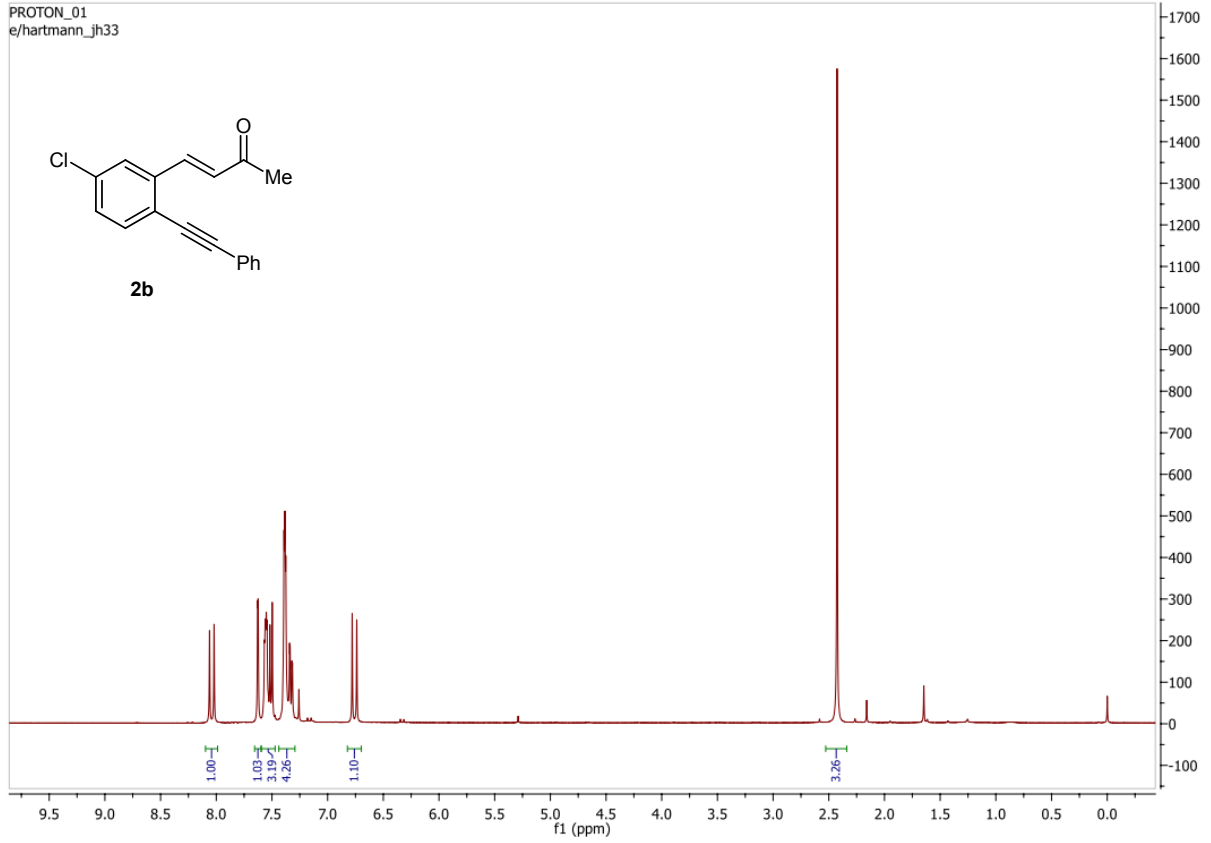

CARBON\_01  
e/hartmann\_jh33

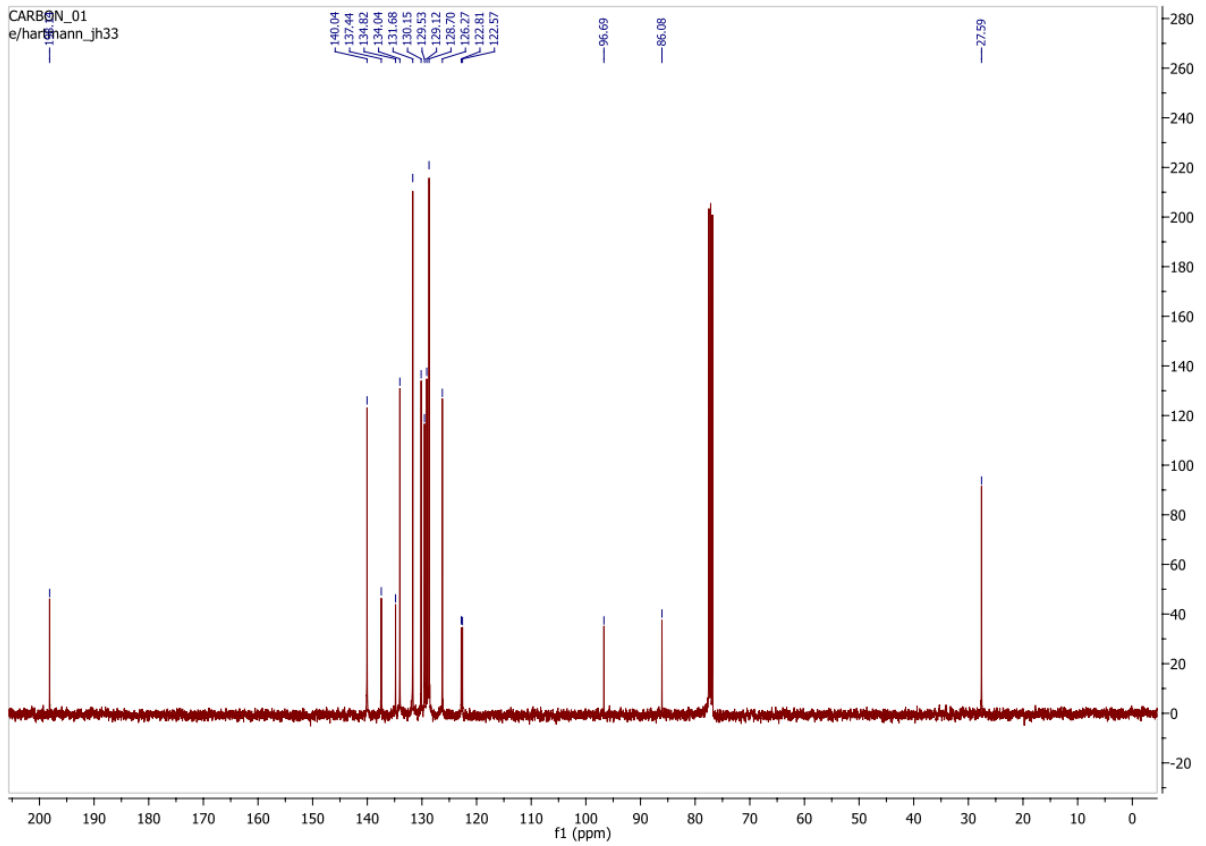

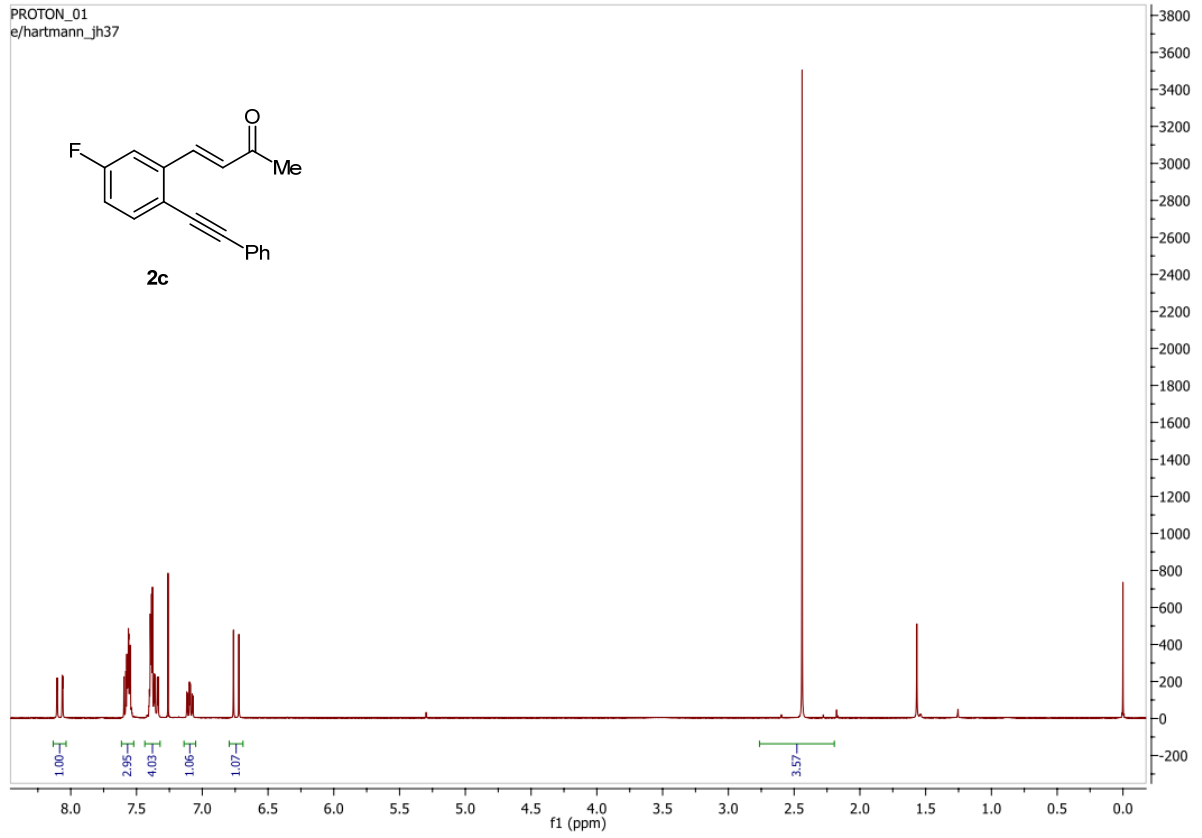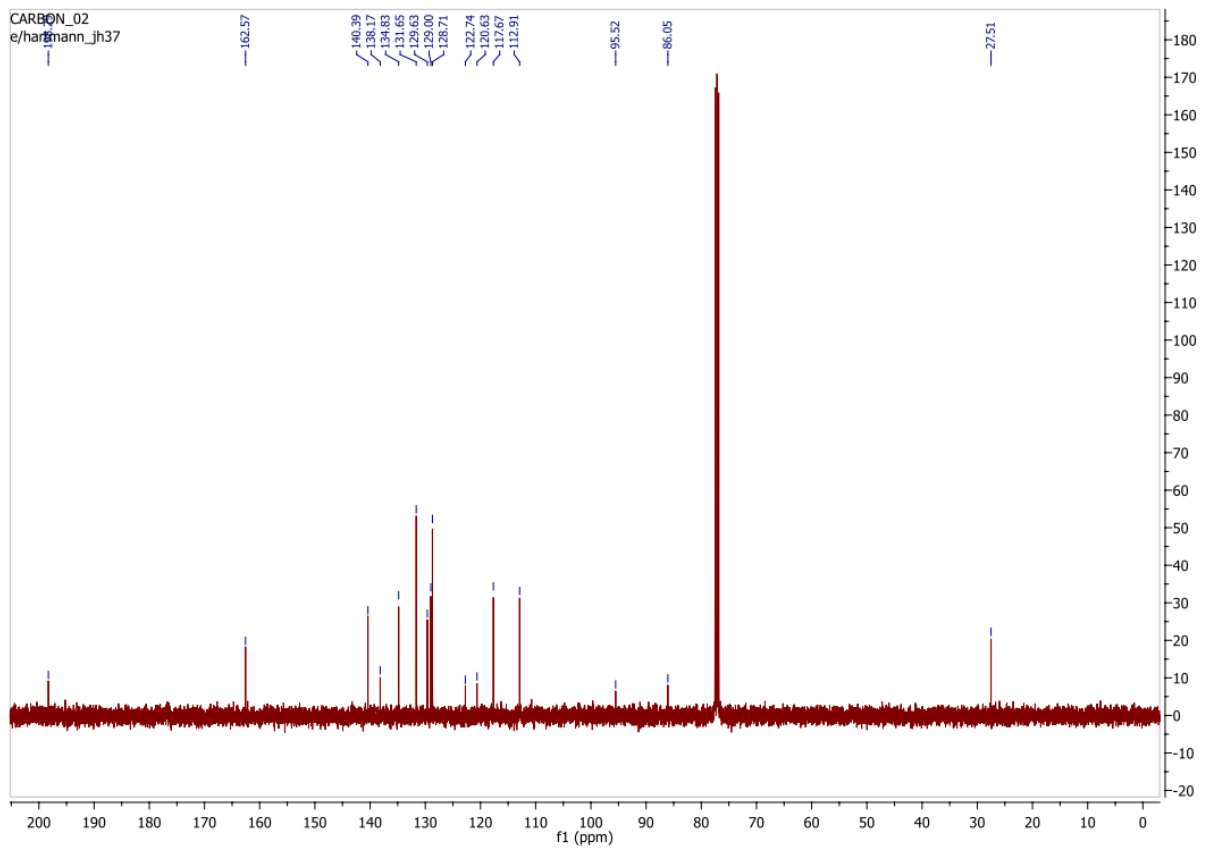

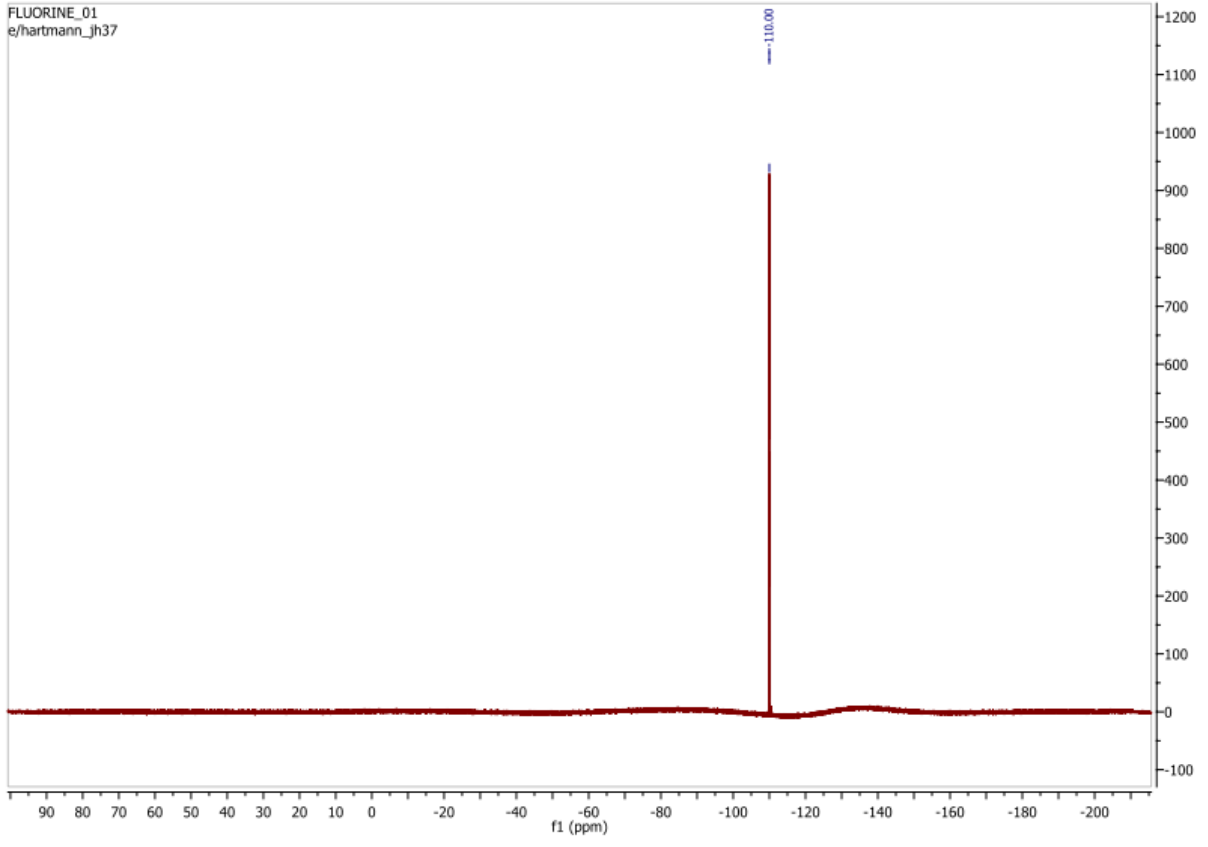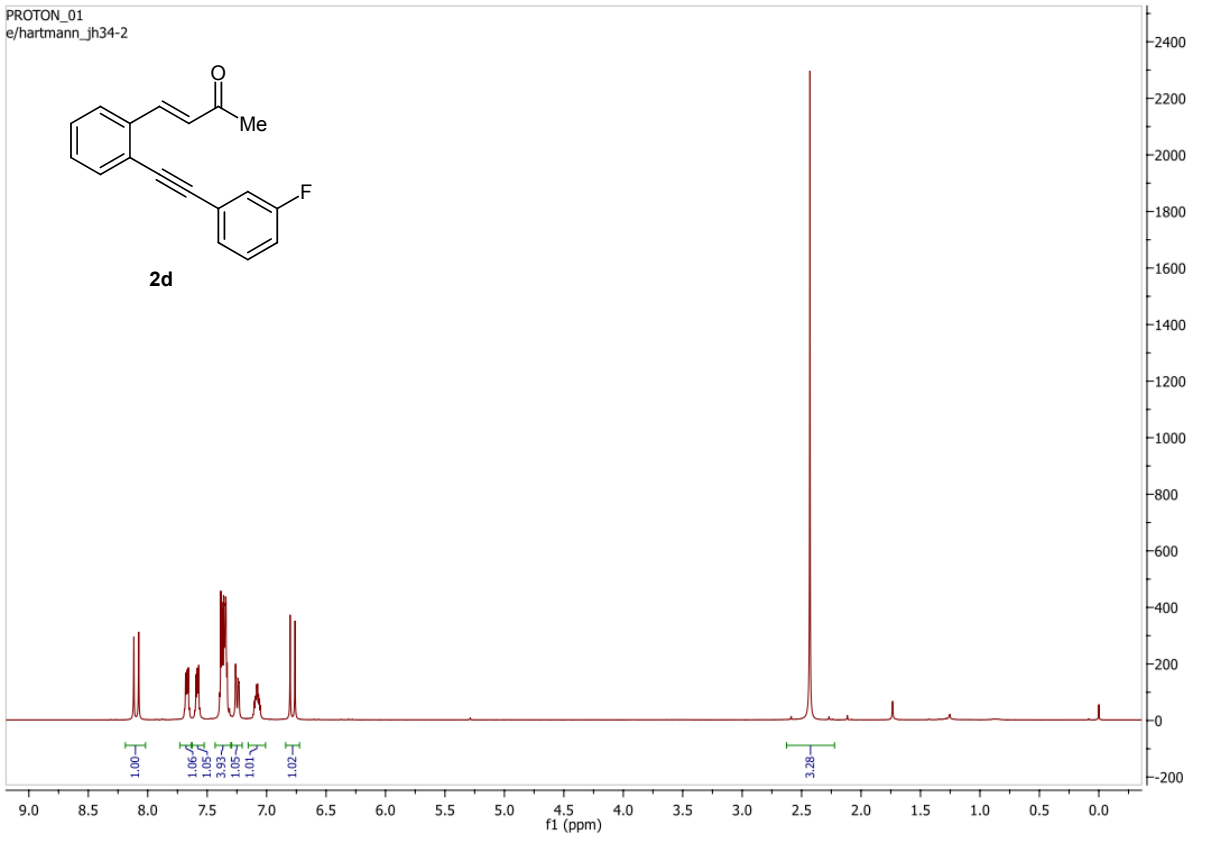

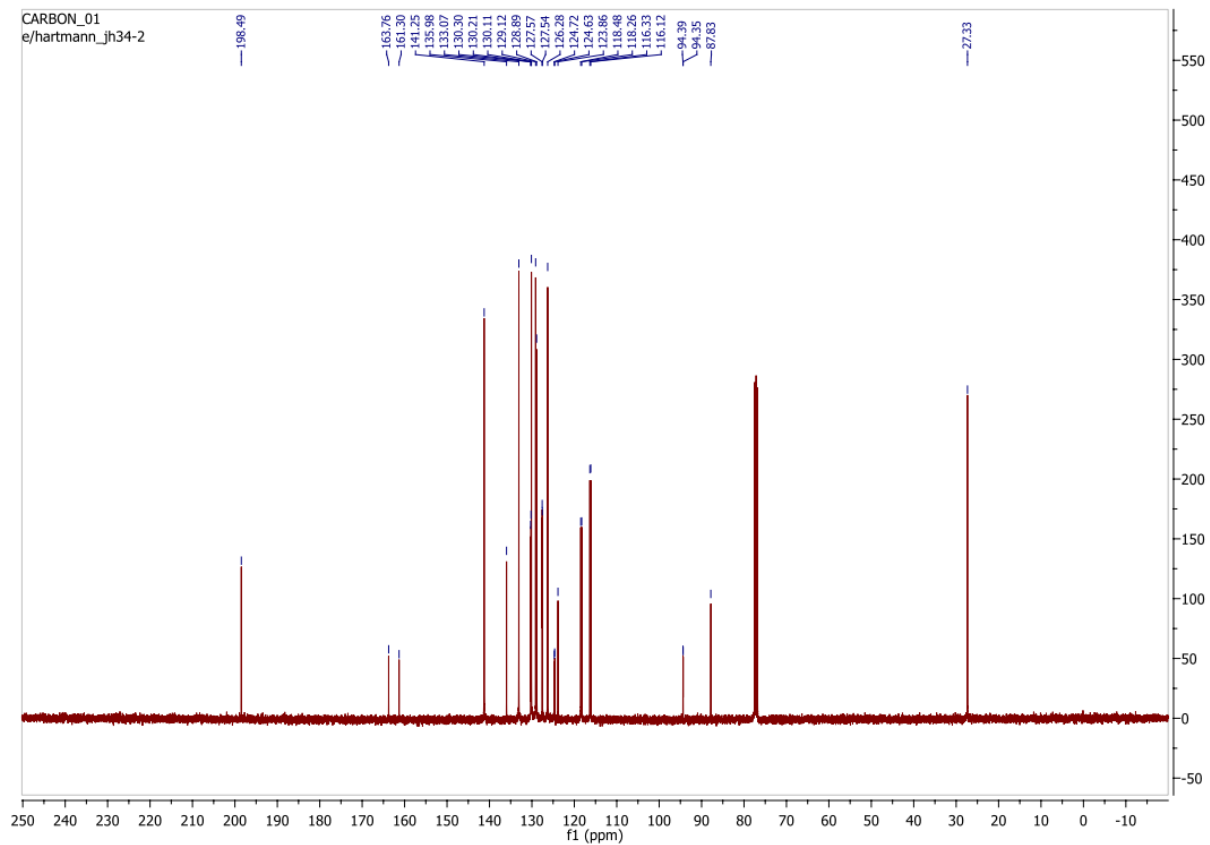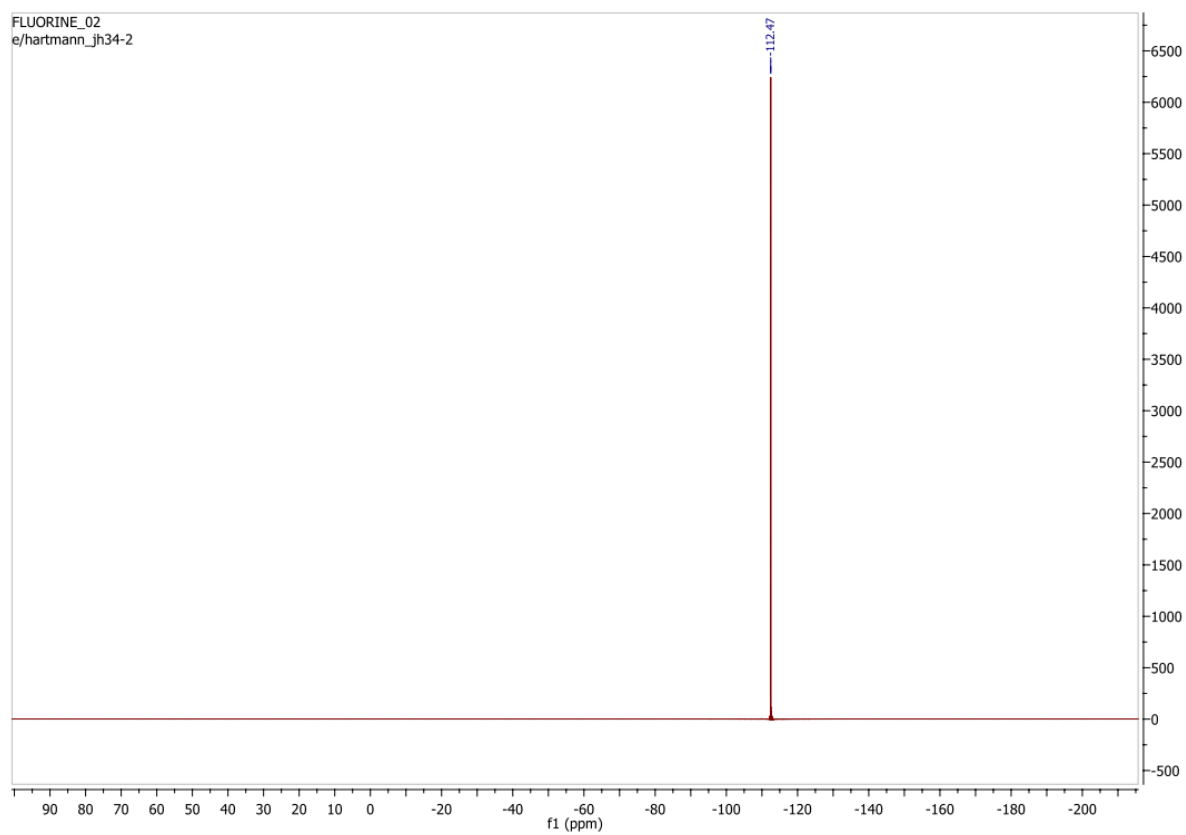

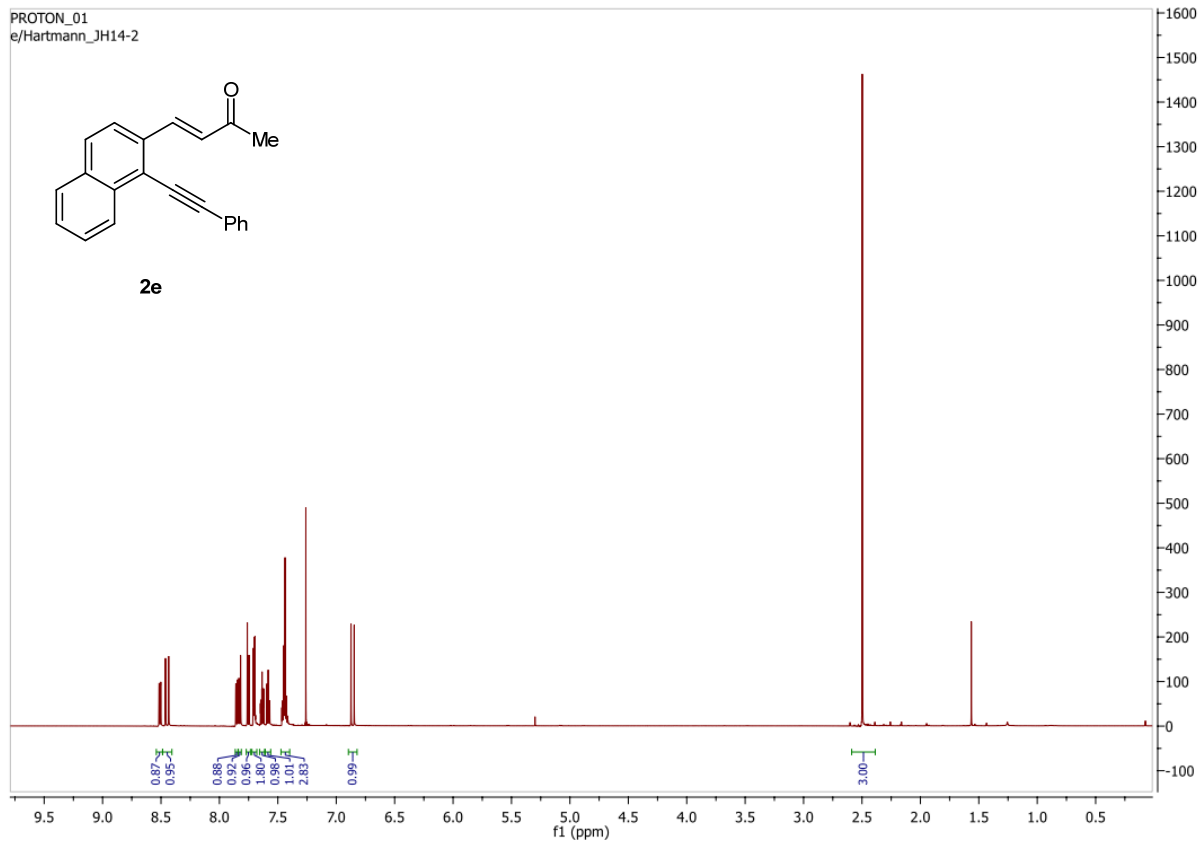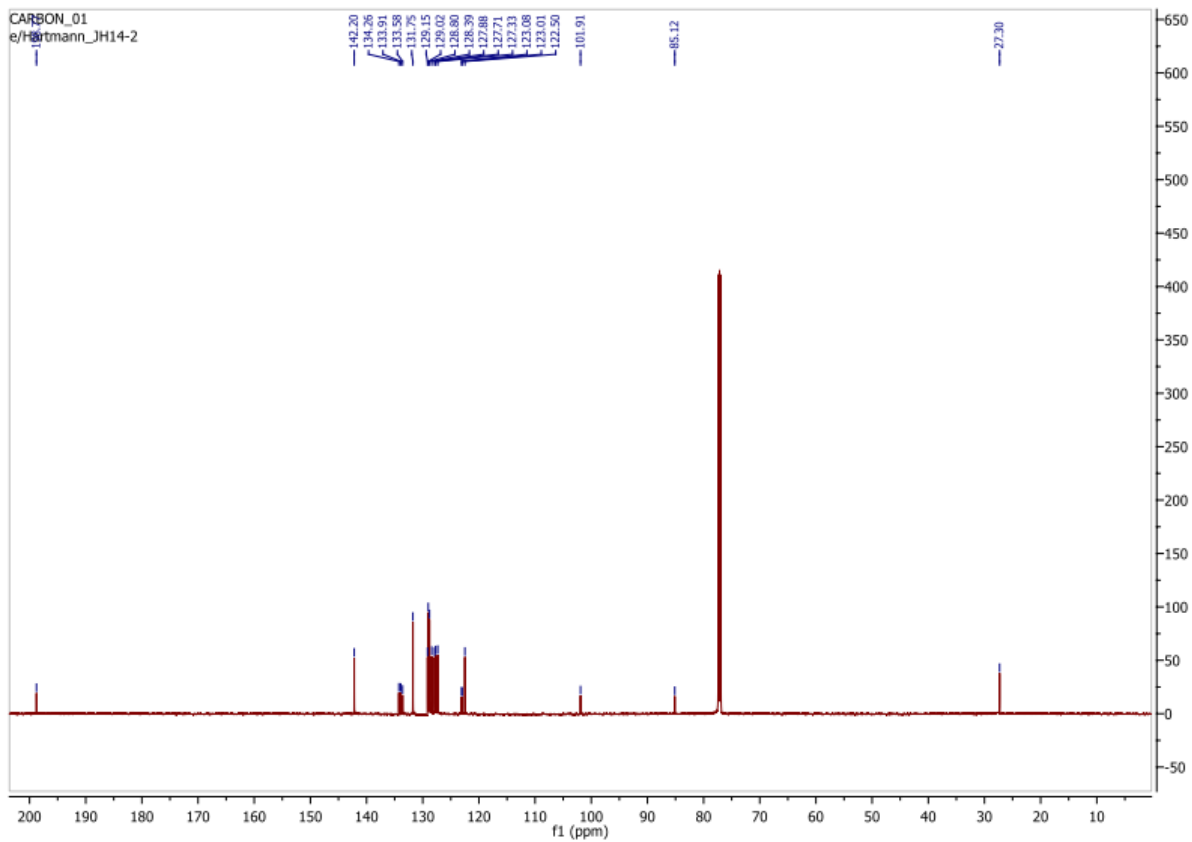

PROTON\_01  
e/Hartmann\_JH15-2

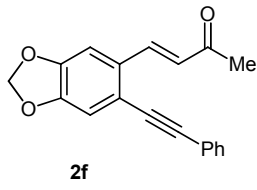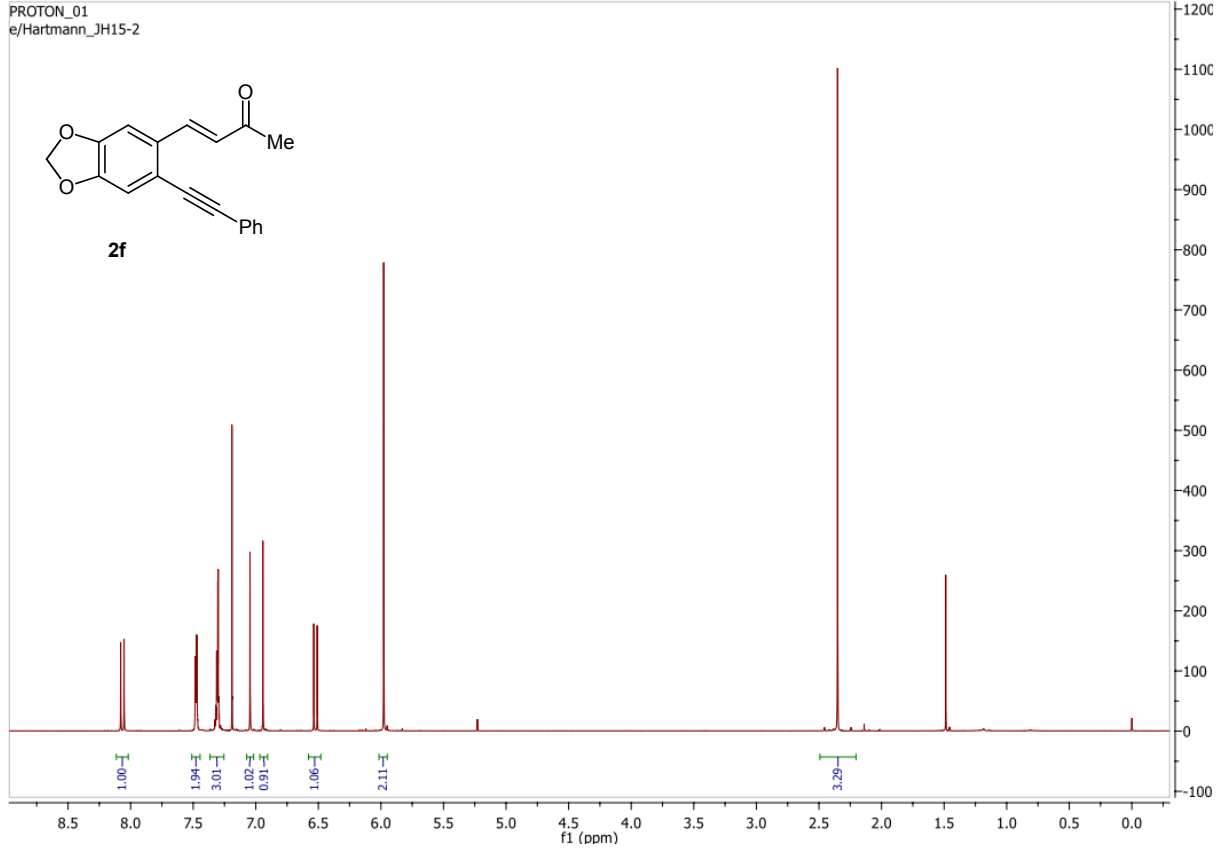

CARBON\_01  
e/Hartmann\_JH15-2

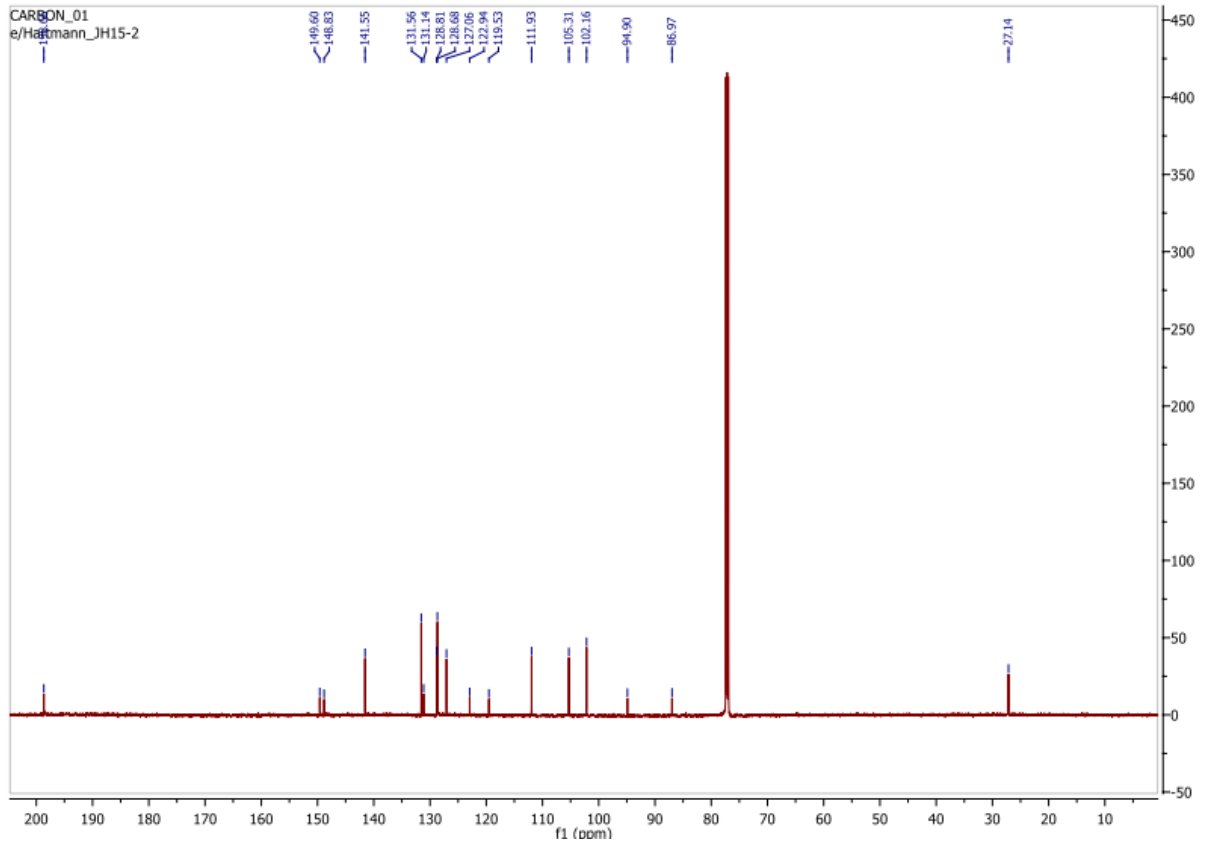

PROTON\_01  
e/Hartmann\_JH18

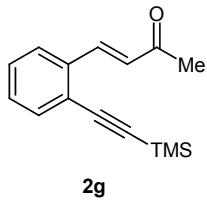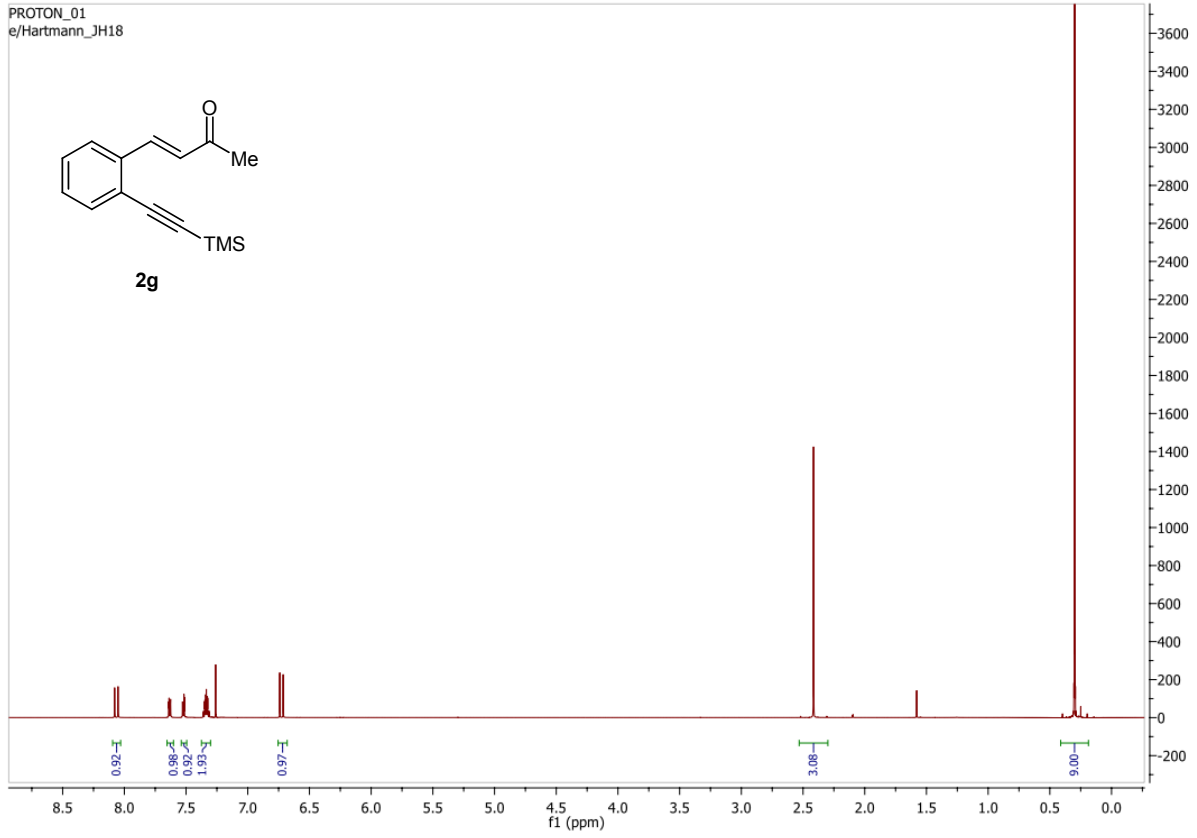

CARBON\_01  
e/Hartmann\_JH18

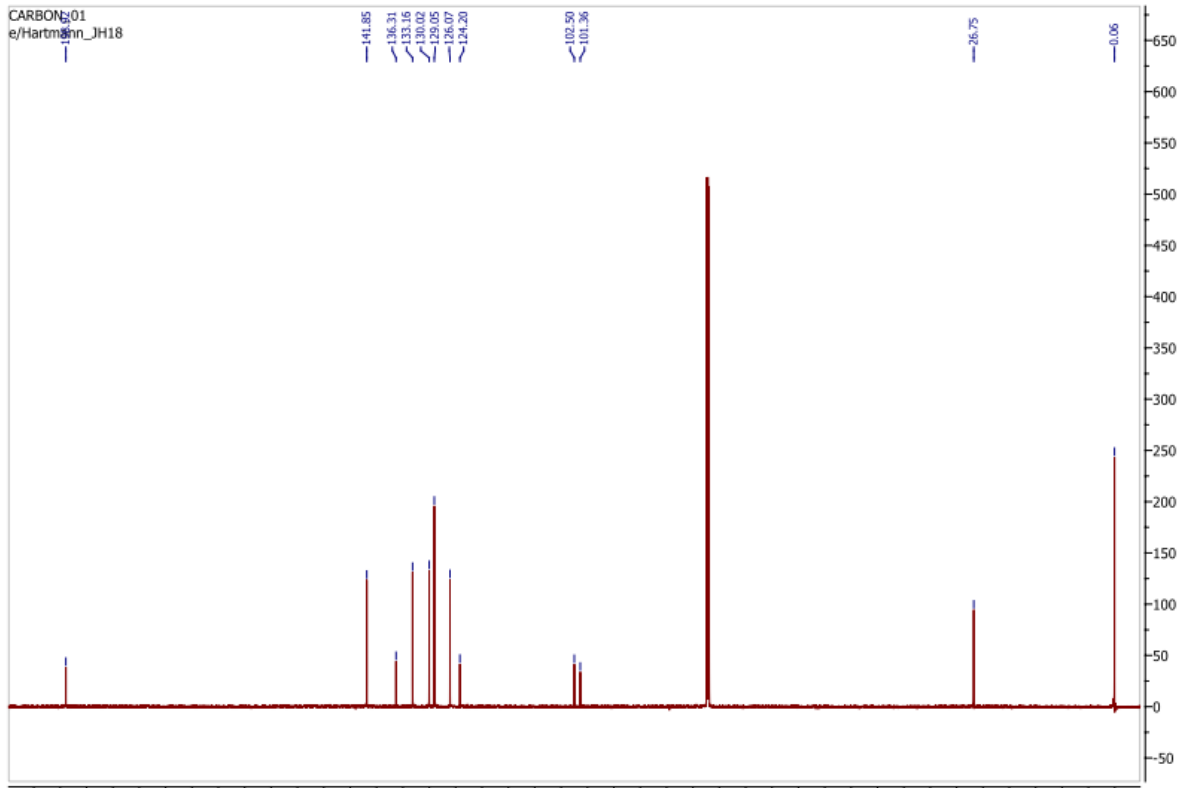



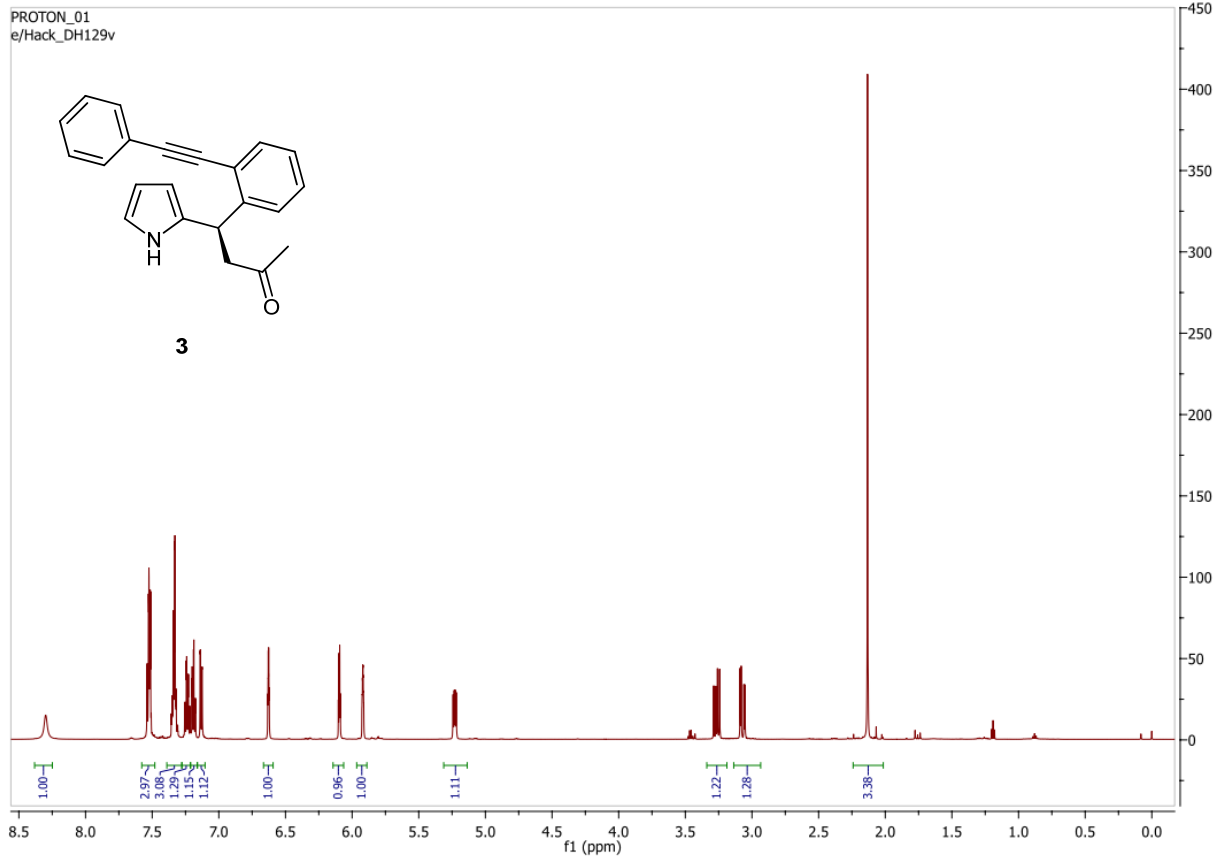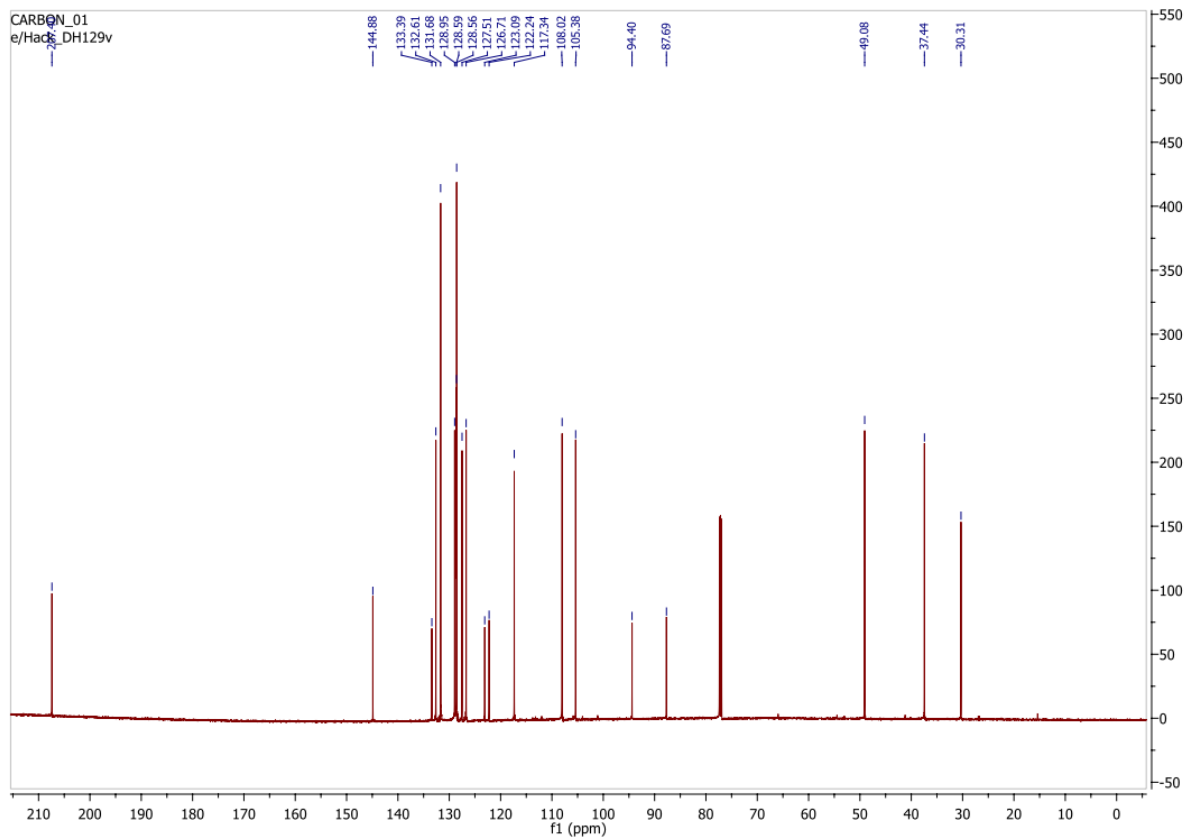

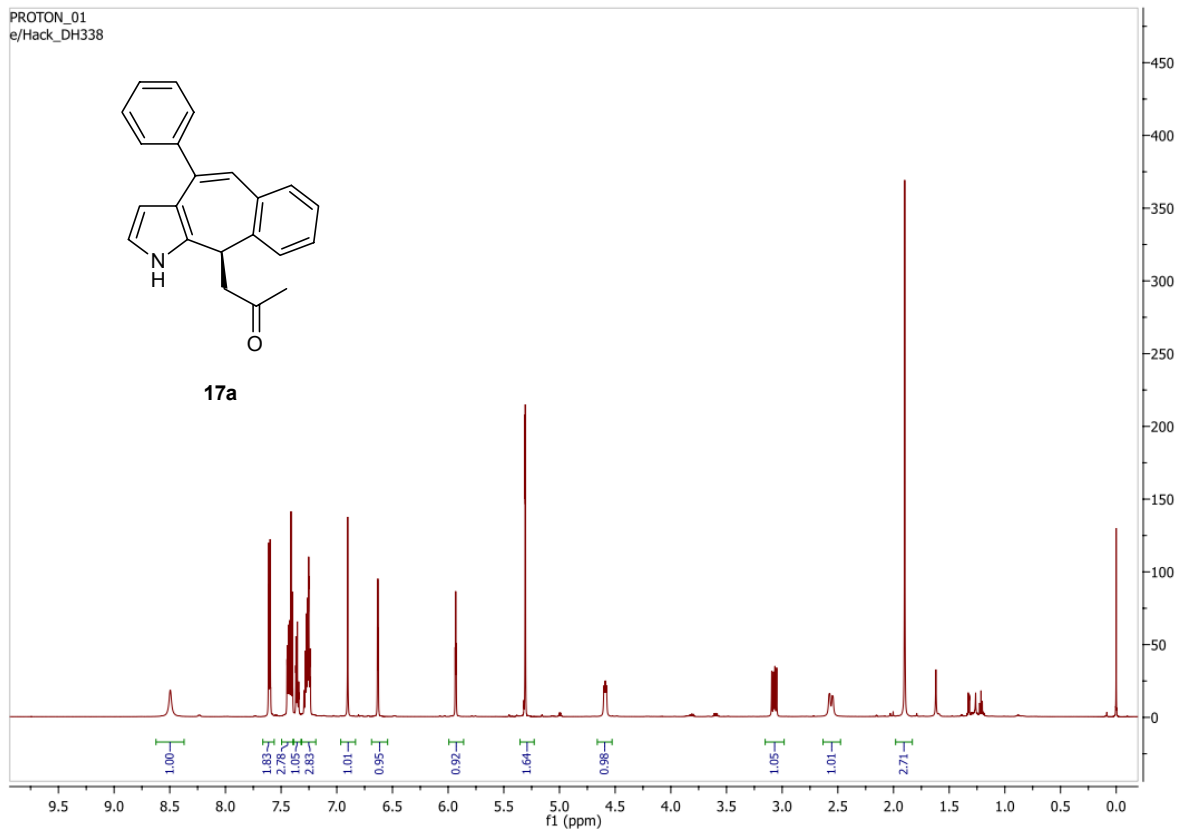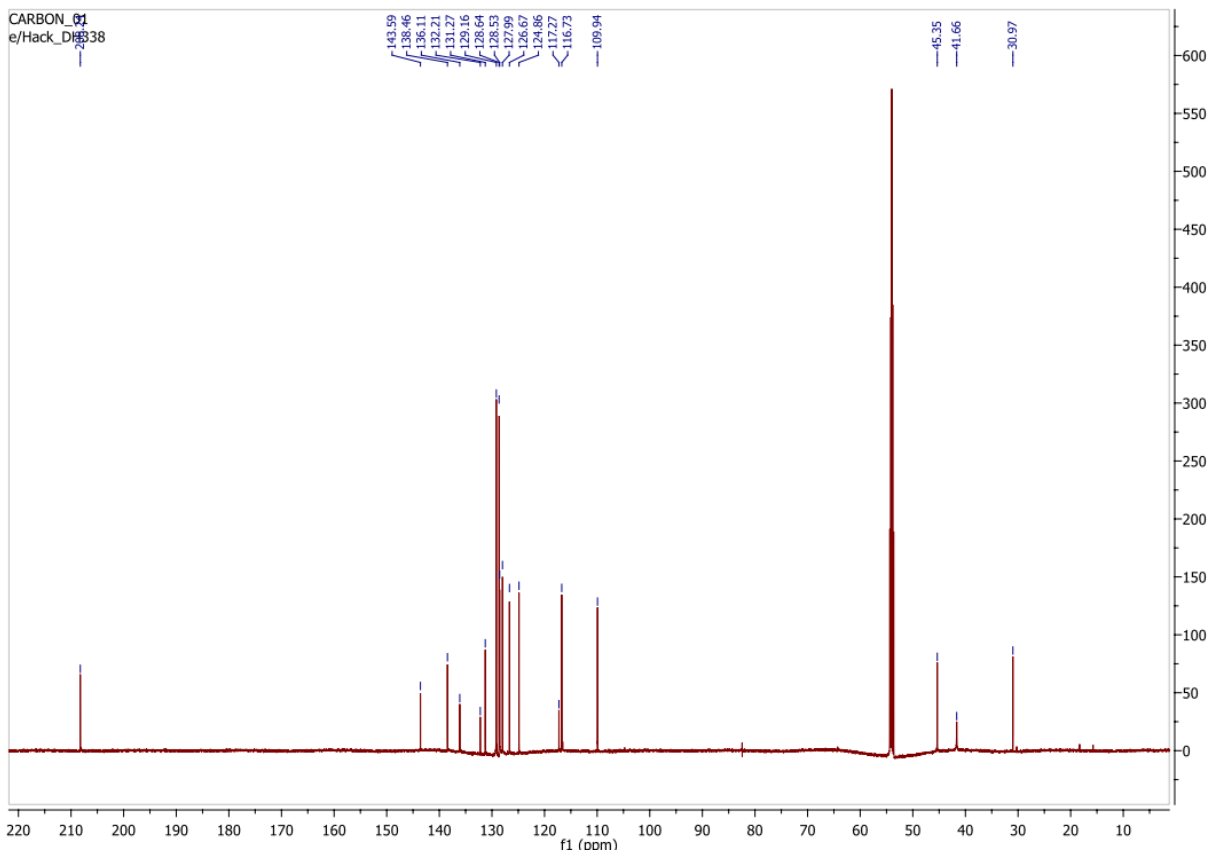

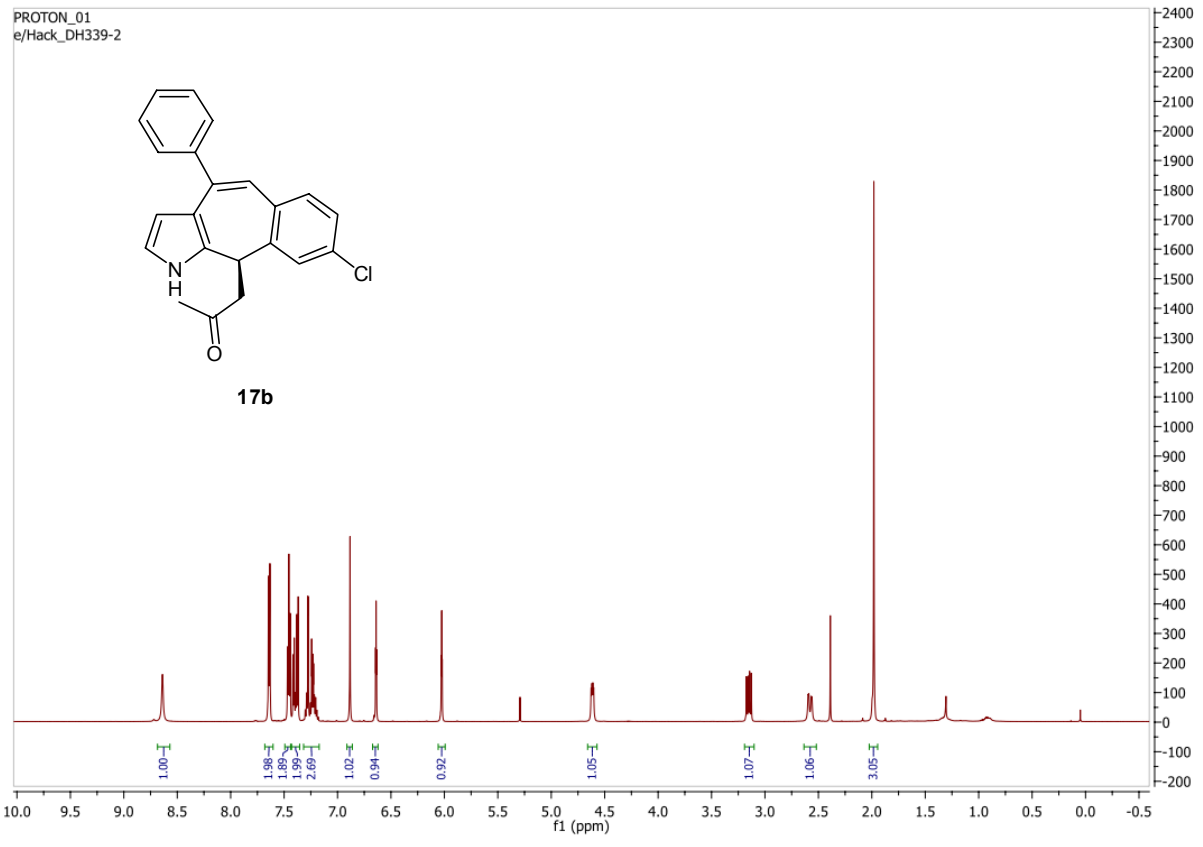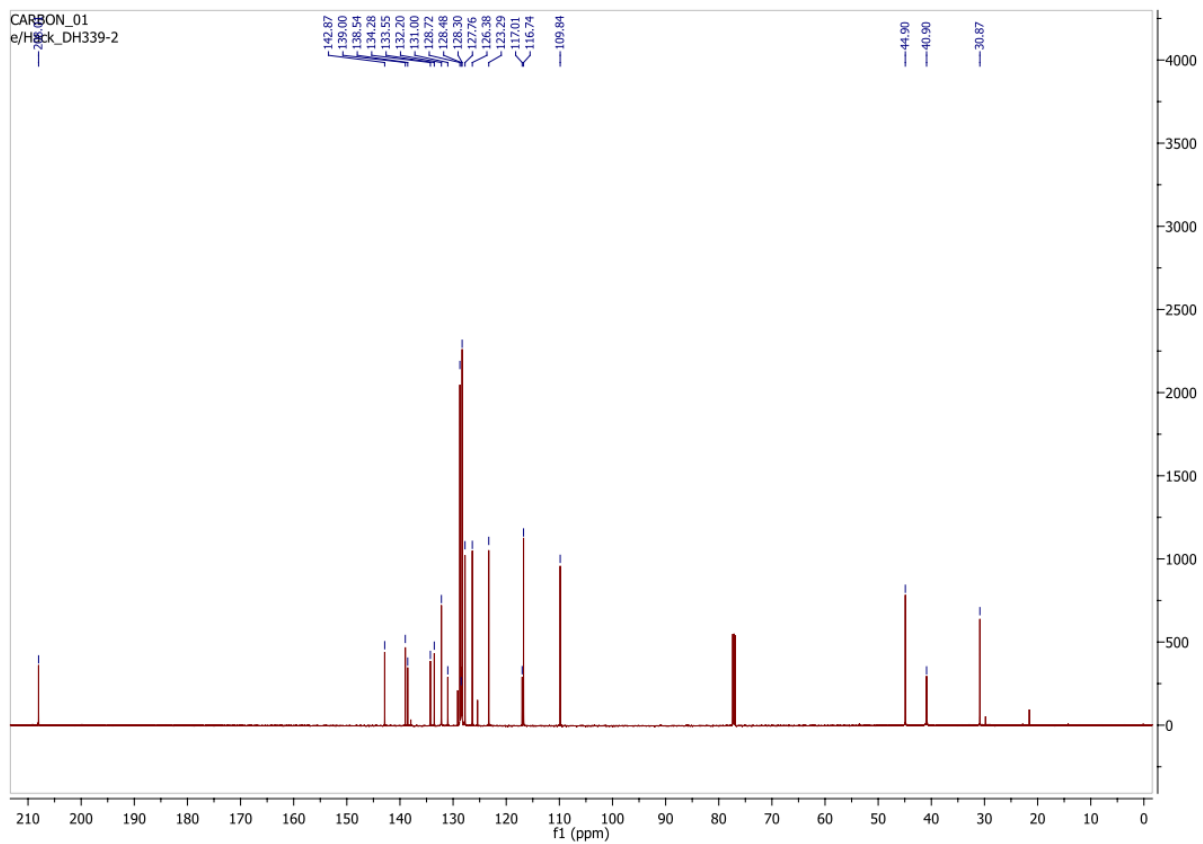

PROTON\_01  
e/Hack\_DH340-2

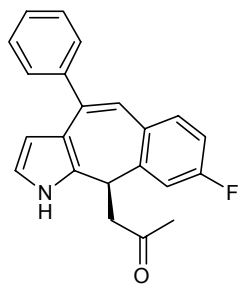

17c

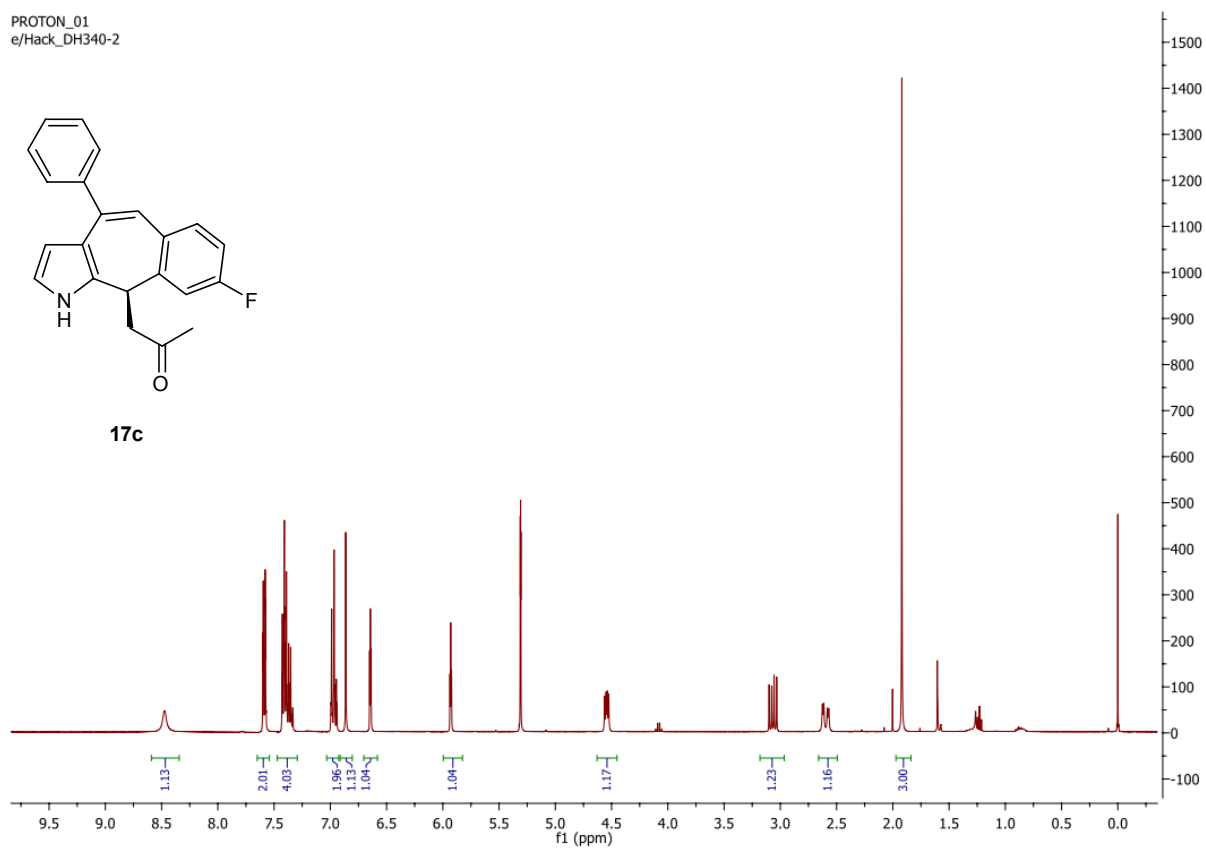

CARBON\_01  
e/Hack\_DH340-2

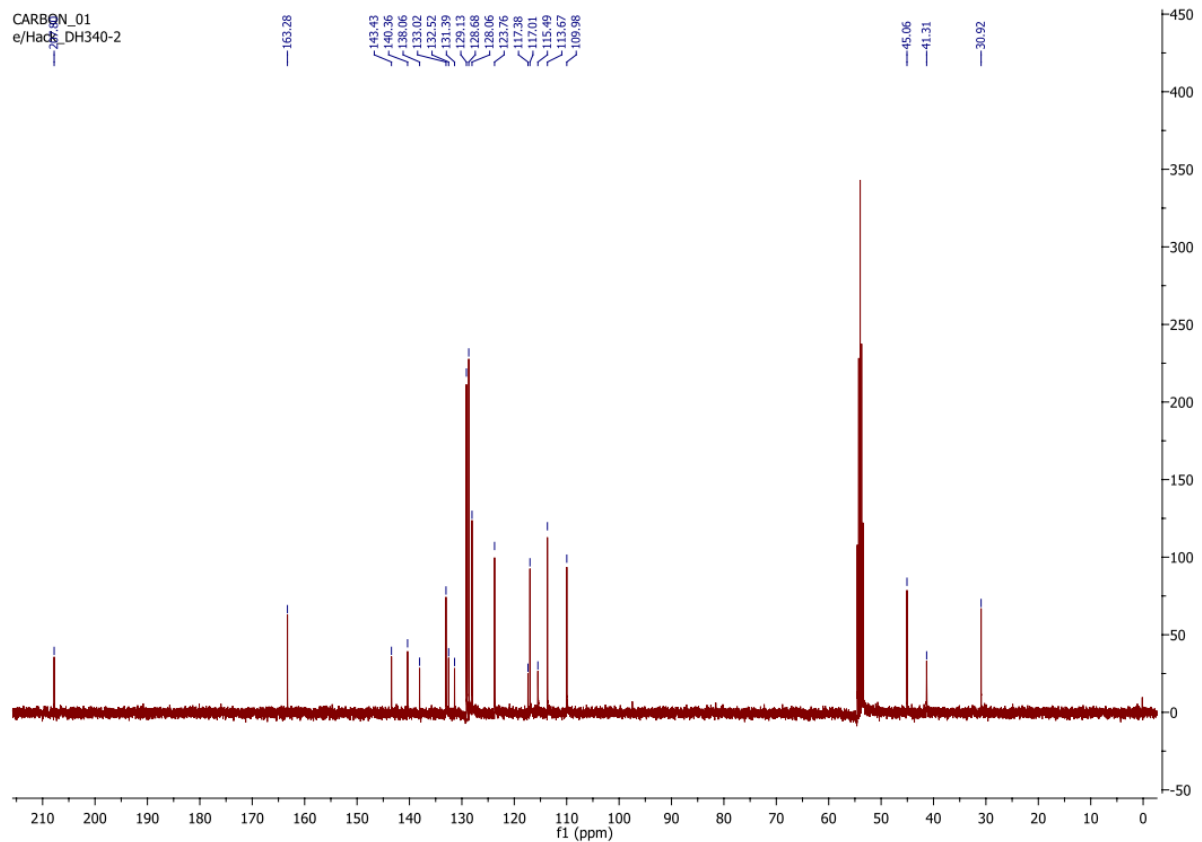

FLUORINE\_01  
e/Hack\_DH340-2

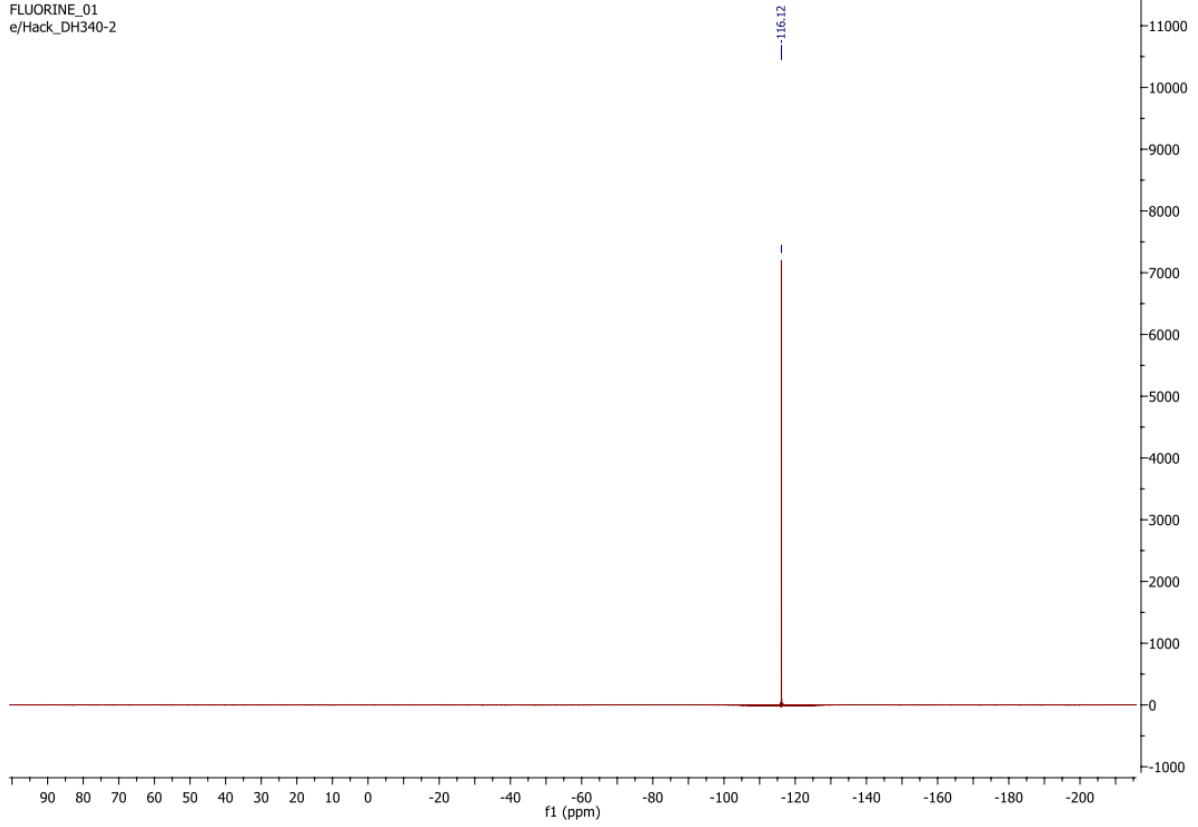

PROTON\_01  
e/Hack\_DH341

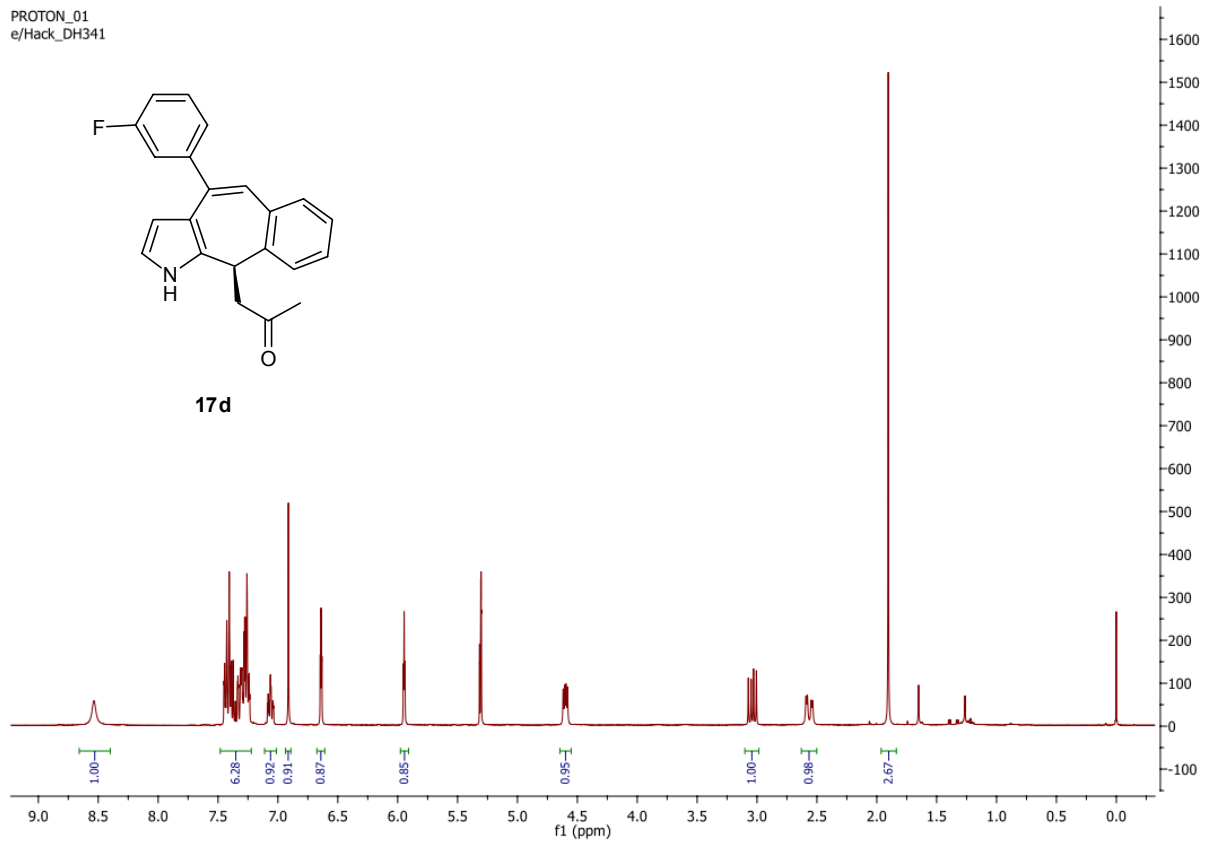

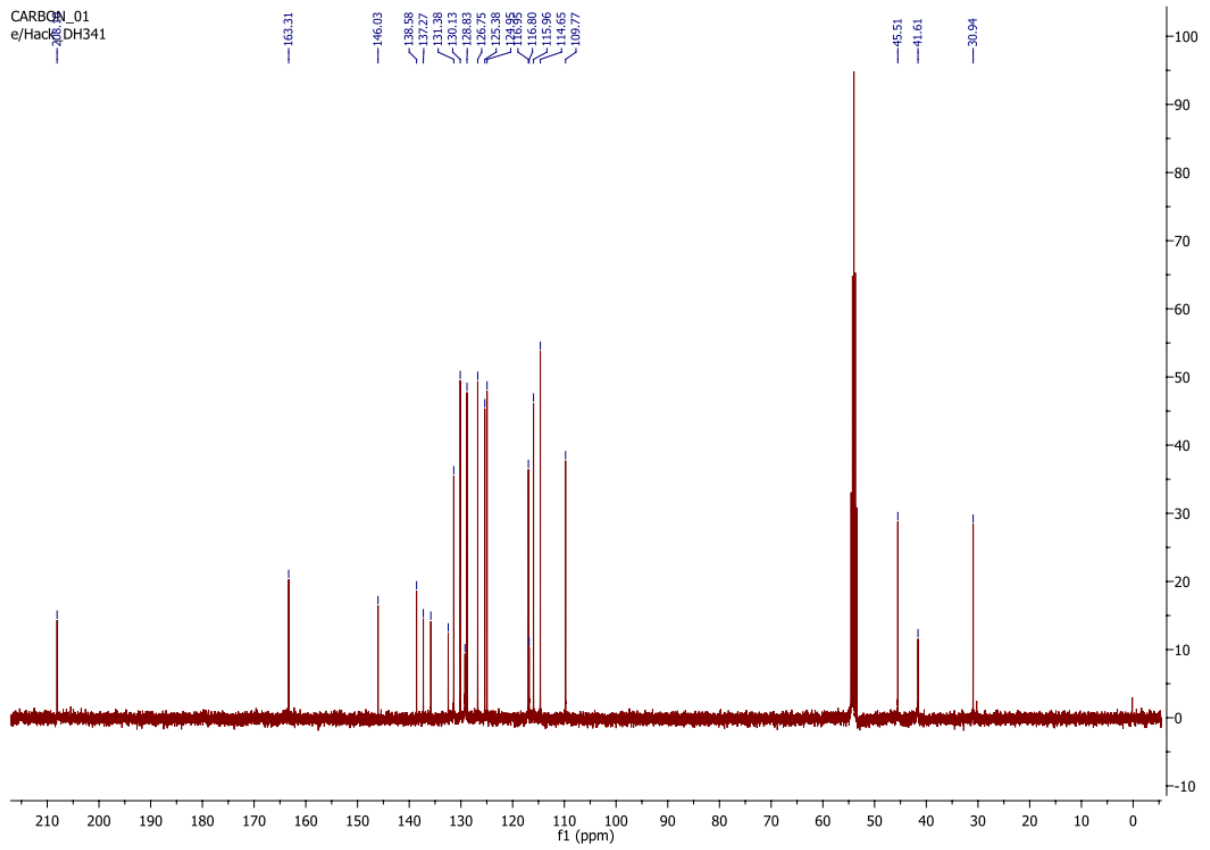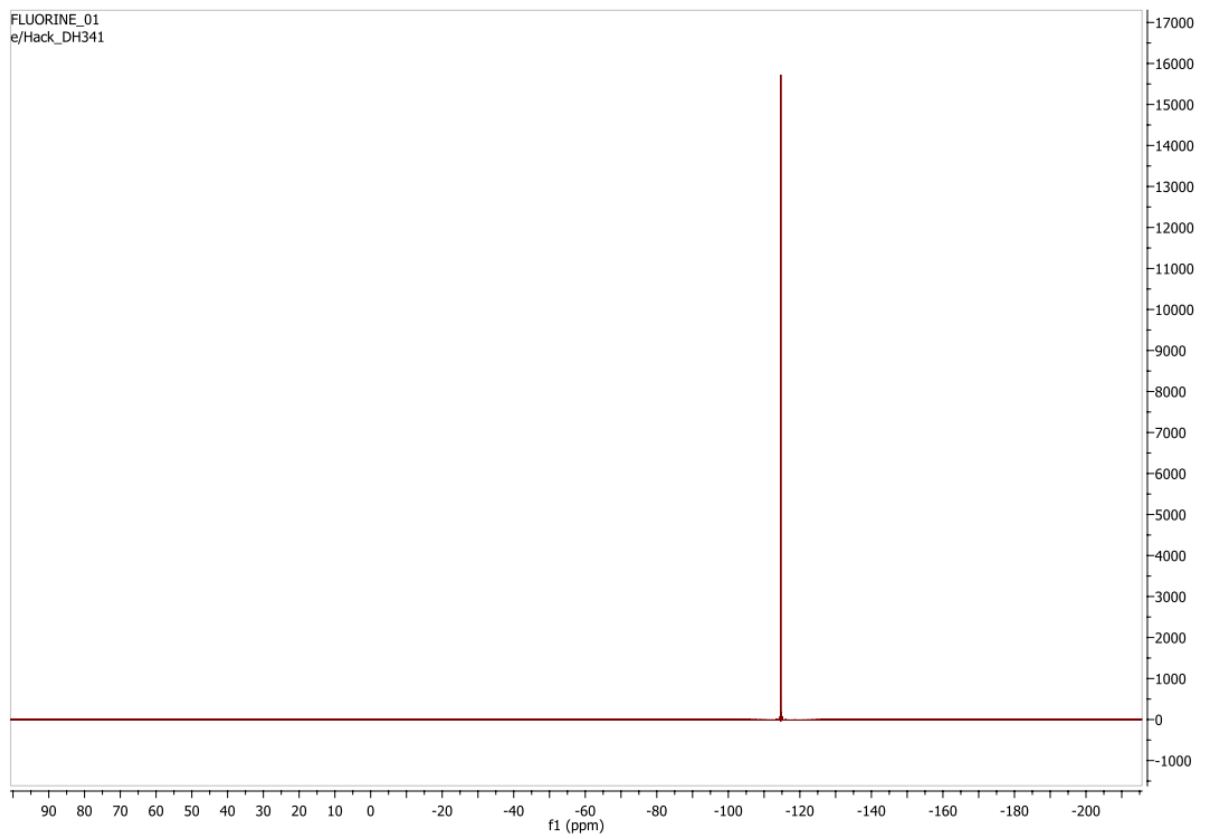

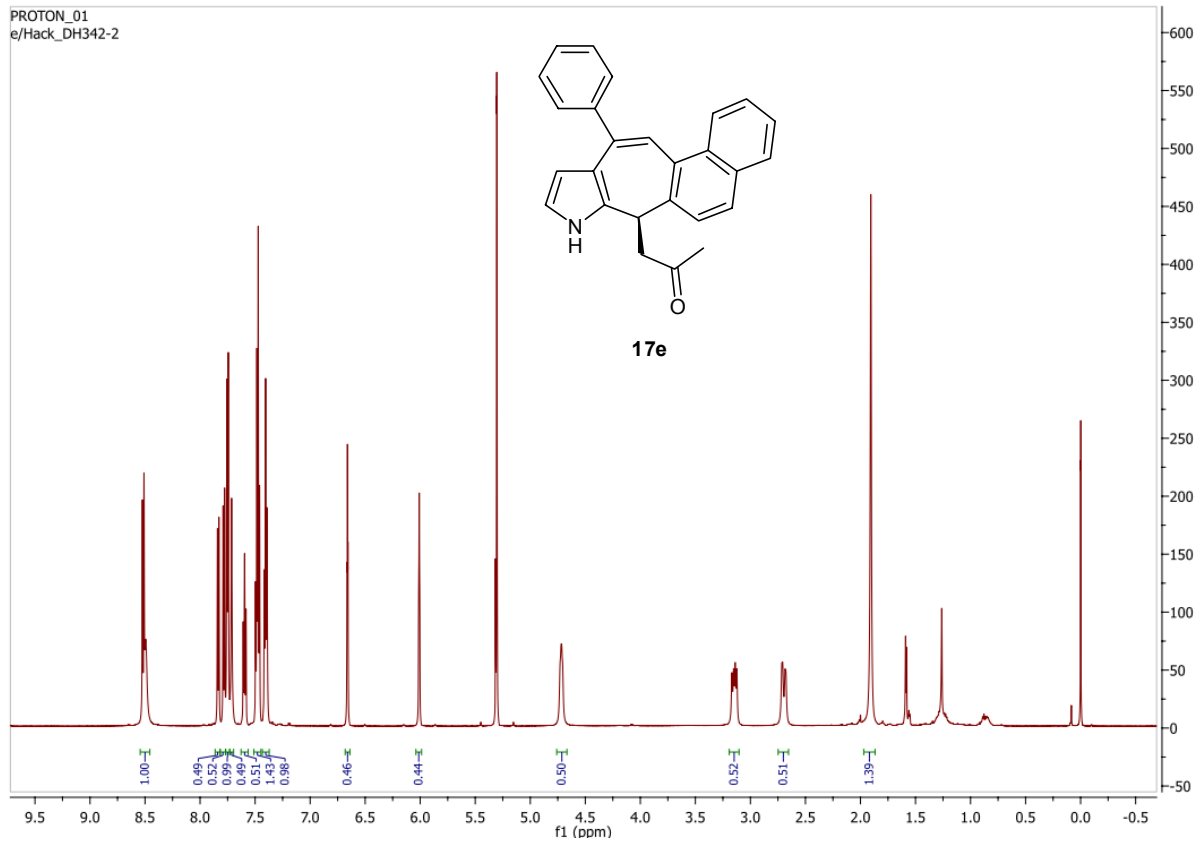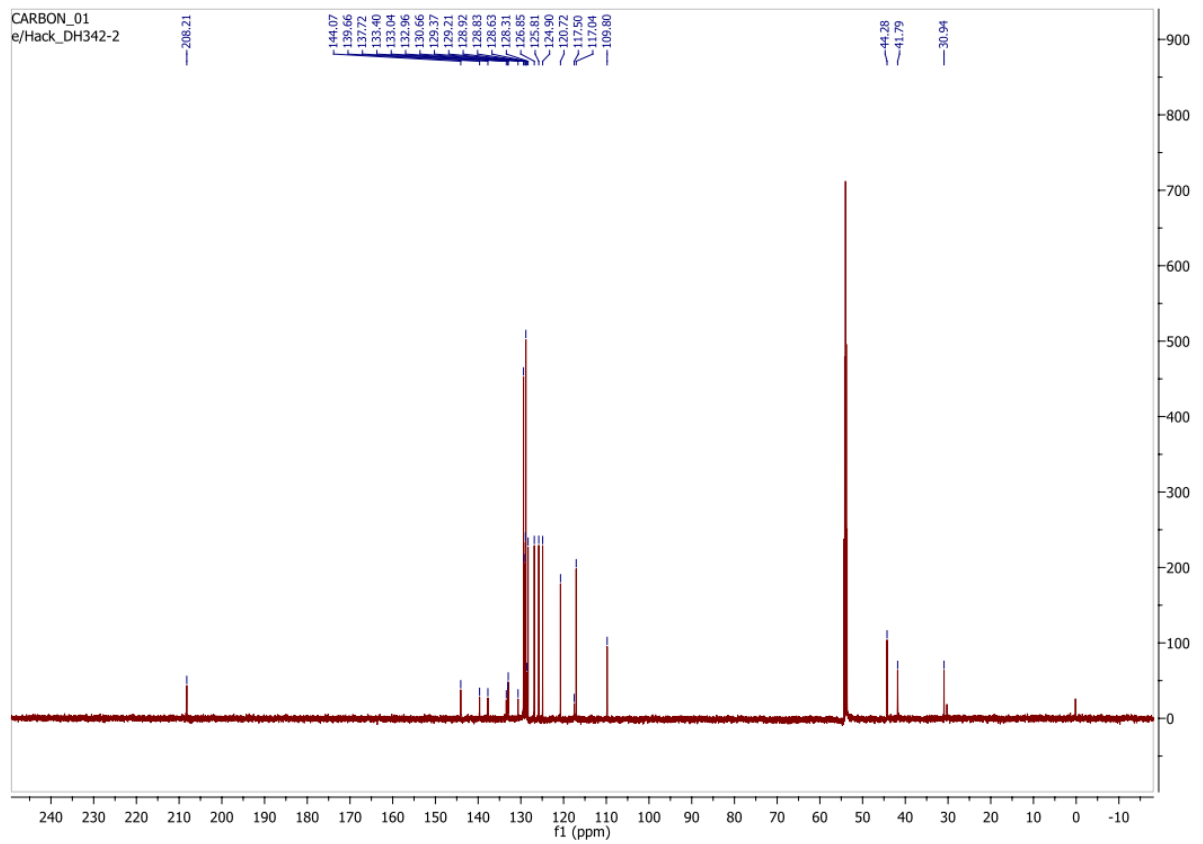

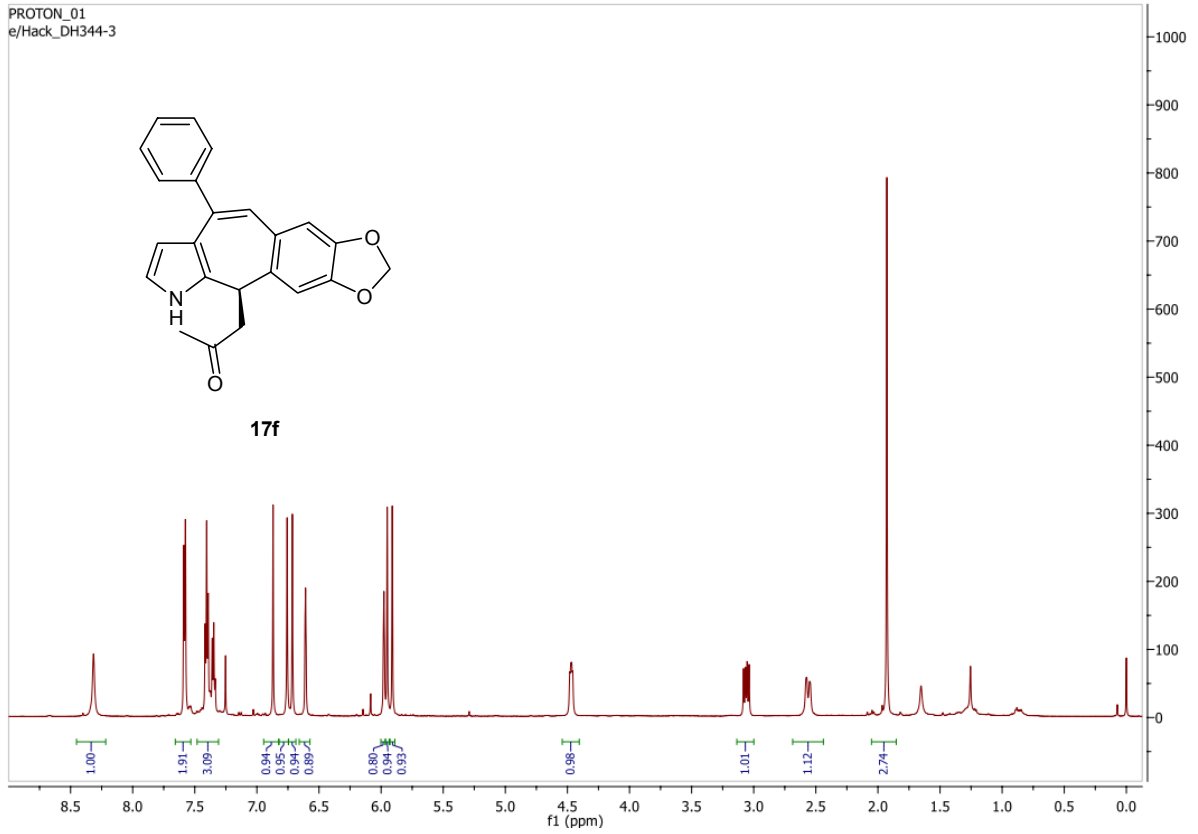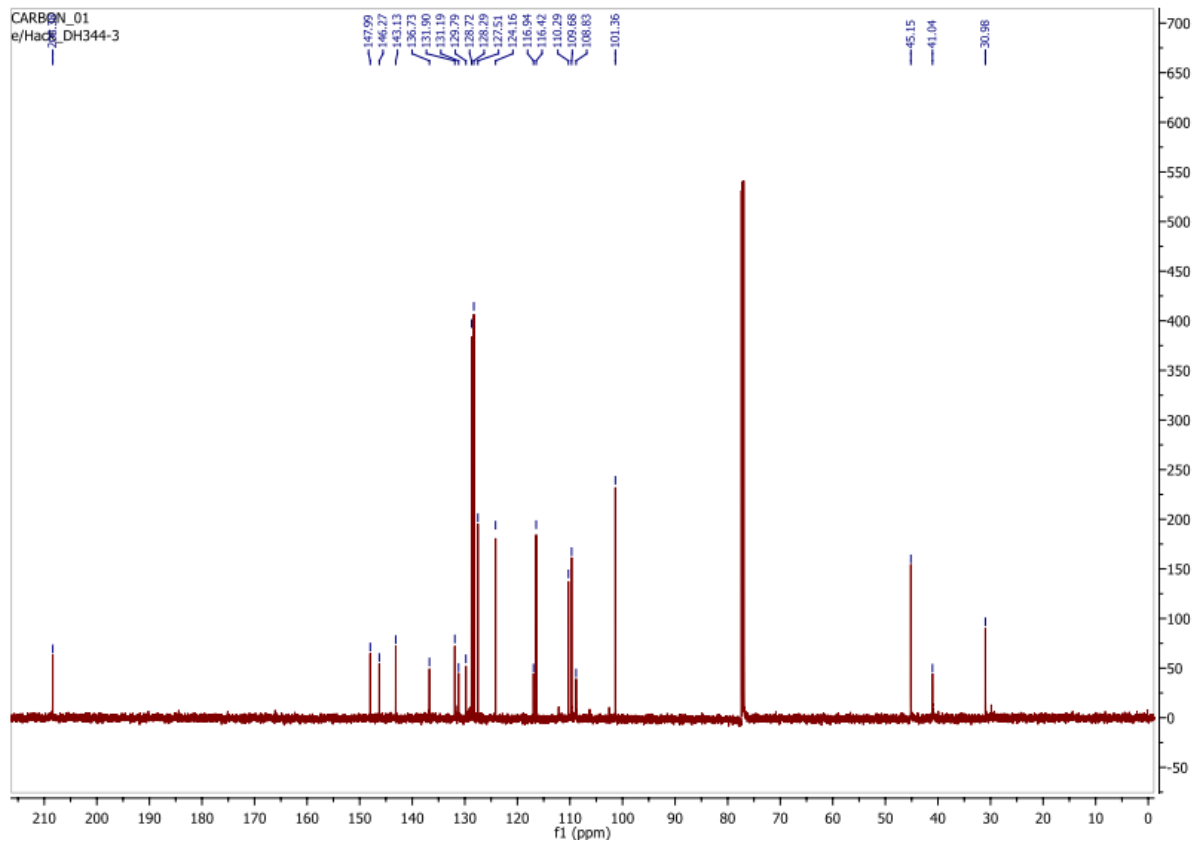



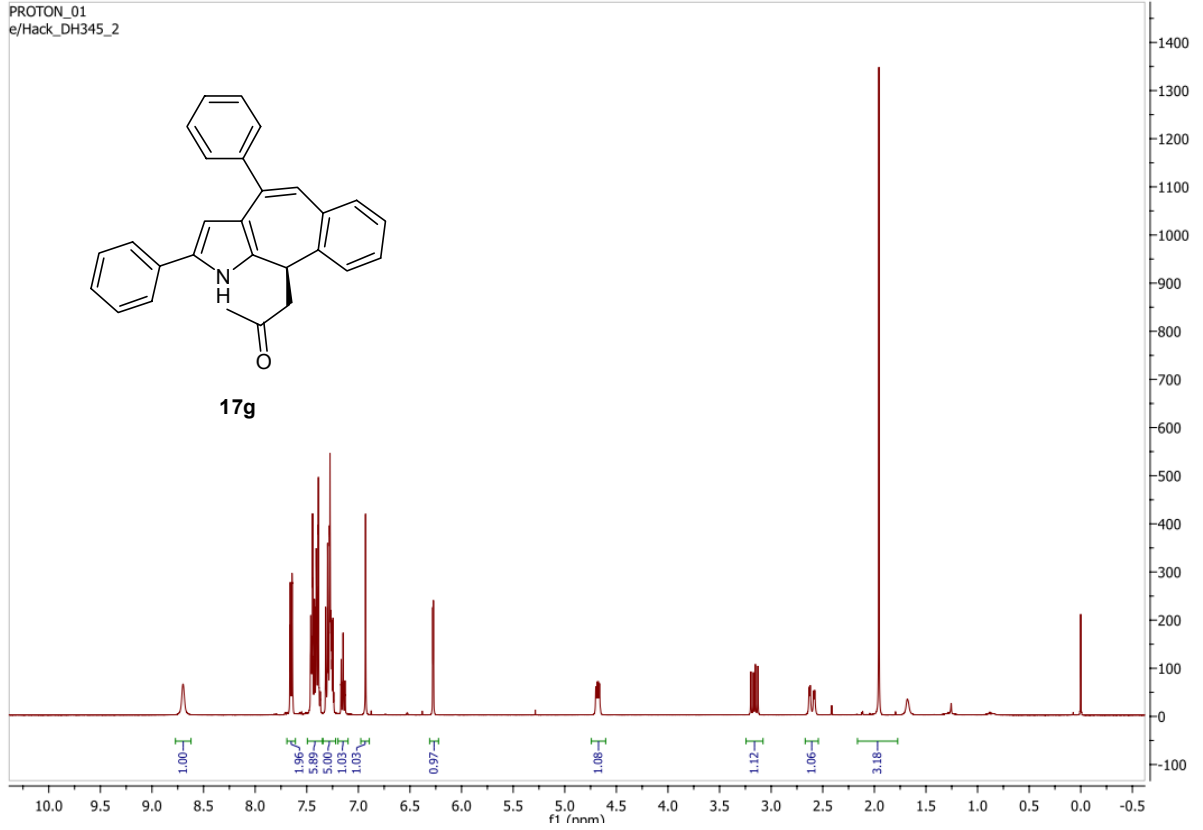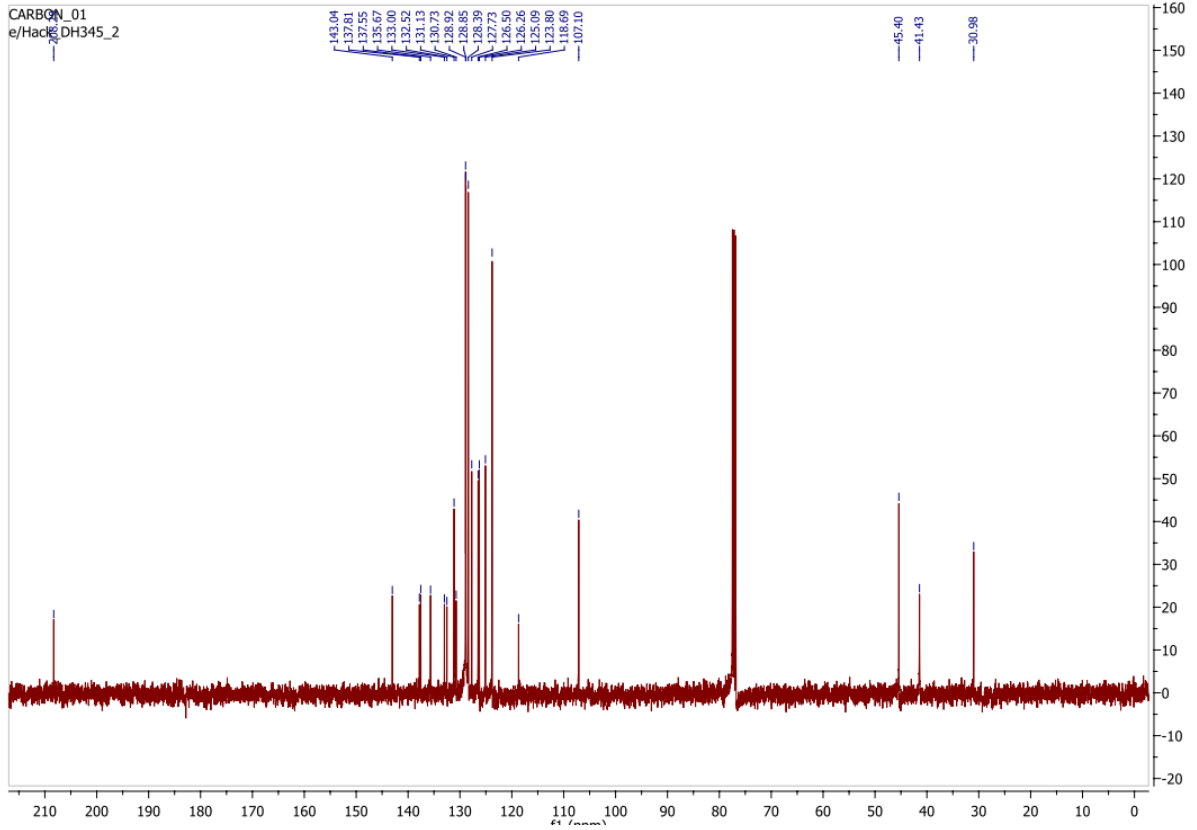

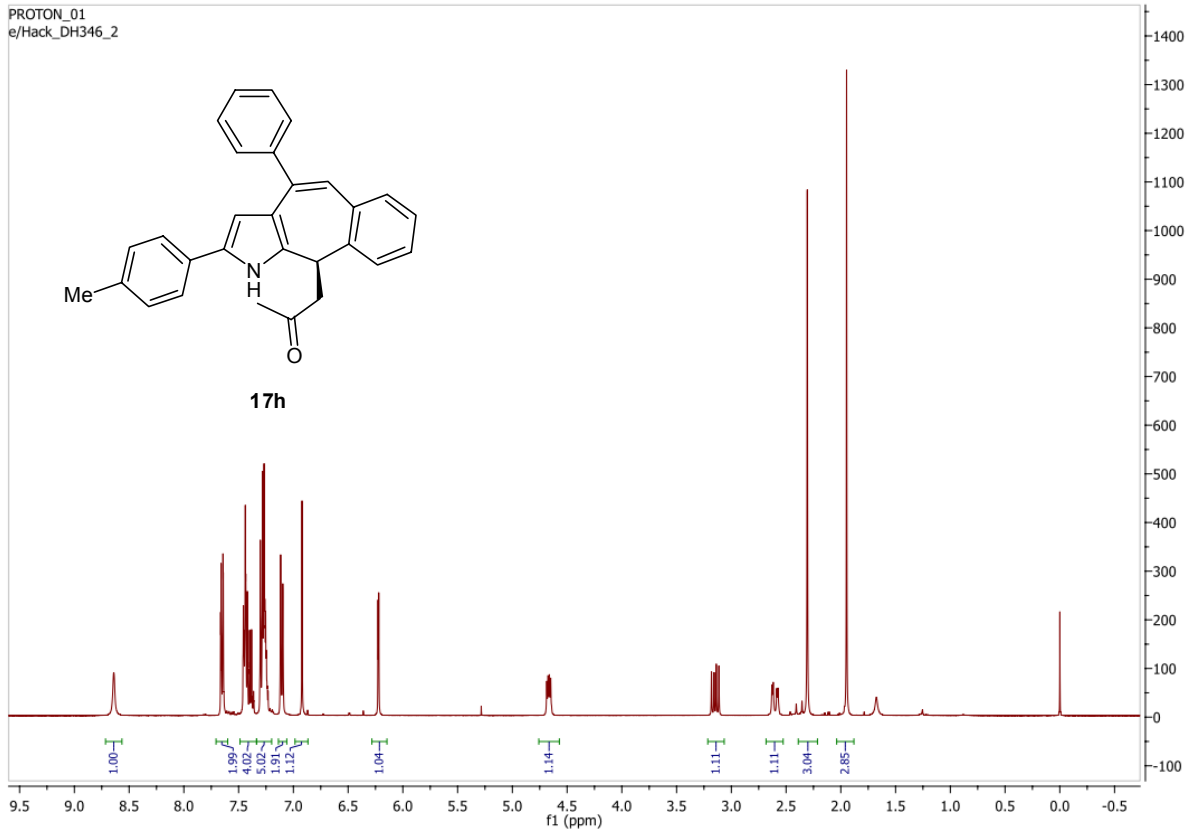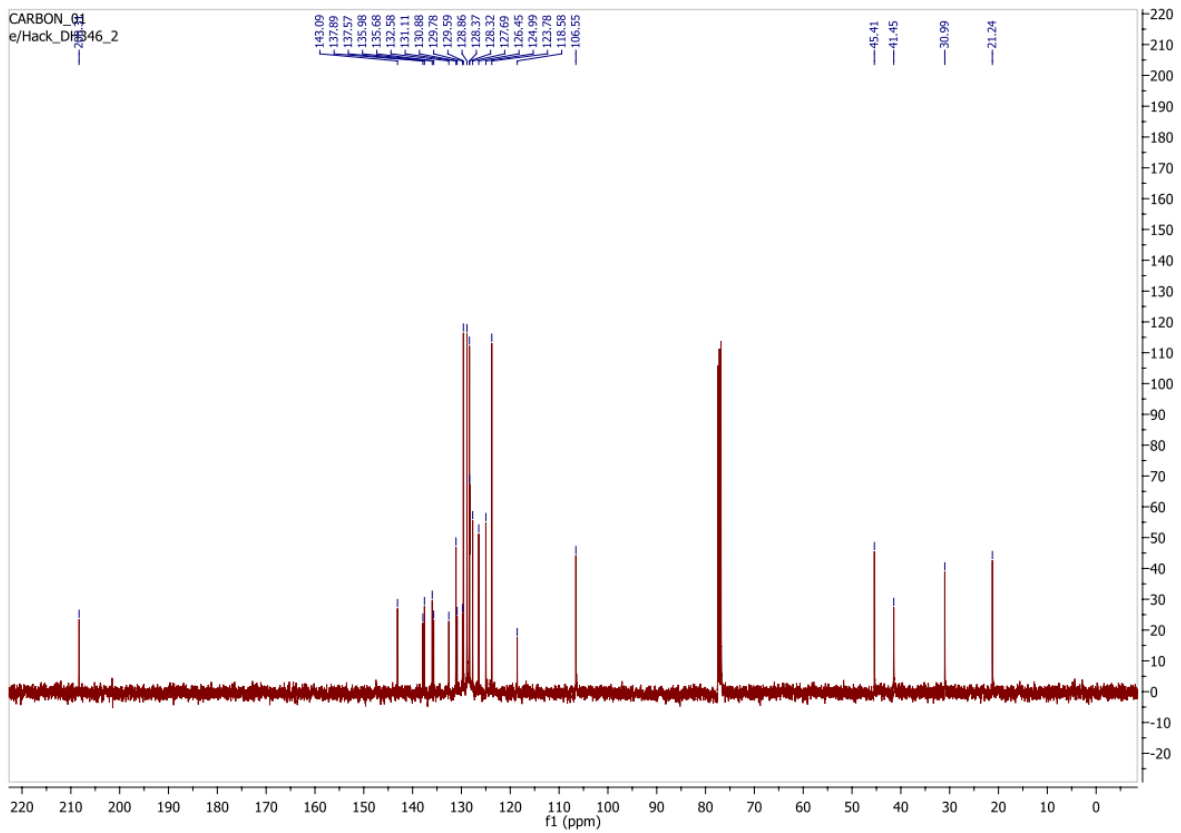

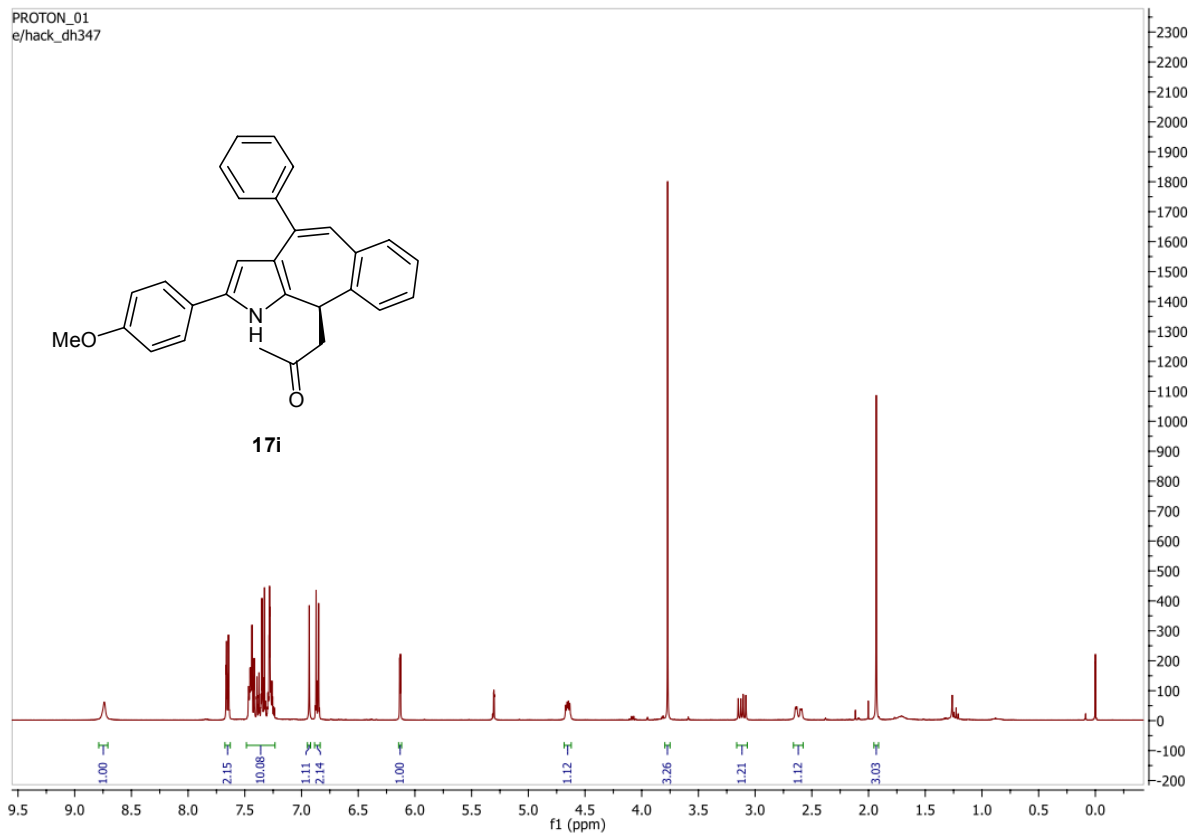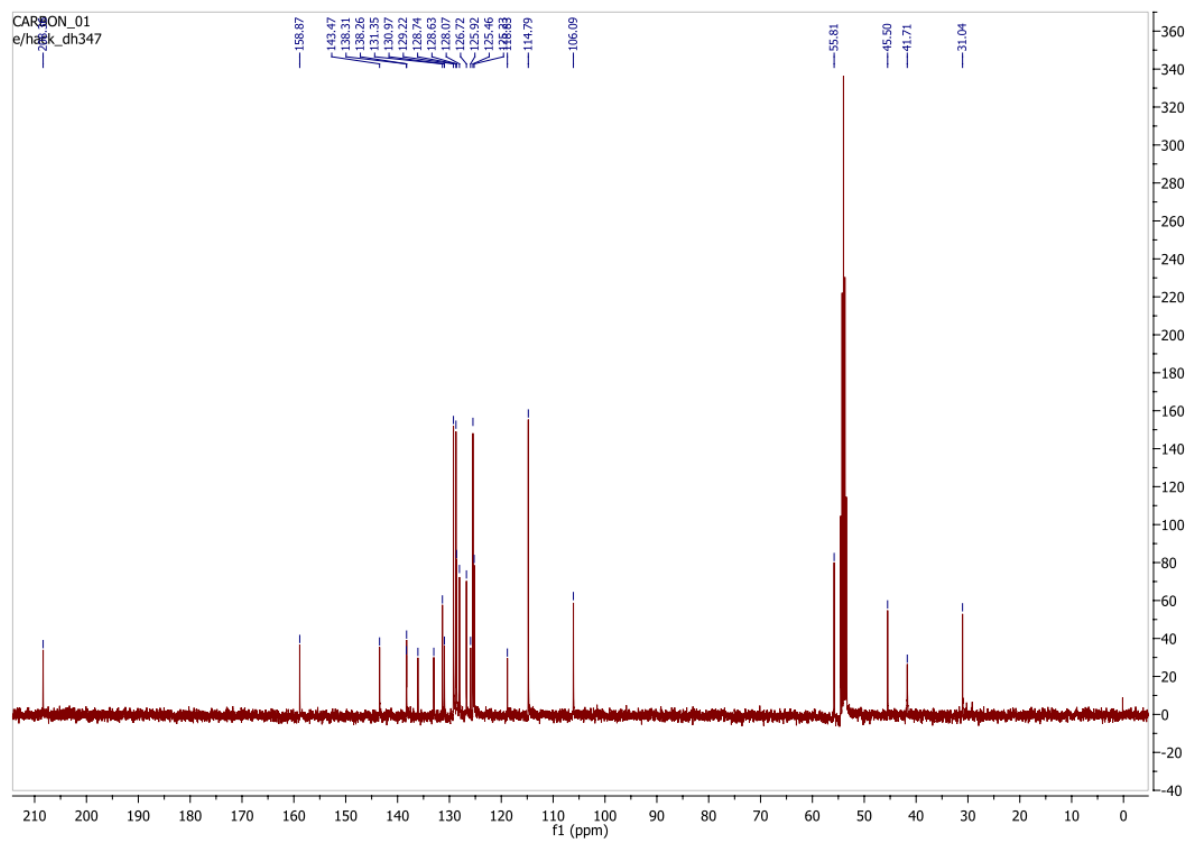

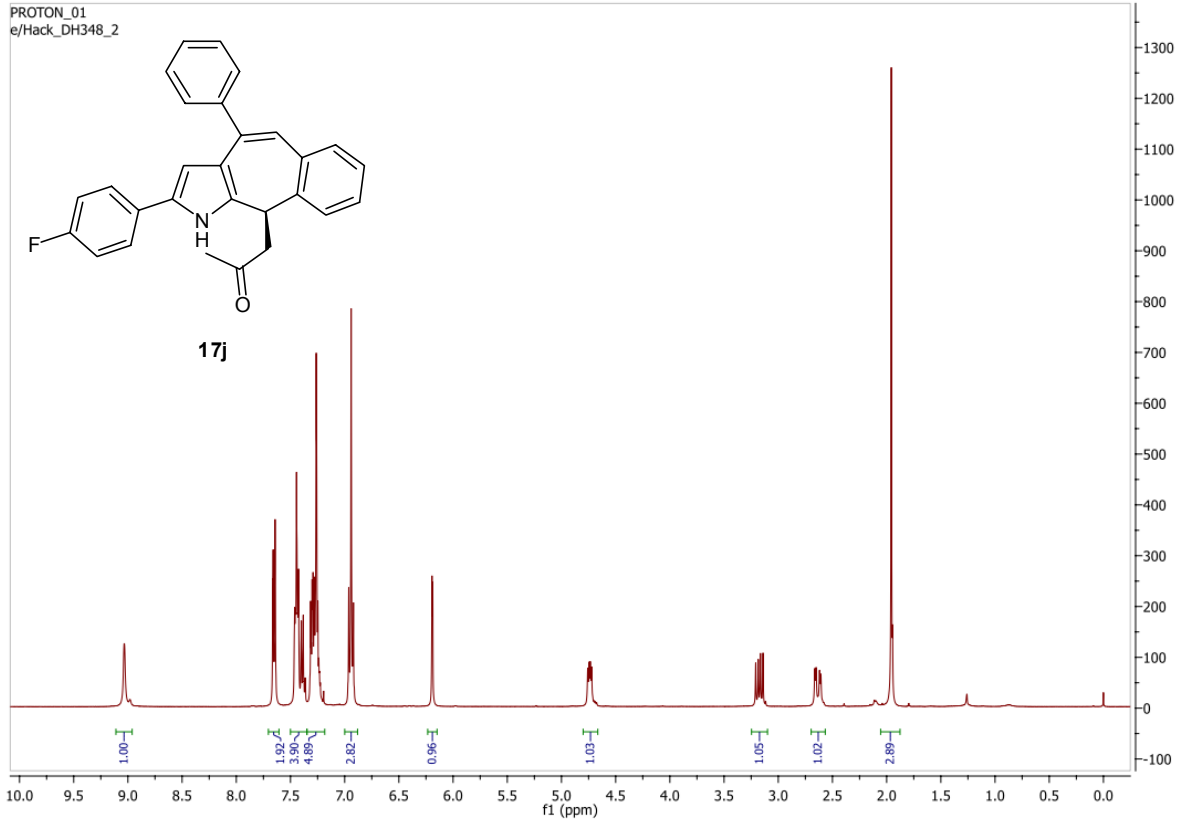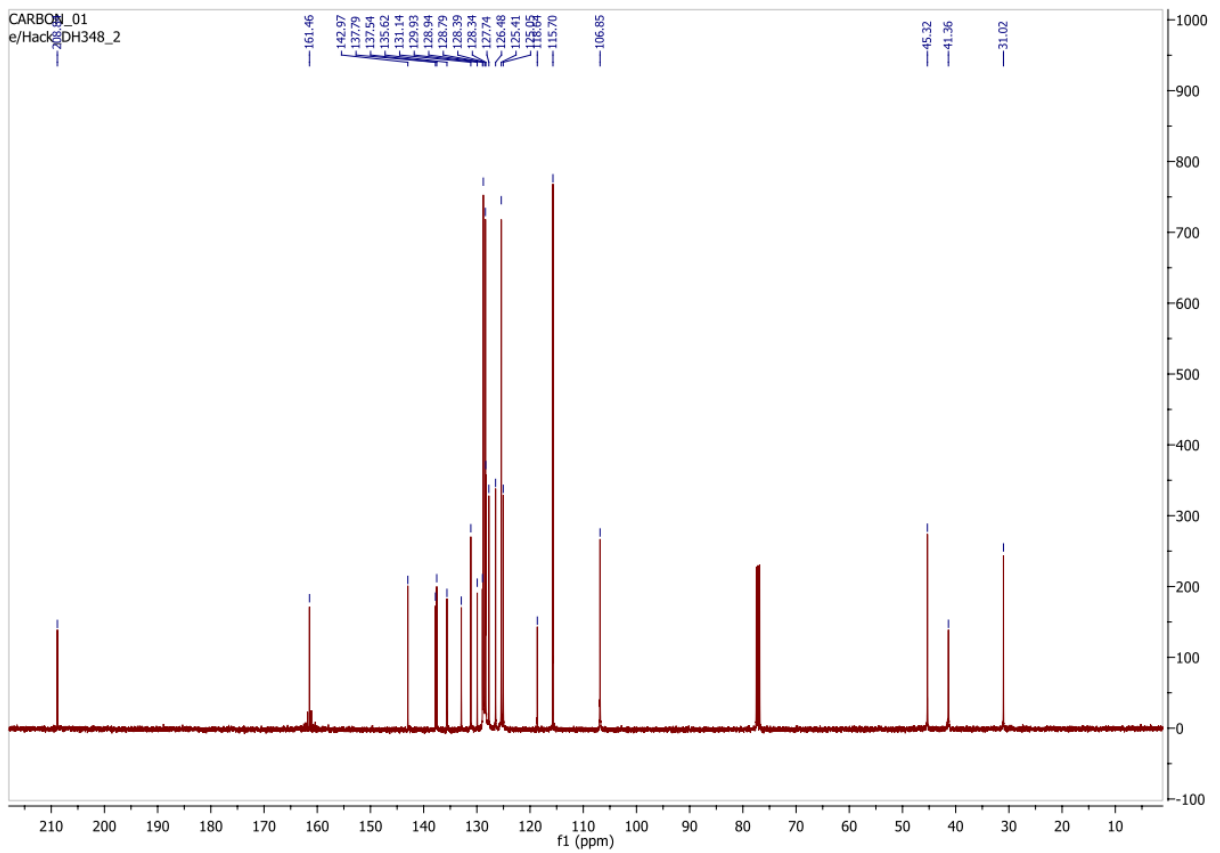

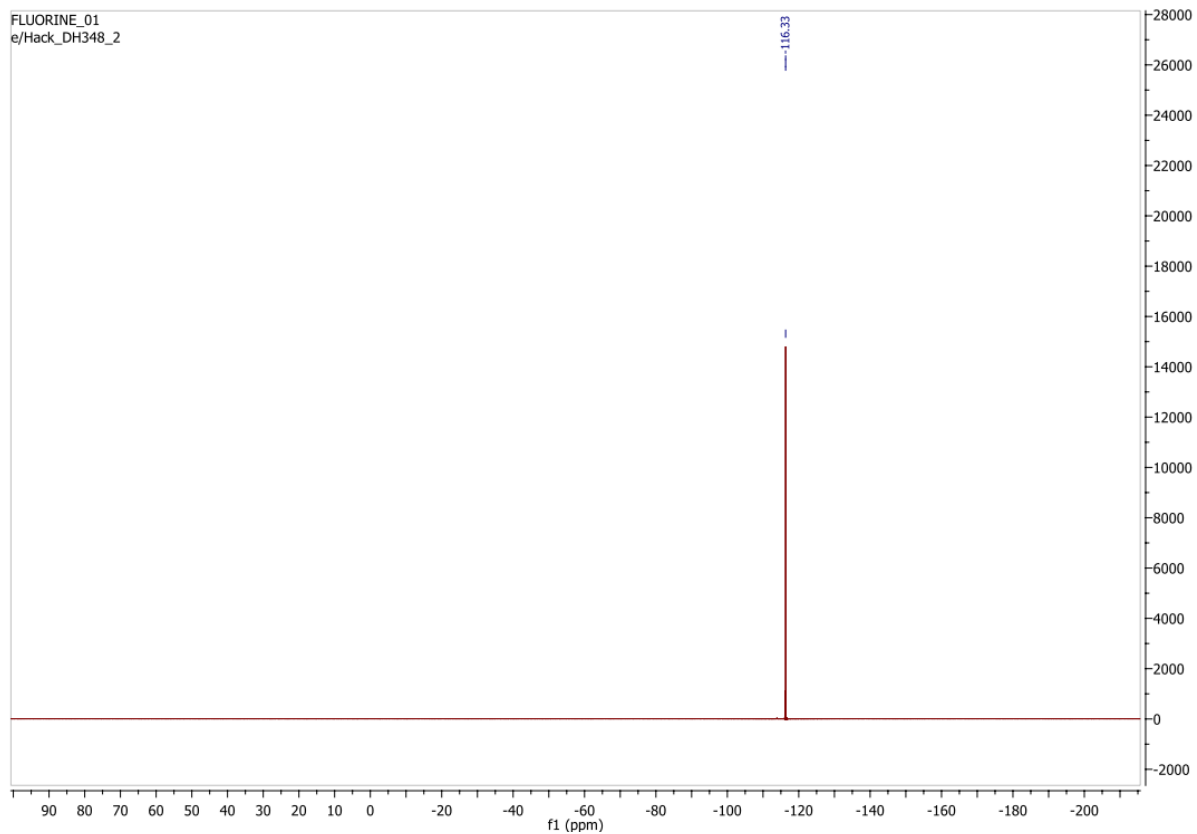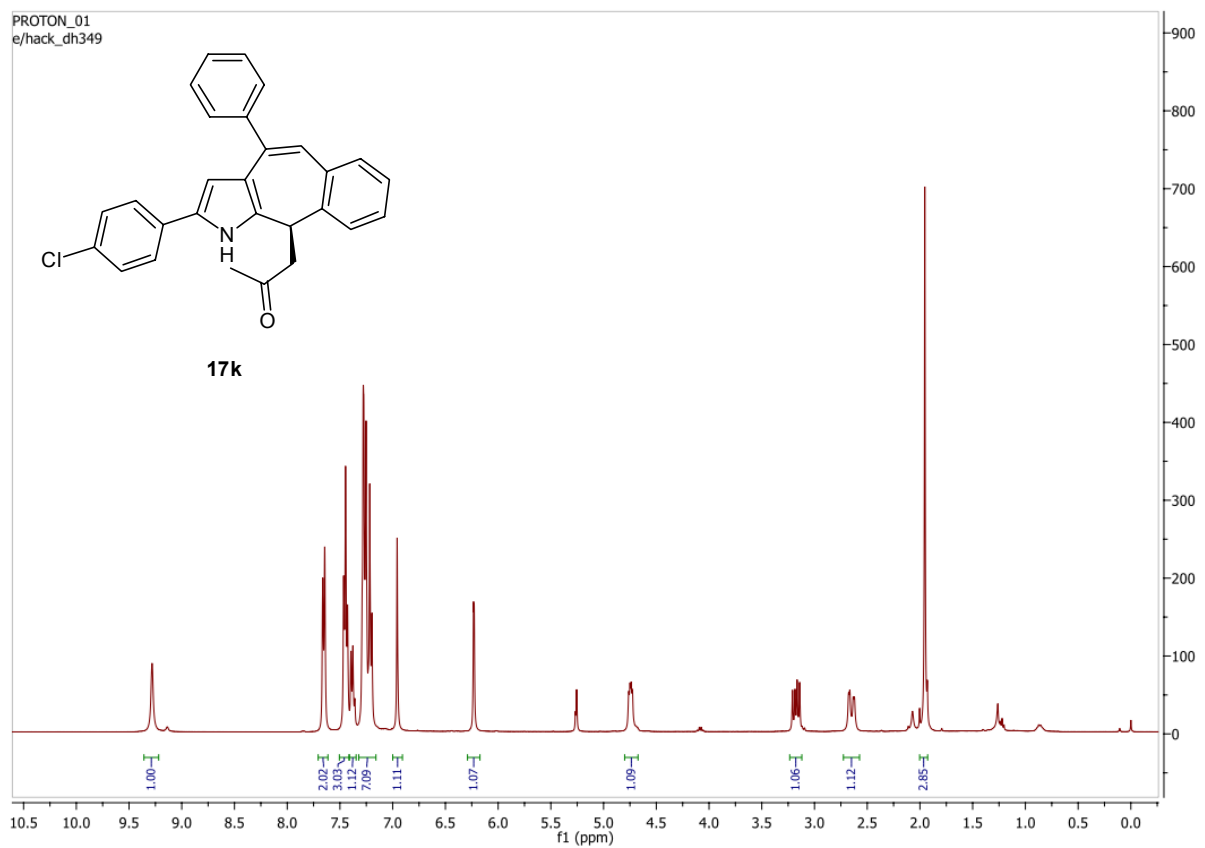

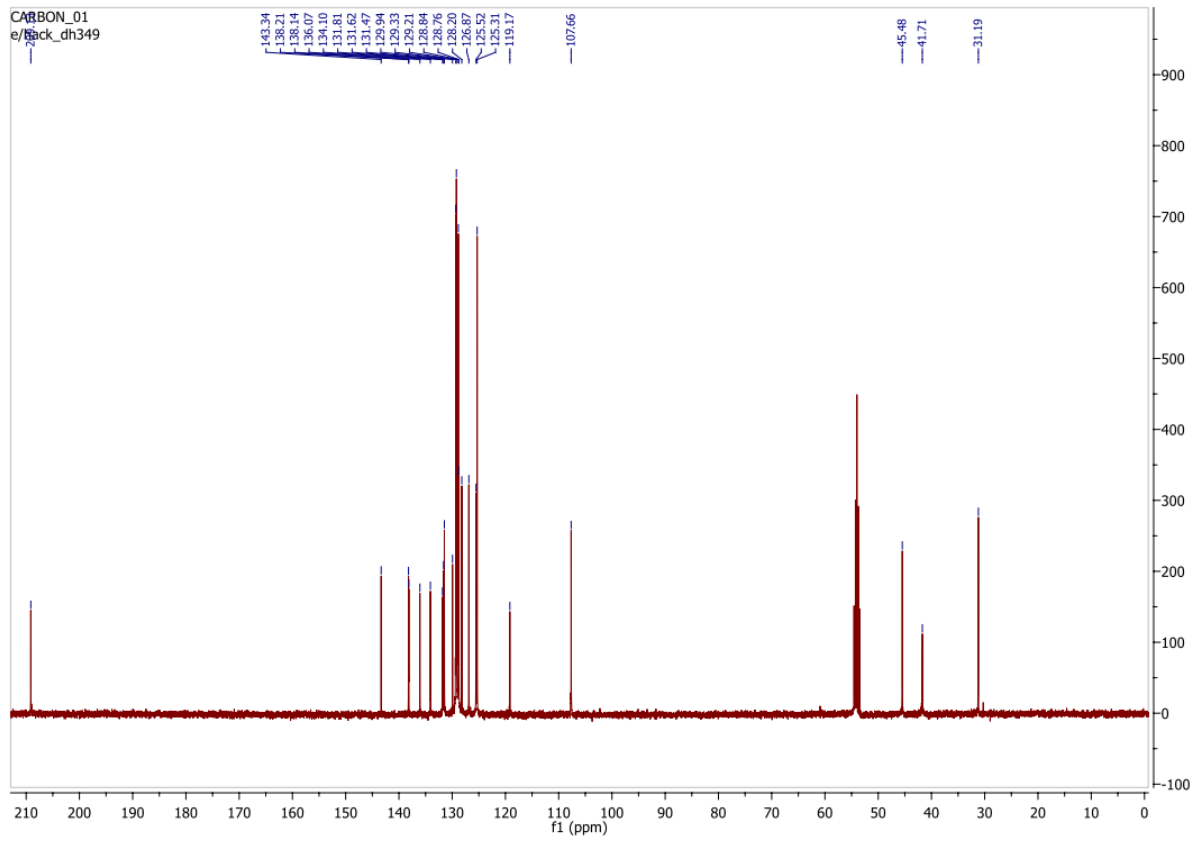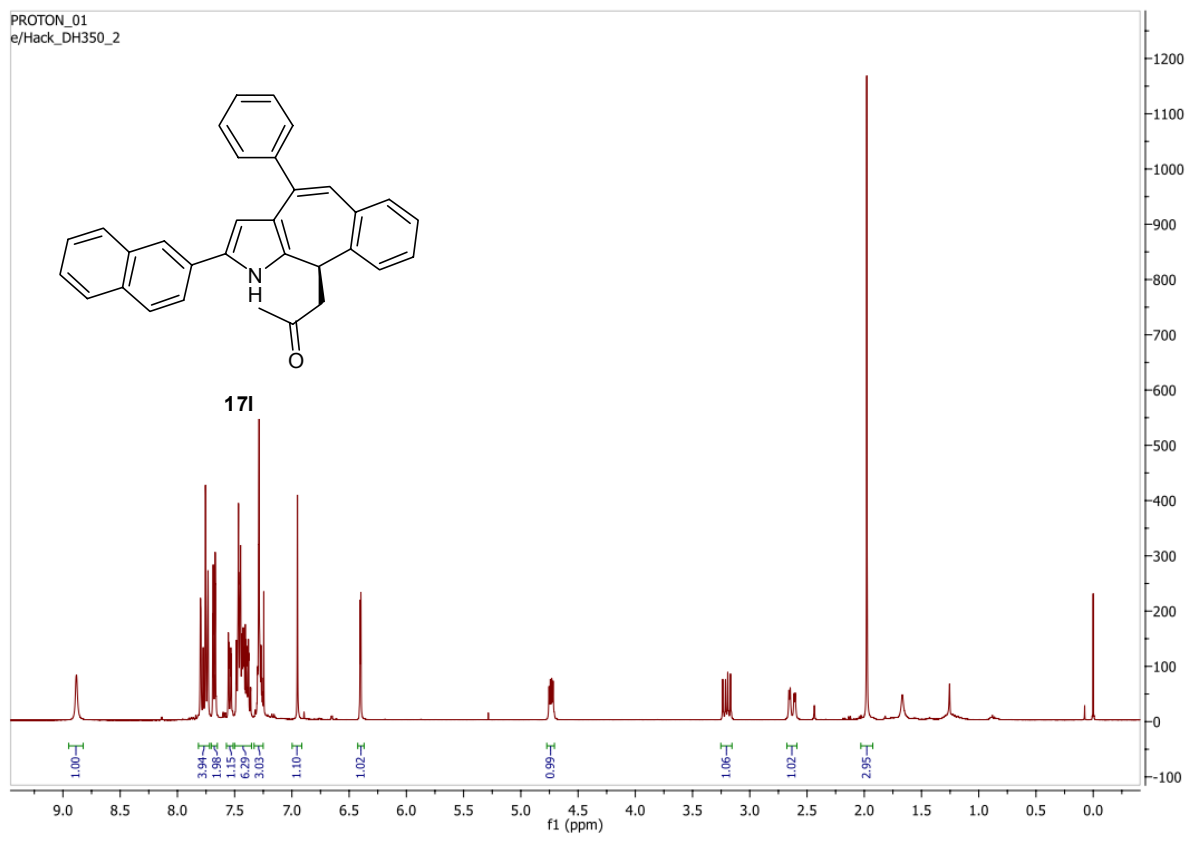

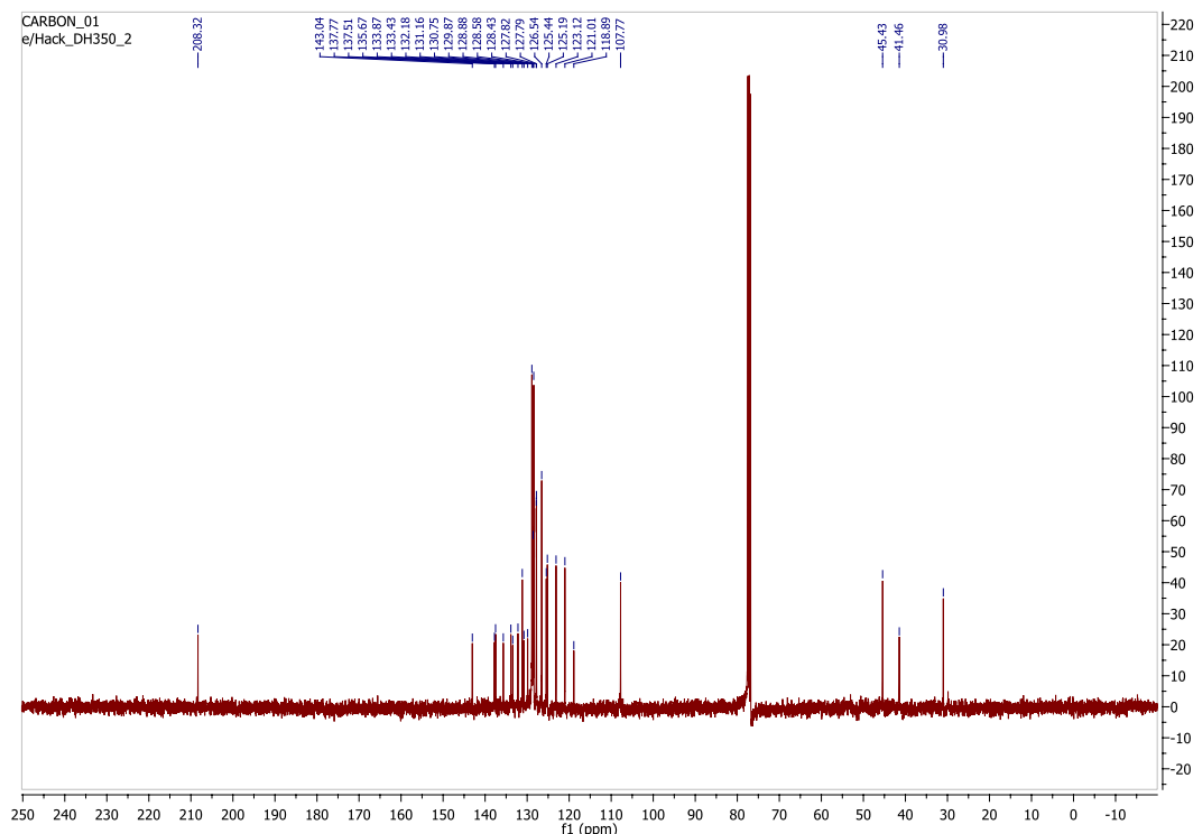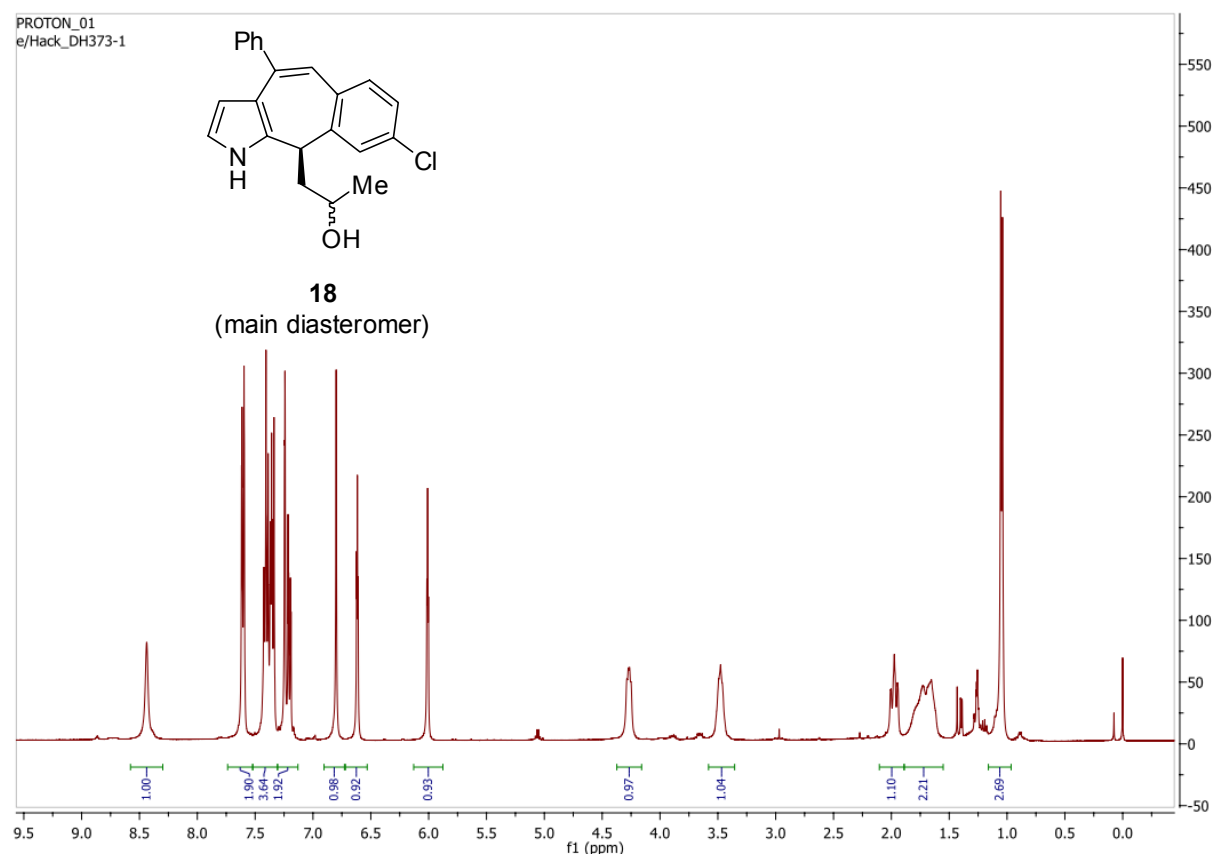

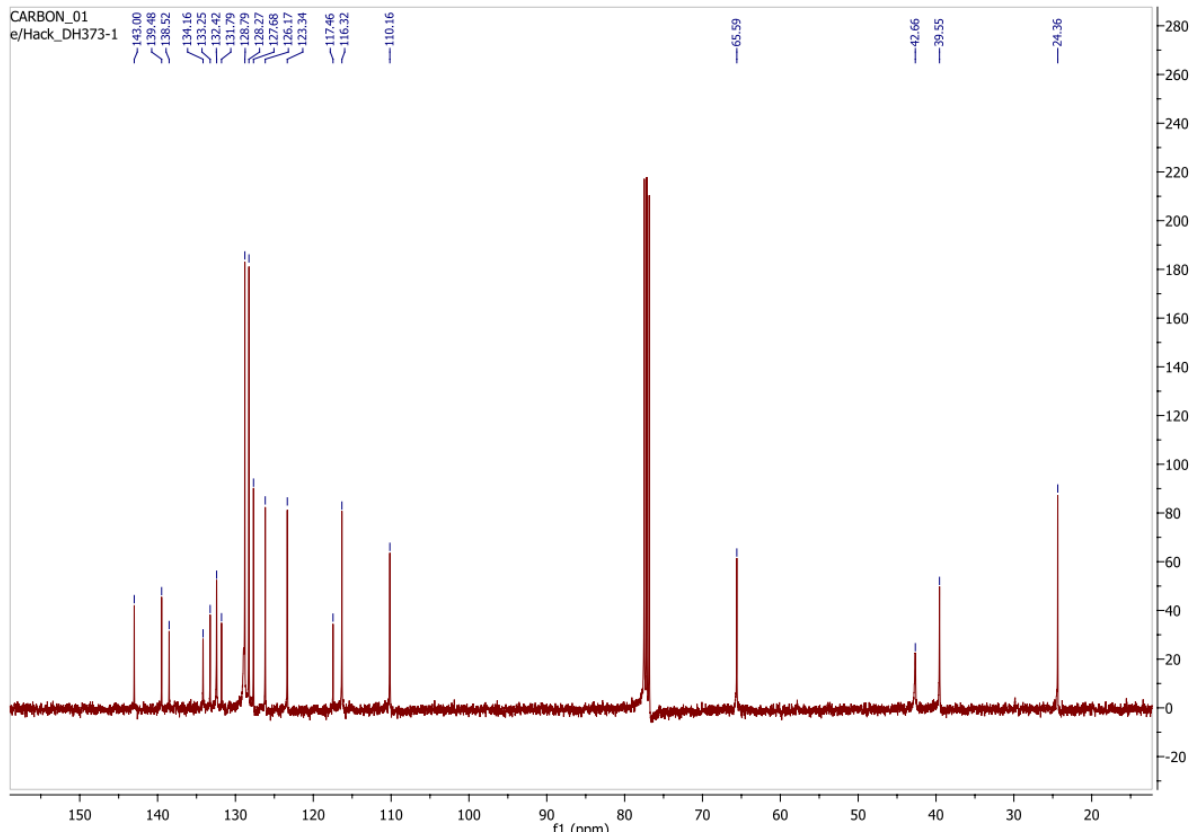

Supplement: NIHMS61040-supplement-Supp.pdf [file NIHMS61040-supplement-Supp.pdf]
